# Supplementary material for: Predicting the local COVID-19 outbreak around the world with meteorological conditions: a model-based qualitative study
Source: PubMed Central journal article supplement — BMJ Open. 2020 Nov 16;10(11):e041397. doi: 10.1136/bmjopen-2020-041397 (PMC7670553; doi:10.1136/bmjopen-2020-041397), 2020-11-16
Supplement: bmjopen-2020-041397.draft_revisions.pdf [file bmjopen-2020-041397.draft_revisions.pdf]

# BMJ Open

BMJ Open is committed to open peer review. As part of this commitment we make the peer review history of every article we publish publicly available.

When an article is published we post the peer reviewers' comments and the authors' responses online. We also post the versions of the paper that were used during peer review. These are the versions that the peer review comments apply to.

The versions of the paper that follow are the versions that were submitted during the peer review process. They are not the versions of record or the final published versions. They should not be cited or distributed as the published version of this manuscript.

BMJ Open is an open access journal and the full, final, typeset and author-corrected version of record of the manuscript is available on our site with no access controls, subscription charges or pay-per-view fees (<http://bmjopen.bmj.com>).

If you have any questions on BMJ Open's open peer review process please email [info.bmjopen@bmj.com](mailto:info.bmjopen@bmj.com)

# BMJ Open

## A generalized model for predicting the local COVID-19 outbreak around the world based on meteorological conditions

|                               |                                                                                                                                                                                                                                                                                                                                                                                                                                                                                                                                                                                                                                                                                                                                                                                                                                                                                                                                                                             |
|-------------------------------|-----------------------------------------------------------------------------------------------------------------------------------------------------------------------------------------------------------------------------------------------------------------------------------------------------------------------------------------------------------------------------------------------------------------------------------------------------------------------------------------------------------------------------------------------------------------------------------------------------------------------------------------------------------------------------------------------------------------------------------------------------------------------------------------------------------------------------------------------------------------------------------------------------------------------------------------------------------------------------|
| Journal:                      | <i>BMJ Open</i>                                                                                                                                                                                                                                                                                                                                                                                                                                                                                                                                                                                                                                                                                                                                                                                                                                                                                                                                                             |
| Manuscript ID                 | bmjopen-2020-041397                                                                                                                                                                                                                                                                                                                                                                                                                                                                                                                                                                                                                                                                                                                                                                                                                                                                                                                                                         |
| Article Type:                 | Original research                                                                                                                                                                                                                                                                                                                                                                                                                                                                                                                                                                                                                                                                                                                                                                                                                                                                                                                                                           |
| Date Submitted by the Author: | 09-Jun-2020                                                                                                                                                                                                                                                                                                                                                                                                                                                                                                                                                                                                                                                                                                                                                                                                                                                                                                                                                                 |
| Complete List of Authors:     | Chen, Biqing; Affiliated Hospital of Nanjing University of Chinese Medicine, Research Center of Chinese Medicine<br>Liang, Hao ; Affiliated Hospital of Nanjing University of Chinese Medicine, Department of Hematology<br>Yuan, Xiaomin ; Affiliated Hospital of Nanjing University of Chinese Medicine, Department of Colorectal Surgery<br>Hu, Yingying ; Affiliated Hospital of Nanjing University of Chinese Medicine, Department of Hematology<br>Xu, Miao; Affiliated Hospital of Nanjing University of Chinese Medicine, Department of Hematology<br>Zhao, Yating ; Nanjing University<br>Zhang, Binfen ; Affiliated Hospital of Nanjing University of Chinese Medicine, Department of Hematology<br>Tian, Fang ; Affiliated Hospital of Nanjing University of Chinese Medicine, Research Center of Chinese Medicine<br>Zhu, Xuejun ; Affiliated Hospital of Nanjing University of Chinese Medicine, Department of Hematology, Research Center of Chinese Medicine |
| Keywords:                     | Epidemiology < INFECTIOUS DISEASES, EPIDEMIOLOGY, Public health < INFECTIOUS DISEASES, Infection control < INFECTIOUS DISEASES                                                                                                                                                                                                                                                                                                                                                                                                                                                                                                                                                                                                                                                                                                                                                                                                                                              |
|                               |                                                                                                                                                                                                                                                                                                                                                                                                                                                                                                                                                                                                                                                                                                                                                                                                                                                                                                                                                                             |

SCHOLARONE™  
Manuscripts

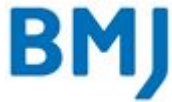

I, the Submitting Author has the right to grant and does grant on behalf of all authors of the Work (as defined in the below author licence), an exclusive licence and/or a non-exclusive licence for contributions from authors who are: i) UK Crown employees; ii) where BMJ has agreed a CC-BY licence shall apply, and/or iii) in accordance with the terms applicable for US Federal Government officers or employees acting as part of their official duties; on a worldwide, perpetual, irrevocable, royalty-free basis to BMJ Publishing Group Ltd ("BMJ") its licensees and where the relevant Journal is co-owned by BMJ to the co-owners of the Journal, to publish the Work in this journal and any other BMJ products and to exploit all rights, as set out in our [licence](#).

The Submitting Author accepts and understands that any supply made under these terms is made by BMJ to the Submitting Author unless you are acting as an employee on behalf of your employer or a postgraduate student of an affiliated institution which is paying any applicable article publishing charge ("APC") for Open Access articles. Where the Submitting Author wishes to make the Work available on an Open Access basis (and intends to pay the relevant APC), the terms of reuse of such Open Access shall be governed by a Creative Commons licence – details of these licences and which [Creative Commons](#) licence will apply to this Work are set out in our licence referred to above.

Other than as permitted in any relevant BMJ Author's Self Archiving Policies, I confirm this Work has not been accepted for publication elsewhere, is not being considered for publication elsewhere and does not duplicate material already published. I confirm all authors consent to publication of this Work and authorise the granting of this licence.

1  
2  
3  
4 **Title: A generalized model for predicting the local COVID-19 outbreak**  
5  
6 **around the world based on meteorological conditions**  
7  
8

9 **Authors:** Biqing Chen<sup>1</sup>, Hao Liang<sup>2</sup>, Xiaomin Yuan<sup>3</sup>, Yingying Hu<sup>2</sup>, Miao Xu<sup>2</sup>, Yating Zhao<sup>4</sup>,  
10  
11 Binfen Zhang<sup>2</sup>, Fang Tian<sup>1</sup>, Xuejun Zhu<sup>1,2\*</sup>  
12  
13

14  
15  
16 5 **Affiliations:**  
17

18 <sup>1</sup> Research Center of Chinese Medicine, Jiangsu Province Hospital of Chinese Medicine, the  
19  
20 Affiliated Hospital of Nanjing University of Chinese Medicine, Nanjing, China.  
21  
22

23 <sup>2</sup> Department of Hematology, Jiangsu Province Hospital of Chinese Medicine, the Affiliated  
24  
25 Hospital of Nanjing University of Chinese Medicine, Nanjing, China.  
26  
27

28 <sup>3</sup> Department of Colorectal Surgery, Jiangsu Province Hospital of Chinese Medicine, the  
29 10  
30 Affiliated Hospital of Nanjing University of Chinese Medicine, Nanjing, China.  
31  
32

33 <sup>4</sup> School of Atmospheric Sciences, Nanjing University, Nanjing, China  
34  
35

36 \*Correspondence to: Xuejun Zhu, zhuxuejun@njucm.edu.cn.  
37  
38

39  
40 15 **Abstract: Background** The COVID-19 has become a pandemic worldwide. **Methods** We  
41  
42 collected 382,596 records of weather data with four meteorological factors, i.e., average  
43  
44 temperature, relative humidity, wind speed, and visibility, and 15,192 records of epidemic data  
45  
46 with daily new confirmed case counts (1,587,209 confirmed cases in total) in over 500 areas  
47  
48 worldwide from January 20 to April 9. Epidemic data were modeled against weather data to find  
49  
50 a model that could best predict the future outbreak. **Results** Significant correlations of the daily  
51 20  
52 new confirmed case counts with the weather 3~7 days ago were found. SARS-CoV-2 is easy to  
53  
54 spread under weather conditions of average temperature at 7.9 °C, relative humidity at 70%~80%,  
55  
56  
57  
58  
59  
60

1  
2  
3 wind speed at 4~10 miles / hour, and visibility less than 10 statute miles. A short-term model  
4  
5 with these meteorological variables in the past 3~7 days was derived to predict the daily increase  
6  
7 in COVID-19; and a long-term model using temperature to predict the pandemic in the next week  
8  
9 or month was derived. Taken China as a discovery dataset, it was well validated with worldwide  
10  
11 data. According to this model, there are five different viral transmission pattern, "restricted",  
12 5 "controlled", "natural", "tropical", "southern". This model's prediction performance correlates  
13  
14 with the actual observations best (over 0.9 correlation coefficient) under natural spread mode of  
15  
16 SARS-CoV-2 when there is not much human interference by epidemic prevention measures.  
17  
18 **Conclusion** This model can be used for prediction of the future outbreak, and illustrating the  
19  
20 effect of epidemic control for a certain area.  
21  
22  
23  
24 10

25  
26  
27  
28  
29 **Keywords:** COVID-19, SARS-CoV-2, weather, temperature, prediction model, epidemic control  
30  
31  
32  
33  
34

### 35 **Strengths and limitations of this study**

- 36  
37  
38 15 ● The number of daily new confirmed cases is significantly correlated with the weather 3~7  
39  
40 days ago.  
41  
42  
43 ● Average temperature at 7.9 °C, relative humidity at 70%~80%, wind speed at 4~10 miles /  
44  
45 hour, and visibility less than 10 statute miles are the best weather conditions for the spread of  
46  
47 SARS-CoV-2.  
48  
49  
50  
51 20 ● A short-term model consisted of four meteorological factors as a weather coefficient to  
52  
53 multiply with the extant confirmed cases could predict the new case count in the following  
54  
55 three days very well.  
56  
57  
58  
59  
60

- 1  
2  
3 ● A long-term model with temperature could be used to predict the new case count in the next  
4 week or month for a certain area.  
5  
6  
7  
8 ● As the prediction model could illustrate the effect of epidemic control for a certain area,  
9  
10 China and other early outbreak countries have effectively reduced more than 50% of the  
11 potential outbreak.  
12  
13 5  
14  
15  
16  
17  
18  
19  
20  
21  
22  
23  
24  
25  
26  
27  
28  
29  
30  
31  
32  
33  
34  
35  
36  
37  
38  
39  
40  
41  
42  
43  
44  
45  
46  
47  
48  
49  
50  
51  
52  
53  
54  
55  
56  
57  
58  
59  
60
- A long-term model with temperature could be used to predict the new case count in the next week or month for a certain area.
  - As the prediction model could illustrate the effect of epidemic control for a certain area, China and other early outbreak countries have effectively reduced more than 50% of the potential outbreak.

For peer review only

## Introduction

The COVID-19 pandemic caused by SARS-CoV-2 has spread all over the world and has great social and economic impact worldwide (1,2). It exhibits high human-to-human transmissibility compared to other coronavirus like SARS (3). As of April 28 in 2020, the reported cumulative confirmed case count reached over three million and reported death is over 0.21 million globally (4). It would be crucial to predict the future trend of COVID-19 outbreak ahead, in order to make proper prevention and control strategies accordingly in time.

Besides population mobility and human-to-human contact, meteorological conditions have been suggested to be involved in the transmission of droplet-mediated viral diseases (5,6). As droplets carrying the coronavirus can travel in gaseous clouds as far as eight metres and stay suspended in the air for hours (7), the suspending time and viability of the coronavirus outside body would be largely affected by the environment. Wind speed could affect the suspending time of droplets, while visibility and humidity reflect the amount of particles in the air, determining the coronavirus payload. Temperature affects virus's viability in the environment. As SARS-CoV-2 is enveloped, it might be more vulnerable to adverse conditions like high temperature.

The impact of weather on epidemiology has been mentioned in human's history. The ancient Chinese had a theory called "Five Movement and Six Weather" to study climate change and its relationship with human health. According to this theory, plague is likely to outbreak in 2020, in consistency with the pandemic. Currently, there are a few studies on preprint servers discussing the relationship of temperature and humidity with the pandemic, but none is systematical investigation or proposes validated practical model for prediction (8-13).

Herein, this study intends to investigate the relationship between meteorological factors and epidemic transmission rate on a world scale. Four meteorological variables, i.e., average

1  
2  
3 temperature, relative humidity, wind speed, and visibility, were collected as well as the confirmed  
4 case counts daily for 80 days for over 500 areas around the world. Five time delays of the  
5 epidemic situation from the exposure day were considered and compared to determine the most  
6 reasonable time delay. A multivariate polynomial regression model with meteorological factors  
7 as a "weather coefficient" of the extant case count was established in a discovery Chinese dataset,  
8 and then validated by worldwide data. Five transmission modes, indicating different levels of  
9 epidemic control, were revealed by this model. In this view, this model can not only predict  
10 future outbreak, but also be used to evaluate the effect of epidemic prevention measures for a  
11 certain area.  
12  
13  
14  
15  
16  
17  
18  
19  
20  
21  
22  
23  
24  
25  
26

## 27 **Materials and Methods**

### 28 Epidemiological data

29  
30  
31  
32 Epidemiological data were collected from the World Health Organization (WHO) (4),  
33 European Centre for Disease Control and Prevention, and DXY-COVID-19-Data (14). The daily  
34 new confirmed case counts were collected from January 20, 2020 to April 9, 2020. Incidence data  
35 were obtained for every Chinese city or district as a discovery dataset, while those for 21 Italian  
36 provinces and all the other nations were taken as replication datasets (Supplementary Materials).  
37  
38  
39  
40  
41  
42  
43

### 44 Weather data

45  
46 We obtained hourly values of meteorological observations and geographic factors (latitude  
47 and elevation) from the Integrated Surface Database of USA National Centers for Environmental  
48 Information (15). Temperature, dew point, wind speed, and visibility were collected, and relative  
49 humidity was calculated accordingly (Supplementary Materials). Daily data were calculated by  
50 averaging the hourly data for each variable in each day.  
51  
52  
53  
54  
55  
56  
57  
58  
59  
60



### Statistical modeling

The number of daily new confirmed cases was taken as a dependent variable. Four meteorological variables, namely, average temperature, wind speed, visibility, and relative humidity, and the extant confirmed case counts were taken as independent variables. Considering that there is a latency stage from the day one get infected to the day being confirmed, a time delay of the day COVID-19 was confirmed from the day weather data were collected needs to be taken into consideration. As it is reported that the latency period for COVID-19 is 3~7 days on average and 14 days at most, five time points delay of virus infection were taken into consideration, that is, weather data and extant confirmed cases count data were collected on the day, three days before, seven days before, 3~7 days before, and 14 days before collecting the epidemiological data. A Loess regression interpolation approach was adopted to visually identify the relationship between meteorological variables and confirmed new case counts. Basic statistics and modeling was conducted in R 3.5.1 (16).

### Model validation and application

The best fitted model was validated in the replication datasets by correlating the observed actual epidemiological data with the predicted values from the model in the datasets. We used these fitted models to calculate a predicted value for case counts for each studied site, and then compared this predicted value with the real observed case counts by calculating a Pearson's correlation coefficient between them.

### Patient and Public Involvement

No specific patients were included in the current study.

## **Results**

### 3~7 days delay of the outbreak from exposure

1  
2  
3 The average temperature, relative humidity, wind speed, and visibility ranges in the replication  
4 datasets were similar to the discovery dataset (see Supplementary Results for detailed datasets  
5 description). Regression interpolation showed that the weather 3~7 days ago was correlated with  
6 the confirmed new case counts in a most reasonable manner, as well as weather one week ago.  
7  
8 The effects of temperature and relative humidity on the new confirmed case count exhibited a  
9 bell-shaped trend, while wind speed and visibility were negatively correlated with the new case  
10 count (Fig. 1). It coincided with the latency period of 3~7 days for SARS-CoV-2, that is,  
11 exposure under certain adverse weather might exhibit its effect after 3~7 days.  
12  
13  
14  
15  
16  
17  
18  
19  
20  
21

### 22 Contribution of single meteorological factor to the outbreak

23  
24  
25 10 To elucidate the contribution of each meteorological factor to the case counts, we first performed  
26 single-factor regression modeling for each meteorological variable in the discovery dataset.  
27 Temperature, relative humidity, and wind speed were fitted into quadratic models; and visibility  
28 was fitted into a linear model. It was found that visibility was correlated with the outbreak best,  
29 followed by temperature, relative humidity, and wind speed. The new case count was  
30 significantly negatively correlated with visibility (Spearman's correlation  $\rho = -0.14$ ,  $p < 0.001$ ),  
31 temperature ( $\rho = -0.14$ ,  $p < 0.001$ ), and wind speed ( $\rho = -0.07$ ,  $p < 0.001$ ), but positively  
32 correlated with relative humidity ( $\rho = 0.05$ ,  $p < 0.001$ ). For Wuhan data, a model only with  
33 temperature as a parameter could already explained 45% of the variance in the epidemic data ( $p =$   
34  $4 \times 10^{-4}$ ), while wind speed and visibility could explain over 25% of the variance. According to the  
35 fitted single-factor models for Wuhan, SARS-CoV-2 transmission reaches a peak when mean  
36 temperature is 7.9 °C (Fig. 2A), relative humidity is 77.6% (Fig. 2B), and wind speed is 5.2  
37 miles / hour (Fig. 2C). The effects of geographic factors such as latitude and elevation, and the  
38 pure influence from the extant case count were further investigated (Fig. S1), illustrating that  
39  
40  
41  
42  
43  
44  
45  
46  
47  
48 20  
49  
50  
51  
52  
53  
54  
55  
56  
57  
58  
59  
60

COVID-19 mainly outbreaks at latitude 30°~50°(Fig. S1A) and elevation < 500 metre (Fig. S1B). New confirmed case count was positively correlated with the extant confirmed case count (Fig. S1C).

### Short-term prediction model

We further combined different meteorological variables into a complex short-term model, and took the extant confirmed case count as a base for meteorological factors to multiply. The short-term model fitted was as follows:

$$\begin{aligned} \text{New Case Count} \\ = & (-0.13 \times T^2 + 1.45 \times T - 608 \times RH^2 + 974 \times RH - 0.23 \times SPD^2 + 0.89 \\ & \times SPD - 7.45 \times VSB - 200) \times \alpha \times \text{Extant Case Count} \end{aligned}$$

where T is temperature in °C, RH is relative humidity in percentage, SPD is wind speed in miles per hour, VSB is visibility in statute miles,  $\alpha$  is a site-specific constant, with a default of 0.002. All parameters take the means of values 3~7 days before the day new case count is evaluated.

In this model, all the four meteorological variables are added together in their proper forms to compose a "weather coefficient" (the equation in brackets), which affects the transmission rate of SARS-CoV-2, and thus influences the number of people that catch infection from the extant confirmed cases, which then determines the new confirmed case count 3~7 days later. There is a multiplicative factor  $\alpha$  in the equation, which seems site-related and determines the strength of the "weather coefficient" on viral transmission. The value of the multiplicative factor  $\alpha$  is determined by first substitute the general value 0.002 into the formula, and then plot the observed case count vs. predicted one, to find the extent of underestimation or overestimation.

Substitute data from the past two months, a good prediction performance was obtained for this short-term model, with the predicted values significantly correlated to the observed ones for

1  
2  
3 most areas (Fig. 3). However, only the extant confirmed case count data could not predict the  
4  
5 new case count 3~7 days later as well as the weather-combined model did (Fig. S2).  
6

### 7 Different modes of viral transmission illustrated by the model

8  
9  
10 The observed versus predicted data exhibited different correlation patterns for different areas,  
11  
12 meaning different viral transmission modes, which may indicate the effect of epidemic control  
13  
14 for certain area.  
15

16  
17 Data from Chinese top-affected cities were not very well predicted and obviously  
18  
19 overestimated by this model with the default multiplicative factor  $\alpha$  (Pearson's correlation  
20  
21 coefficient  $r = 0.31$ ,  $p < 0.001$ ; Fig. 3A). It might be due to the reason that most Chinese cities  
22  
23 took actions quickly after the outbreak in Wuhan was reported, thus, these cities were under strict  
24  
25 epidemic prevention measures at the beginning of the pandemic. This viral transmission mode  
26  
27 suggested by the not well correlated prediction pattern is called "restricted".  
28  
29

30  
31 For Wuhan city and some early outbreak countries (Japan, Korea, Iran, and Italy), the  
32  
33 predicted outbreak was well correlated with the actual observations at the beginning when the  
34  
35 extant confirmed cases were not in very large numbers, but the prediction deviates from the  
36  
37 observation as the confirmed cases increase, in detail, there's large overestimation of prediction  
38  
39 ( $r_{\text{Wuhan}} = 0.47$ ,  $p = 0.02$ ,  $r_{\text{Italy}} = 0.86$ ,  $r_{\text{Japan}} = 0.71$ ,  $r_{\text{Iran}} = 0.64$ ,  $p < 0.001$ ,  $r_{\text{Korea}} = 0.06$ ,  $p = 0.68$ ;  
40  
41 Fig. 3B). It is of notice that the dramatic deviation of predictions for Wuhan occurred after  
42  
43 February 15, the day when shelter hospitals had been put into use for seven days (the average  
44  
45 latency period for COVID-19). Therefore, the deviated prediction pattern indicates that the  
46  
47 outbreak prevention and control taken in these areas is effective (so-called "controlled" mode).  
48  
49 The number of cases had been decreased by 82% for Wuhan, over 95% for Korea, Japan, and  
50  
51 Italy, and 52% for Iran at most due to epidemic control (the largest gap between prediction and  
52  
53 observation).  
54  
55  
56  
57  
58  
59  
60

1  
2  
3 For most European and American countries, the predicted outbreak was linear correlated  
4 with the observed data very well ( $r_{\text{France}} = 0.96$ ,  $r_{\text{United States}} = 0.92$ ,  $r_{\text{United Kingdom}} = 0.92$ ,  $r_{\text{Spain}} =$   
5  $0.84$ ,  $r_{\text{Germany}} = 0.73$ ,  $p < 0.001$ ; Fig. 3C), suggesting a natural viral transmission mode without  
6 much man-made epidemic prevention and control measures. Estimation of daily new case counts  
7 by this short-term model performed very well for European countries, while this model  
8 underestimated the outbreak in the United States.  
9

10  
11 Although the weather is not suitable for tropical areas, the viral transmitted in natural mode,  
12 manifested as good linear correlation between the prediction and the observation ( $r_{\text{India}} = 0.95$ ,  
13  $r_{\text{Singapore}} = 0.84$ ,  $r_{\text{Thailand}} = 0.82$ ,  $p < 0.001$ ; Fig. 3D), with just relatively small daily new case  
14 counts compared to temperate regions.  
15

16  
17 Countries in the southern atmosphere displayed similar pattern as the "controlled" with large  
18 overestimation by the model when the confirmed cases increase, leading to not good prediction  
19 performance ( $r_{\text{Australia}} = 0.28$ ,  $p = 0.04$ ,  $r_{\text{South Africa}} = 0.03$ ,  $p = 0.87$ ; Fig. 3E). It might be due to the  
20 effect of epidemic prevention measures in these countries.  
21

### 22 Long-term simplified model

23  
24 For long-term prediction, another simplified model with average temperature as a weather factor  
25 was derived as follows:  
26

$$27 \text{ new case count} = (-0.14 \times T^2 + 0.93 \times T + 100) \times \beta \times \text{Extant Case Count}$$

28 where T is temperature in °C,  $\beta$  is a site-related constant, with a default of 0.003. All parameters  
29 take values 7 days before the day new case count is evaluated.  
30

31 With the model, the prediction performance was still good ( $r = 0.64$  in the current datasets,  $p <$   
32  $0.001$ ; Fig. 3F). The long-term simplified prediction model also showed five prediction-  
33

1  
2  
3 observation correlation patterns, indicating different modes of viral transmission, for the studied  
4  
5 areas.  
6  
7

## 8 **Discussion**

9

10  
11 This research discovers nonlinear dose-response relationship for meteorological factors, in  
12  
13 consistency with previous studies (10). Predictions of COVID-19 outbreak scale by the models  
14 5  
15 were well correlated with the observations around the world, suggesting the importance of  
16  
17 weather in SARS-CoV-2 transmission. Previous studies have implied the spread of many  
18  
19 respiratory infectious diseases, such as influenza, is dependent upon temperature and relative  
20  
21 humidity (5,6). Recent published papers on preprint servers have reported roles of temperature  
22  
23 and absolute humidity in the COVID-19 transmission, but their conclusions are diverse (8-13). In  
24  
25 10  
26 contrast to the findings by Cai et al (8), this study suggests significant impact of mean  
27  
28 temperature on the daily new case count, indicating a need for sufficient time delay between  
29  
30 exposure and confirmation for weather to exhibit its effect. In contrary to other two studies (9,10),  
31  
32 this research suggests that there is a relatively not wide temperature and humidity ranges for the  
33  
34 pandemic. There is an optimal temperature for SARS-CoV-2 at 7.9 °C, which is colder than that  
35  
36 suggested by Bu et al (12) but in consistency with the estimation by Wang et al (10); and most  
37 15  
38 areas with large spread locate in the humidity range of 60% ~ 90%, more humid than Bu et al  
39  
40 suggested (12). It is of notice that different from other viral respiratory diseases such as influenza,  
41  
42 high relative humidity is better for SARS-CoV-2 to spread, suggesting that a sufficient amount of  
43  
44 droplets in the air to support the suspension of SARS-CoV-2 is more important for the spread  
45  
46 than the effect of dry air on the human immune system. Different from other studies (13), this  
47  
48 20  
49 study also finds significant involvement of wind speed, in a quadric manner, indicating that mild  
50  
51 wind might be more suitable for the virus to suspend in the air. In addition, the current study  
52  
53  
54  
55  
56  
57  
58  
59  
60

1  
2  
3 discovered that visibility was significantly negatively correlated with new case count and played  
4 a more important role in viral spread than humidity did. New case count decreases rapidly when  
5 visibility is high than 13 statute miles, indicating that caution should be taken if visibility drops  
6 below 10 statute miles.  
7  
8  
9  
10

11  
12  
13 5 In the prediction model, there is a constant multiplicative factor which determines the strength of  
14 the weather coefficient on the epidemic transmission. It seems site-specific, as adjusting it could  
15 make the prediction for one site very close to the observation. This constant might reflect the  
16 influence of epidemic management and control measures. Various degrees of isolation for various  
17 areas around the world lead to different degrees of weather effect. When evaluate the prediction  
18 performance by the short-term model and the long-term model, they both exhibit different  
19 prediction-observation correlation patterns, suggesting that changes in the degree of epidemic  
20 control and isolation policy would lead to deviation from the original prediction and thus  
21 different prediction-observation correlation patterns. Therefore, by plotting the predicted versus  
22 observed new case counts and adjusting the multiplicative factor ( $\alpha$  and  $\beta$ ), it would be easy to  
23 evaluate the effect of epidemic prevention measures. It is of notice that the observed case counts  
24 dropped dramatically from the predictions for Wuhan seven days after their shelter hospitals were  
25 put in use, suggesting the importance and necessity of building shelter hospitals for strict  
26 isolation rather than just home isolation. With the use of shelter hospitals and very strict isolation  
27 measures, the outbreak in one area could be reduced by 52~99% compared to natural  
28 transmission mode. Another thing worth attention is that although the weather in tropical areas  
29 like India is not suitable for viral survival and transmission, SARS-CoV-2 still keeps on  
30 spreading in a linear fashion in these areas, with just low growth rate of the outbreak. Therefore,  
31 these tropical areas should still be on the alert against future outbreak of COVID-19.  
32  
33  
34  
35  
36 15  
37  
38  
39  
40  
41  
42  
43  
44  
45  
46  
47 20  
48  
49  
50  
51  
52  
53  
54  
55  
56  
57  
58  
59  
60

1  
2  
3 Although those cases with travel history to China or indicated by the World Health Organization  
4 as "imported case only" were excluded in this study, leaving the world data most likely local  
5 transmitted, it's difficult to separate the imported cases from local transmission very well in  
6 practice, which might explain the not excellent correlations of predictions with observations.  
7  
8 Furthermore, the relationship of weather and COVID-19 could be complex, since the human  
9 immune system has an innate seasonal rhythm, and the immune system could also be affected by  
10 weather *vice versa*, for example, dry air would reduce the amount of mucus on the airway  
11 mucosa, and thus increasing the probability of viral invasion, while wet air provides droplets for  
12 virus to adhere.  
13  
14

15  
16  
17  
18  
19  
20  
21  
22  
23  
24 In summary, this study has found significant correlations with the COVID-19 epidemic trend for  
25 not only temperature and humidity, but also wind speed and visibility. It proposed a  
26 comprehensive model for prediction of COVID-19 outbreak, composed of a short-term version  
27 and a long-term version. The short-term version uses the combination of four meteorological  
28 factors as a "weather coefficient" of the extant case count in the past week and can be used to  
29 predict epidemic situation in the future three days; the short-term version uses average  
30 temperature as the "weather coefficient" seven days ago and can predict the outbreak in one  
31 month if combined with weather forecast. This model is easy to use for predicting the COVID-19  
32 outbreak, by substituting weather data in the recent past week and obtaining an estimate of case  
33 count for the future couple of days or month. This model will be very helpful for local  
34 governments to make timely policies on epidemic control, for instance, the allocation of medical  
35 equipments such as ventilators and medical resources such as hospitals, beds and health-care  
36 workers, according to the prediction results.  
37  
38  
39  
40  
41  
42  
43  
44  
45  
46  
47  
48  
49  
50  
51  
52  
53  
54  
55  
56  
57  
58  
59  
60



**Acknowledgments:** We thank Dr. Zhisheng Huang for advices on data collecting and processing, Dr. Siyuan Tan for technical support on analysis, Dr. Yonggao Chen for mathematical support on modeling.

**Funding:** the Priority Academic Program Development of Jiangsu Higher Education Institutions – the third period (NO.035062002003c).

**Author contributions:** BC, YZ and XZ design and interpret the reported analyses and results; HL, XY, YH, BZ, and MX participated in the acquisition of data; BC analyse data; BC drafted the manuscript; HL and XZ revised the manuscript; YZ and FT provided technical support; XZ supervised the research.

**Competing interests:** Authors declare no competing interests.

**Data and materials availability:** Weather data and epidemiological data is all obtained from public databases. Detailed modeling results are available upon request by emailing Biqing Chen, bq\_chen@qq.com.

## References:

1. Zhu N, Zhang D, Wang W, et al. A novel coronavirus from patients with pneumonia in China, 2019. *N Engl J Med.* 2020;382(8):727–33.
2. Li Q, Guan X, Wu P, et al. Early transmission dynamics in Wuhan, China, of novel coronavirus–infected pneumonia. *N Engl J Med.* 2020;382(13):1199–207.
3. Chan JFW, Yuan S, Kok KH, et al. A familial cluster of pneumonia associated with the 2019 novel coronavirus indicating person-to-person transmission: a study of a family cluster. *Lancet.* 2020;395(10223):514–23.

- 1  
2  
3 4. World Health Organization. 2020. [https://www.who.int/emergencies/diseases/novel-](https://www.who.int/emergencies/diseases/novel-coronavirus-2019/situation-reports)  
4 coronavirus-2019/situation-reports (29 March 2020, date last accessed).  
5  
6  
7
- 8 5. Barreca AI, Shimshack JP. Absolute humidity, temperature, and influenza mortality: 30  
9 years of county-level evidence from the United States. *Amer J Epidemiol.* 2012;176(suppl.  
10 7):S114–22.  
11  
12
- 13 6. Lowen AC, Mubareka S, Steel J, Palese P. Influenza virus transmission is dependent on  
14 relative humidity and temperature. *PLoS Pathol.* 2007;3:e151.  
15  
16  
17
- 18 7. Bourouiba L. Turbulent gas clouds and respiratory pathogen emissions potential  
19 implications for reducing transmission of COVID-19. *JAMA.* 2020;E1–2.  
20  
21  
22
- 23 8. Cai Y, Huang Sr. T, Liu Sr. X, Xu Sr. G. The effects of "Fangcang, Huoshenshan, and  
24 Leishenshan" makeshift hospitals and temperature on the mortality of COVID-19. Preprint  
25 at Med RXIV. 2020. <https://www.medrxiv.org/content/10.1101/2020.02.26.20028472v3>  
26 10 (29 March 2020, date last accessed).  
27  
28  
29  
30  
31  
32  
33  
34
- 35 9. Bannister-Tyrrell M, Meyer A, Faverjon C, Cameron A. Preliminary evidence that higher  
36 temperatures are associated with lower incidence of COVID-19, for cases reported  
37 globally up to 29th February 2020. Preprint at Med RXIV. 2020.  
38 15 <https://www.medrxiv.org/content/10.1101/2020.03.18.20036731> (29 March 2020, date last  
39 accessed).  
40  
41  
42  
43  
44  
45  
46
- 47 10. Wang M, Jiang A, Gong L, et al. Temperature significantly change COVID-19  
48 transmission in 429 cities. Preprint at Med RXIV. 2020.  
49 <https://www.medrxiv.org/content/10.1101/2020.02.22.20025791v1> (29 March 2020, date  
50 20 last accessed).  
51  
52  
53  
54  
55  
56  
57  
58  
59  
60

- 1  
2  
3 11. Luo W, Majumder MS, Liu D, et al. The role of absolute humidity on transmission rates of  
4 the COVID-19 outbreak. Preprint at Med RXIV. 2020.  
5  
6 <https://www.medrxiv.org/content/10.1101/2020.02.12.20022467v1> (29 March 2020, date  
7 last accessed).  
8  
9  
10  
11  
12 5 12. Bu J, Peng D-D, Xiao H, et al. Analysis of meteorological conditions and prediction of  
13 epidemic trend of 2019-nCoV infection in 2020. Preprint at Med RXIV. 2020.  
14  
15 <https://www.medrxiv.org/content/10.1101/2020.02.13.20022715v1> (29 March 2020, date  
16 last accessed).  
17  
18  
19  
20  
21  
22 13. Oliveiros B, Caramelo L, Ferreira NC, Caramelo F. Role of temperature and humidity in  
23 the modulation of the doubling time of COVID-19 cases. Preprint at Med RXIV. 2020.  
24  
25 10 <https://www.medrxiv.org/content/10.1101/2020.03.05.20031872v1> (29 March 2020, date  
26 last accessed).  
27  
28  
29  
30  
31  
32 14. COVID-19/2019-nCoV Infection Time Series Data Warehouse. 2020.  
33  
34 <https://github.com/BlankerL/DXY-COVID-19-Data> (9 April 2020, date last accessed).  
35  
36  
37 15. Integrated Surface Database of USA National Centers for Environmental Information.  
38 15 2020. <ftp://ftp.ncdc.noaa.gov/pub/data/noaa/2020/> (9 April 2020, date last accessed).  
39  
40  
41  
42 16. R Core Team, R: A language and environment for statistical computing. R Foundation for  
43 Statistical Computing. 2018. <https://cran.r-project.org/bin/windows/base/old/3.5.1/> (9  
44 January 2020, date last accessed).  
45  
46  
47  
48  
49  
50 20  
51  
52  
53  
54  
55  
56  
57  
58  
59  
60

## FIGURE LEGENDS

**Fig. 1.** Loess regression interpolation of confirmed new case counts to the four meteorological variables, (A) average temperature (T) in °C, (B) relative humidity (RH) in %, (C) wind speed (SPD) in miles per hour, (D) visibility (VSB) in statute miles, for Wuhan city. Five time delay of the confirmation day (when epidemiological data were correlated) from the exposure day (when weather data was correlated) are displayed together in one figure, namely, exposure on the day, three days before, seven days before, 3~7 days before, and 14 days before.

**Fig. 2.** Scatterplots of confirmed new case counts to the four meteorological variables, (A) average temperature (T) in °C, (B) relative humidity (RH) in %, (C) wind speed (SPD) in miles per hour, (D) visibility (VSB) in statute miles, for all the studied datasets. Quadric regression for T, RH, and SPD, and linear regression for VSB are illustrated for each dataset. Interpolation curves with 95% confidence intervals are shown in shadow. The discovery dataset includes the major outbreak Chinese cities, the replication\_Italy dataset is provincial data in Italy, the replication\_world dataset is national data around the world excluding China, Italy, India, Australia, and South Africa.

**Fig. 3.** The observed daily new case counts versus the predicted values by the short-term model (A-E) and the long-term model (F) are illustrated for all the studied areas. The plots exhibit five prediction-observation correlation patterns, which indicates five viral transmission modes: (A) the "restricted" pattern including the Chinese top affected cities excluding Wuhan; (B) the "controlled" pattern including early outbreak areas, namely, Iran, Italy, Japan, and Korea, and Chinese Wuhan city; (C) the "natural" pattern including late outbreak European and American countries, namely, France, Germany, Spain, United Kingdom, and United States; (D) the

1  
2  
3 "tropical" pattern including tropical countries India, Singapore, and Thailand; (E) the "southern"  
4  
5 pattern including countries in the southern atmosphere, Australia and South Africa. Each dot  
6  
7 represents one day. Loess regression (A, B, E) and linear regression (C, D) interpolation curves  
8  
9 with 95% confidence intervals in shadow are illustrated for each dataset. The black solid line  
10  
11 represents that the observed values are equal to the predicted ones, and dots closer to this line  
12 5  
13 means better prediction performance.  
14  
15  
16  
17  
18  
19  
20  
21  
22  
23  
24  
25  
26  
27  
28  
29  
30  
31  
32  
33  
34  
35  
36  
37  
38  
39  
40  
41  
42  
43  
44  
45  
46  
47  
48  
49  
50  
51  
52  
53  
54  
55  
56  
57  
58  
59  
60

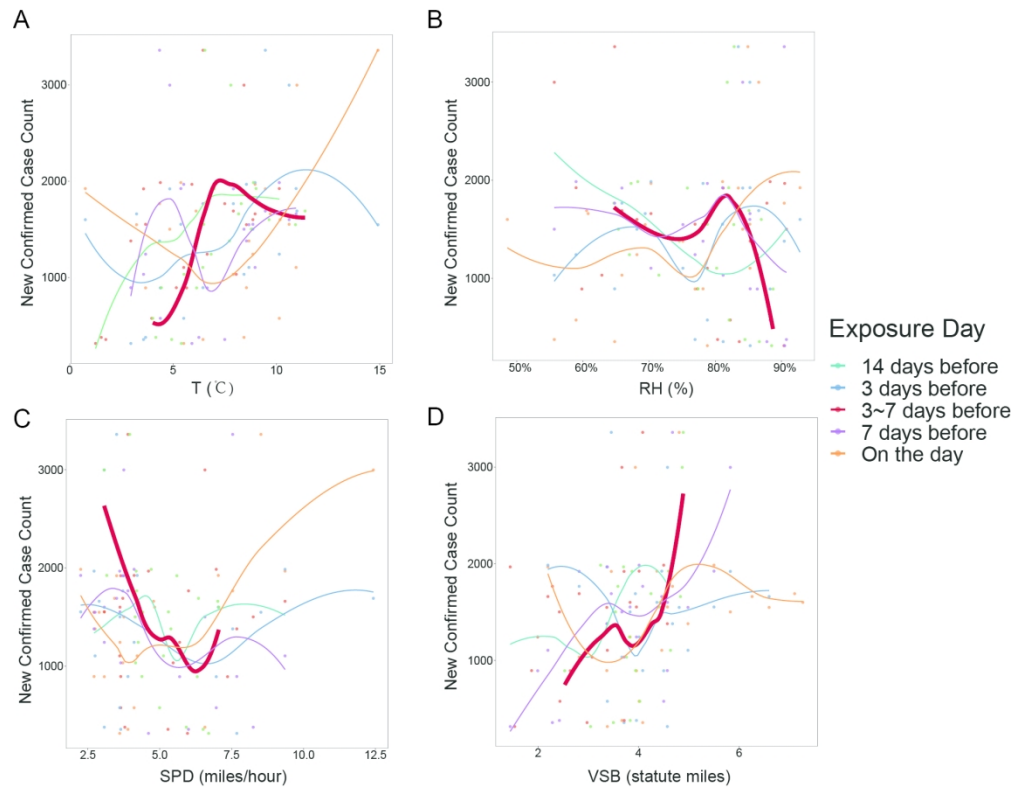

Fig 1. Loess regression interpolation of confirmed new case counts to the four meteorological variables, (A) average temperature (T) in °C, (B) relative humidity (RH) in %, (C) wind speed (SPD) in miles per hour, (D) visibility (VSB) in statute miles, for Wuhan city. Five time delay of the confirmation day (when epidemiological data were correlated) from the exposure day (when weather data was correlated) are displayed together in one figure, namely, exposure on the day, three days before, seven days before, 3~7 days before, and 14 days before.

168x132mm (300 x 300 DPI)

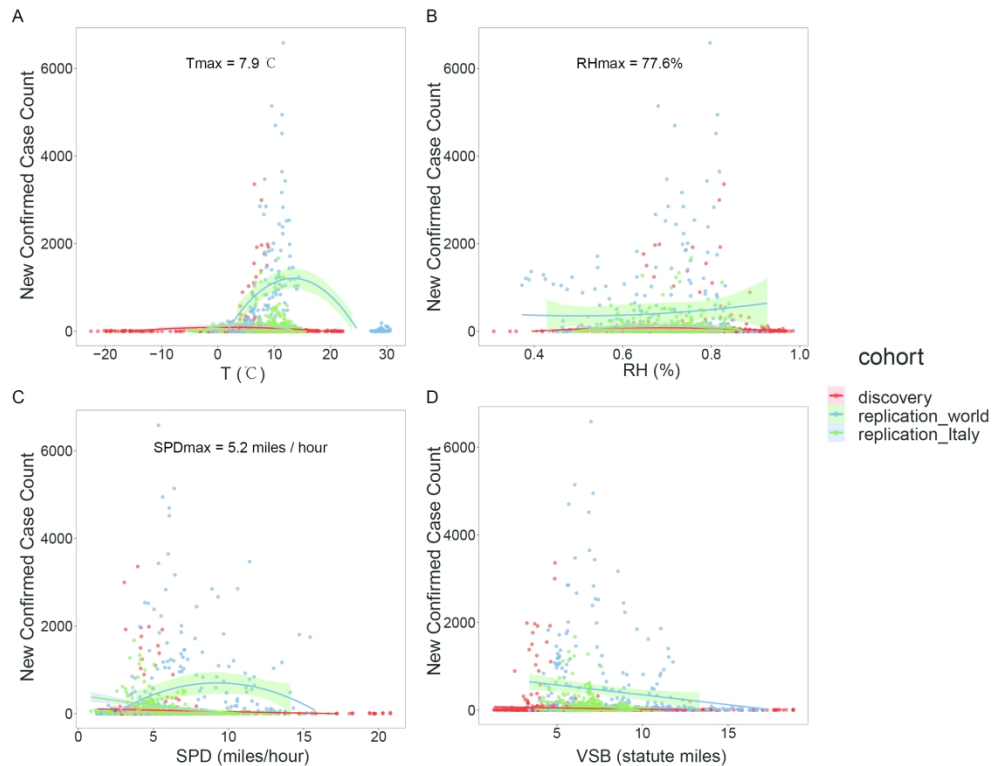

Fig 2. Scatterplots of confirmed new case counts to the four meteorological variables, (A) average temperature (T) in °C, (B) relative humidity (RH) in %, (C) wind speed (SPD) in miles per hour, (D) visibility (VSB) in statute miles, for all the studied datasets. Quadric regression for T, RH, and SPD, and linear regression for VSB are illustrated for each dataset. Interpolation curves with 95% confidence intervals are shown in shadow. The discovery dataset includes the major outbreak Chinese cities, the replication\_Italy dataset is provincial data in Italy, the replication\_world dataset is national data around the world excluding China, Italy, India, Australia, and South Africa.

241x183mm (300 x 300 DPI)

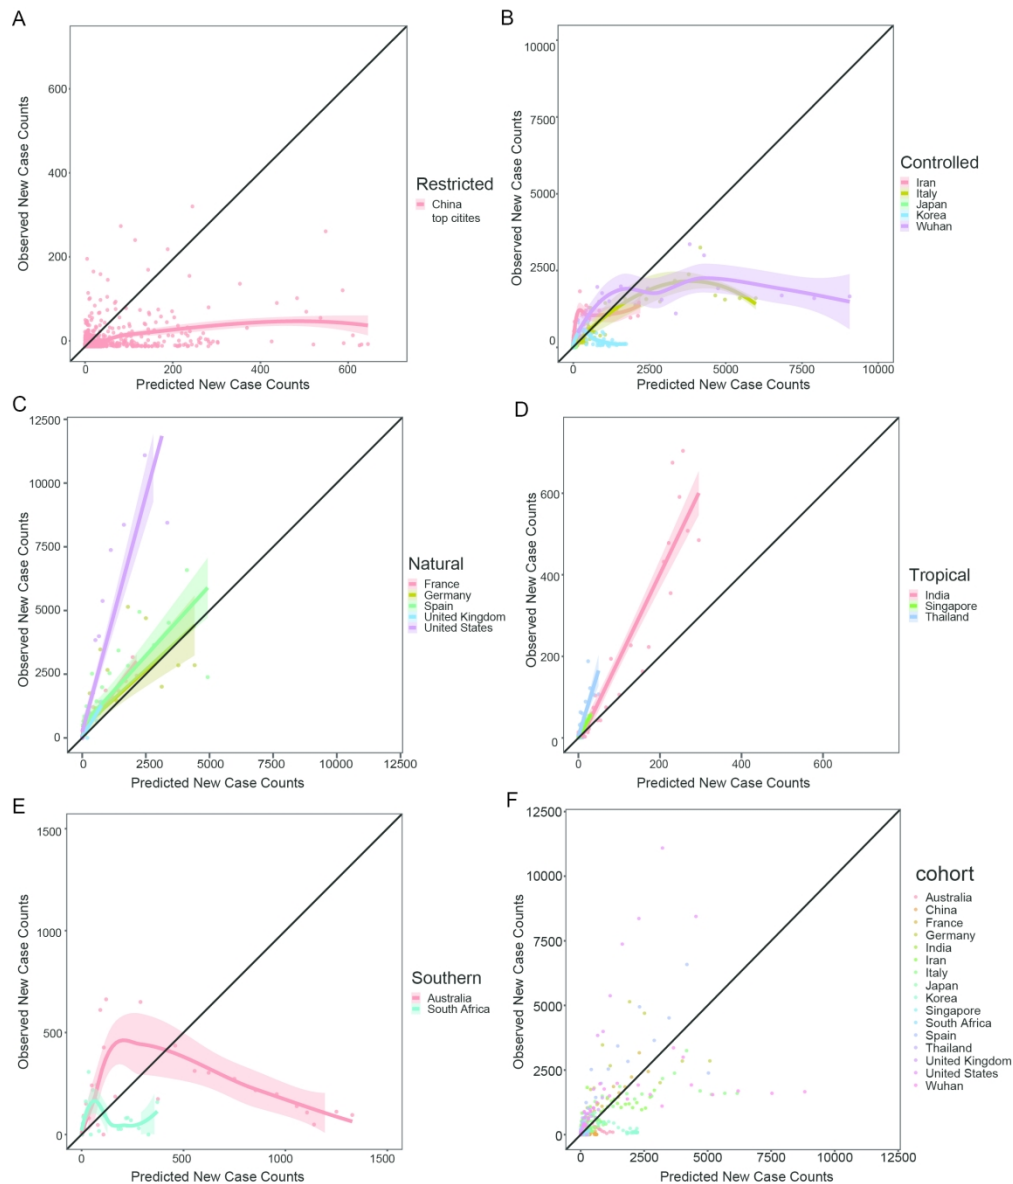

Fig 3. The observed daily new case counts versus the predicted values by the short-term model (A-E) and the long-term model (F) are illustrated for all the studied areas. The plots exhibit five prediction-observation correlation patterns, which indicates five viral transmission modes: (A) the "restricted" pattern including the Chinese top affected cities excluding Wuhan; (B) the "controlled" pattern including early outbreak areas, namely, Iran, Italy, Japan, and Korea, and Chinese Wuhan city; (C) the "natural" pattern including late outbreak European and American countries, namely, France, Germany, Spain, United Kingdom, and United States; (D) the "tropical" pattern including tropical countries India, Singapore, and Thailand; (E) the "southern" pattern including countries in the southern atmosphere, Australia and South Africa. Each dot represents one day. Loess regression (A, B, E) and linear regression (C, D) interpolation curves with 95% confidence intervals in shadow are illustrated for each dataset. The black solid line represents that the observed values are equal to the predicted ones, and dots closer to this line means better prediction performance.

203x240mm (300 x 300 DPI)



1  
2  
3  
4  
5  
6  
7  
8  
9  
10  
11  
12  
13  
14  
15  
16  
17  
18  
19  
20  
21  
22  
23  
24  
25  
26  
27  
28  
29  
30  
31  
32  
33  
34  
35  
36  
37  
38  
39  
40  
41  
42  
43  
44  
45  
46  
47  
48  
49  
50  
51  
52  
53  
54  
55  
56  
57  
58  
59  
60

## Supplementary Materials and Methods

### Epidemiological data

Considering the potential confounding effect, only cities with no less than 50 cumulative confirmed cases in one month and without official reports of large imported cases were taken as the discovery dataset. The countries with high COVID-19 incidence except China, namely, United States, United Kingdom, Germany, France, Italy, Spain, Iran, Korea, Japan, and southern atmosphere countries Australia and South Africa, and tropical countries India, Thailand, and Singapore, were selected for replication representing the world's situation.

We scrutinized WHO's situation reports to rule out these countries with only imported cases, and only collected the confirmed cases with possible or confirmed local transmission (i.e., without recent travel history to China).

For Wuhan city, there was a shortage of test kits at the beginning of the pandemic, which would make confirmed case counts much lower than the actual data, thus, we discarded epidemic data before January 28th, the day when domestic test kits have been approved, produced in large quantities, and were available for Wuhan hospitals. As there was a cut down problem for the extant confirmed case count on February 20th for Wuhan, when modeling with the extant confirmed case count, only data before February 20th were used.

### Weather data

Temperature and dew point displayed in Fahrenheit were transformed into Celsius forms, and relative humidity was calculated from temperature and dew point

using the following formula for each time point:

$$RH = \begin{cases} e^{\frac{7.5D}{237.3+D} - \frac{7.5T}{237.3+T}} \times 100\%, & T < 0 \\ 10^{\frac{7.5D}{237.3+D} - \frac{7.5T}{237.3+T}} \times 100\%, & T \geq 0 \end{cases}$$

where RH is the relative humidity, D is the dew point in degrees Celsius, T is the temperature in degrees Celsius, and  $e$  is the base of the natural log.

For each city with epidemiological data, the meteorological station in that city or that was closest to the latitude and longitude coordinates of the city center was chosen. For a city with more than one meteorological stations, the one nearest to the city center was chosen. For a province with epidemiological data, the meteorological station in the capital city of that province was chosen. For a country with only national wide epidemiological data, weather data were averaged across all the meteorological observatories in the cities where outbreak was officially reported. Latitude and elevation for the meteorological observatories were also collected.

### Statistical modeling

At first, each meteorological variable was plotted against the confirmed new case counts for the Wuhan dataset. Only one city Wuhan was chosen for illustrating the time delay effect because it is the first city to have an outbreak of COVID-19, there was none reported imported cases for Wuhan, which might obscure the correlation between weather and virus transmission. After choosing the appropriate time delay, data from the discovery dataset were fitted into generalized linear model or non-linear model (basically polynomial models) according to the identified relationship by Loess regression and knowledge of droplet-mediated viral diseases. Each of the four

1  
2  
3  
4 meteorological variables was fitted into models solely, and then all variables were  
5  
6 combined together to compose a comprehensive coefficient that was multiplied with  
7  
8 the extant confirmed case counts. All the models were compared with each other to  
9  
10 find a best-fitted model with the best fitness. Fitness was evaluated according to  
11  
12 log-likelihood, Akaike information criterion, and Bayesian Information Criterion. The  
13  
14 final equation supposed that all the meteorological variables composed a coefficient  
15  
16 which was multiplied by the extant confirmed case counts on the exposure day, and  
17  
18 then derived the new confirmed case counts on the test day.  
19  
20  
21  
22  
23

## 24 **Supplementary Results**

### 25 Datasets description

26  
27  
28  
29  
30 Only Chinese cities with monthly confirmed cases over 50 were included in the  
31  
32 discovery dataset, which was 60 cities including Wuhan. The confirmed new cases in  
33  
34 Wuhan on February 13, 2020, reached 13,436, which was oddly high as the daily  
35  
36 confirmed new cases were no larger than 3,000 on all the other dates in Wuhan or in  
37  
38 all the other Chinese cities. We suppose that it might be due to abrupt large  
39  
40 supplement of virus test kits on that day. In order to reduce the potential  
41  
42 contamination of modeling by this outlier, we substituted the counts on that day by  
43  
44 four, that was  $13,436/4=3,359$ , which was still the largest number but not deviated  
45  
46 from the dataset too much. There were also two oddly large new confirmed case  
47  
48 counts for Lombardy, which were discarded from the subsequent analysis. Except the  
49  
50 outliers, the daily confirmed new cases in the discovery dataset ranged from 1 to  
51  
52 2,997, the average temperature ranged  $-23.54^{\circ}\text{C} \sim 22.85^{\circ}\text{C}$ , the wind speed ranged  
53  
54  
55  
56  
57  
58  
59  
60

1  
2  
3  
4 1.33 ~ 26 miles per hour, visibility ranged 0.425 ~ 110 statute miles to nearest tenth,  
5  
6 and relative humidity ranged 31.4% ~ 100%.  
7  
8  
9  
10  
11  
12  
13  
14  
15  
16  
17  
18  
19  
20  
21  
22  
23  
24  
25  
26  
27  
28  
29  
30  
31  
32  
33  
34  
35  
36  
37  
38  
39  
40  
41  
42  
43  
44  
45  
46  
47  
48  
49  
50  
51  
52  
53  
54  
55  
56  
57  
58  
59  
60

For peer review only

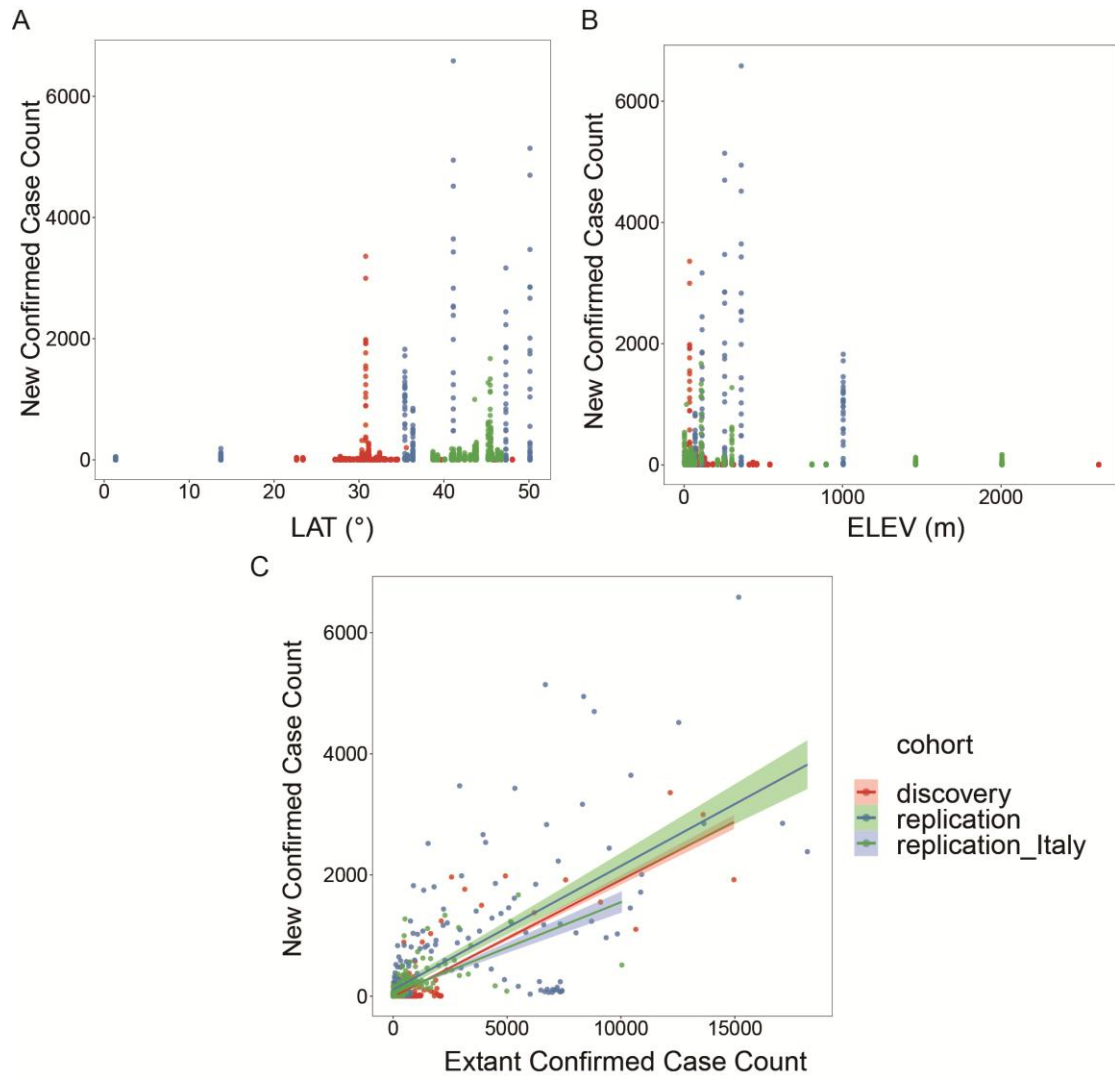

**Fig. S1.** Scatterplots of new confirmed case count to (A) latitude, (B) elevation, and (C) the extant confirmed case count, for all the studied sites.

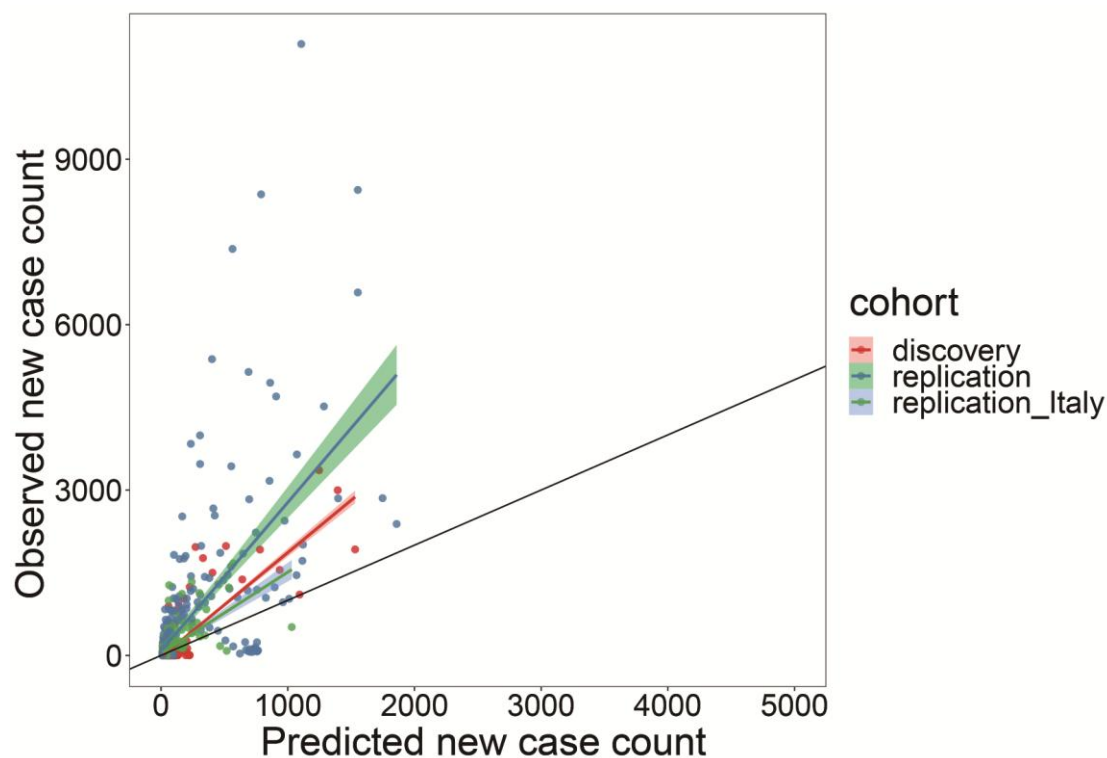

**Fig. S2.** The observed daily new case counts verse the predicted values by only the extant confirmed case count are illustrated for all cohorts. Linear regression interpolation curves with 95% confidence intervals in shadow are illustrated for each dataset. The black solid line represents that the observed values are equal to the predicted ones.

# BMJ Open

## Predicting the local COVID-19 outbreak around the world with meteorological conditions: a model-based qualitative study

|                                 |                                                                                                                                                                                                                                                                                                                                                                                                                                                                                                                                                                                                                                                                                                                                                                                                                                                                                                                                                                             |
|---------------------------------|-----------------------------------------------------------------------------------------------------------------------------------------------------------------------------------------------------------------------------------------------------------------------------------------------------------------------------------------------------------------------------------------------------------------------------------------------------------------------------------------------------------------------------------------------------------------------------------------------------------------------------------------------------------------------------------------------------------------------------------------------------------------------------------------------------------------------------------------------------------------------------------------------------------------------------------------------------------------------------|
| Journal:                        | <i>BMJ Open</i>                                                                                                                                                                                                                                                                                                                                                                                                                                                                                                                                                                                                                                                                                                                                                                                                                                                                                                                                                             |
| Manuscript ID                   | bmjopen-2020-041397.R1                                                                                                                                                                                                                                                                                                                                                                                                                                                                                                                                                                                                                                                                                                                                                                                                                                                                                                                                                      |
| Article Type:                   | Original research                                                                                                                                                                                                                                                                                                                                                                                                                                                                                                                                                                                                                                                                                                                                                                                                                                                                                                                                                           |
| Date Submitted by the Author:   | 14-Aug-2020                                                                                                                                                                                                                                                                                                                                                                                                                                                                                                                                                                                                                                                                                                                                                                                                                                                                                                                                                                 |
| Complete List of Authors:       | Chen, Biqing; Affiliated Hospital of Nanjing University of Chinese Medicine, Research Center of Chinese Medicine<br>Liang, Hao ; Affiliated Hospital of Nanjing University of Chinese Medicine, Department of Hematology<br>Yuan, Xiaomin ; Affiliated Hospital of Nanjing University of Chinese Medicine, Department of Colorectal Surgery<br>Hu, Yingying ; Affiliated Hospital of Nanjing University of Chinese Medicine, Department of Hematology<br>Xu, Miao; Affiliated Hospital of Nanjing University of Chinese Medicine, Department of Hematology<br>Zhao, Yating ; Nanjing University<br>Zhang, Binfen ; Affiliated Hospital of Nanjing University of Chinese Medicine, Department of Hematology<br>Tian, Fang ; Affiliated Hospital of Nanjing University of Chinese Medicine, Research Center of Chinese Medicine<br>Zhu, Xuejun ; Affiliated Hospital of Nanjing University of Chinese Medicine, Department of Hematology, Research Center of Chinese Medicine |
| <b>Primary Subject Heading</b>: | Epidemiology                                                                                                                                                                                                                                                                                                                                                                                                                                                                                                                                                                                                                                                                                                                                                                                                                                                                                                                                                                |
| Secondary Subject Heading:      | Global health, Infectious diseases, Occupational and environmental medicine, Public health, Qualitative research                                                                                                                                                                                                                                                                                                                                                                                                                                                                                                                                                                                                                                                                                                                                                                                                                                                            |
| Keywords:                       | Epidemiology < INFECTIOUS DISEASES, EPIDEMIOLOGY, Public health < INFECTIOUS DISEASES, Infection control < INFECTIOUS DISEASES, COVID-19                                                                                                                                                                                                                                                                                                                                                                                                                                                                                                                                                                                                                                                                                                                                                                                                                                    |
|                                 |                                                                                                                                                                                                                                                                                                                                                                                                                                                                                                                                                                                                                                                                                                                                                                                                                                                                                                                                                                             |

SCHOLARONE™  
Manuscripts



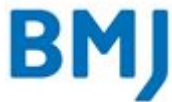

I, the Submitting Author has the right to grant and does grant on behalf of all authors of the Work (as defined in the below author licence), an exclusive licence and/or a non-exclusive licence for contributions from authors who are: i) UK Crown employees; ii) where BMJ has agreed a CC-BY licence shall apply, and/or iii) in accordance with the terms applicable for US Federal Government officers or employees acting as part of their official duties; on a worldwide, perpetual, irrevocable, royalty-free basis to BMJ Publishing Group Ltd ("BMJ") its licensees and where the relevant Journal is co-owned by BMJ to the co-owners of the Journal, to publish the Work in this journal and any other BMJ products and to exploit all rights, as set out in our [licence](#).

The Submitting Author accepts and understands that any supply made under these terms is made by BMJ to the Submitting Author unless you are acting as an employee on behalf of your employer or a postgraduate student of an affiliated institution which is paying any applicable article publishing charge ("APC") for Open Access articles. Where the Submitting Author wishes to make the Work available on an Open Access basis (and intends to pay the relevant APC), the terms of reuse of such Open Access shall be governed by a Creative Commons licence – details of these licences and which [Creative Commons](#) licence will apply to this Work are set out in our licence referred to above.

Other than as permitted in any relevant BMJ Author's Self Archiving Policies, I confirm this Work has not been accepted for publication elsewhere, is not being considered for publication elsewhere and does not duplicate material already published. I confirm all authors consent to publication of this Work and authorise the granting of this licence.

1  
2  
3  
4 1 **Title: Predicting the local COVID-19 outbreak around the world with**  
5  
6 2 **meteorological conditions: a model-based qualitative study**  
7  
8

9 3 **Authors:** Biqing Chen<sup>1</sup>, Hao Liang<sup>2</sup>, Xiaomin Yuan<sup>3</sup>, Yingying Hu<sup>2</sup>, Miao Xu<sup>2</sup>, Yating Zhao<sup>4</sup>,  
10 4 Binfen Zhang<sup>2</sup>, Fang Tian<sup>1</sup>, Xuejun Zhu<sup>1,2\*</sup>  
11  
12  
13

14  
15 5 **Affiliations:**  
16  
17

18 6 <sup>1</sup> Research Center of Chinese Medicine, Jiangsu Province Hospital of Chinese Medicine, the  
19 7 Affiliated Hospital of Nanjing University of Chinese Medicine, Nanjing, China.  
20  
21

22 8 <sup>2</sup> Department of Hematology, Jiangsu Province Hospital of Chinese Medicine, the Affiliated  
23 9 Hospital of Nanjing University of Chinese Medicine, Nanjing, China.  
24  
25

26 10 <sup>3</sup> Department of Colorectal Surgery, Jiangsu Province Hospital of Chinese Medicine, the  
27 11 Affiliated Hospital of Nanjing University of Chinese Medicine, Nanjing, China.  
28  
29

30 12 <sup>4</sup> School of Atmospheric Sciences, Nanjing University, Nanjing, China  
31  
32

33 13 \*Correspondence to: Xuejun Zhu, zhuxuejun@njucm.edu.cn.  
34  
35

36 14  
37 15 **Abstract**  
38  
39

40 16 **OBJECTIVE:** This study aims to investigate the relationship between daily weather and  
41 17 transmission rate of SARS-CoV-2, and to develop a generalized model for future prediction of  
42 18 the COVID-19 spreading rate for a certain area with meteorological factors.  
43  
44

45 19 **METHODS AND ANALYSIS:** We collected 382,596 records of weather data with four  
46 20 meteorological factors, i.e., average temperature, relative humidity, wind speed, and visibility,  
47 21 and 15,192 records of epidemic data with daily new confirmed case counts (1,587,209 confirmed  
48  
49  
50  
51  
52  
53  
54  
55  
56  
57  
58  
59  
60

cases in total) in nearly 500 areas worldwide from January 20 to April 9. Epidemic data were modeled against weather data to find a model that could best predict the future outbreak.

**RESULTS:** Significant correlations of the daily new confirmed case counts with the weather 3~7 days ago were found. SARS-CoV-2 is easy to spread under weather conditions of average temperature at 5~15 °C, relative humidity at 70%~80%, wind speed at 1.5~4.5 meter / second, and visibility less than 10 statute miles. A short-term model with these meteorological variables in the past 3~7 days was derived to predict the daily increase in COVID-19; and a long-term model using temperature to predict the pandemic in the next week or month was derived. Taken China as a discovery dataset, it was well validated with worldwide data. According to this model, there are five different viral transmission pattern, "restricted", "controlled", "natural", "tropical", "southern". This model's prediction performance correlates with the actual observations best (over 0.9 correlation coefficient) under natural spread mode of SARS-CoV-2 when there is not much human interference by epidemic prevention measures.

**CONCLUSION:** This model can be used for prediction of the future outbreak, and illustrating the effect of epidemic control for a certain area.

**Keywords:** COVID-19, SARS-CoV-2, weather, temperature, prediction model, epidemic control

### **Strengths and limitations of this study**

- This study investigates the role of daily weather in COVID-19 spread systematically with a comprehensive set of four meteorological factors.
- This research collected a huge amount of data, covering nearly 500 areas worldwide in a long timescale.

- 1  
2  
3 44 ● The current study proposes two prediction models on different time scales, a short-term one  
4  
5 45 integrating more detailed meteorological information which is more accurate, and a long-  
6  
7 term one with only temperature which is more feasible.  
8 46  
9  
10 47 ● The influence of weather on virus spread could be confounded by a dozen of manual  
11  
12 interventions, such as population mobility and disinfection measures, leading to inaccurate  
13 48  
14 modeling.  
15 49  
16  
17 ● The prediction model (especially the long-term model) might be unsuitable and inaccurate  
18 50  
19 for areas with hot weather.  
20 51  
21  
22  
23  
24  
25  
26  
27  
28  
29  
30  
31  
32  
33  
34  
35  
36  
37  
38  
39  
40  
41  
42  
43  
44  
45  
46  
47  
48  
49  
50  
51

## Introduction

The COVID-19 pandemic caused by SARS-CoV-2 has spread all over the world and has great social and economic impact worldwide (1,2). It exhibits high human-to-human transmissibility compared to other coronavirus like SARS (3). As of April 28 in 2020, the reported cumulative confirmed case count reached over three million and reported death is over 0.21 million globally (4). It would be crucial to predict the future trend of COVID-19 outbreak ahead, in order to make proper prevention and control strategies accordingly in time.

Besides population mobility and human-to-human contact, meteorological conditions have been suggested to be involved in the transmission of droplet-mediated viral diseases (5,6). As droplets carrying the coronavirus can travel in gaseous clouds as far as eight metres and stay suspended in the air for hours (7), the suspending time and viability of the coronavirus outside body would be largely affected by the environment. Wind speed could affect the suspending time of droplets, while visibility and humidity reflect the amount of particles in the air, determining the coronavirus payload. Temperature affects virus's viability in the environment. As SARS-CoV-2 is enveloped, it might be more vulnerable to adverse conditions like high temperature.

The impact of weather on epidemiology has been mentioned in human's history. The ancient Chinese had a theory called "Five Movement and Six Weather" to study climate change and its relationship with human health. Currently, there are a few studies on preprint servers discussing the relationship of temperature and humidity with the pandemic, but none is systematical investigation or proposes validated practical model for prediction (8-13).

Herein, this study intends to investigate the relationship between meteorological factors and epidemic transmission rate on a world scale. Four meteorological variables, i.e., average temperature, relative humidity, wind speed, and visibility, were collected as well as the confirmed

1  
2  
3 75 case counts daily for 80 days from January 20, 2020 to April 9, 2020 for nearly 500 areas around  
4  
5 76 the world, including 428 Chinese cities and areas, 18 Italian provinces, and 13 other countries.  
6  
7  
8 77 Five time point's delay of virus infection from the exposure day were considered and compared to  
9  
10 78 determine the most reasonable time point's delay. A multivariate polynomial regression model  
11  
12 79 with meteorological factors as a "weather coefficient" of the existing confirmed case count was  
13  
14 80 established in a discovery Chinese dataset, and then validated by worldwide data. Five  
15  
16 81 transmission modes, indicating different levels of epidemic control, were revealed by this model.  
17  
18  
19 82 In this view, this model can not only predict future outbreak, but also be used to evaluate the  
20  
21 83 effect of epidemic prevention measures for a certain area.  
22  
23

## 24 84 **Materials and Methods**

### 27 85 Epidemiological data

28  
29  
30 86 Epidemiological data were collected from the World Health Organization (WHO) (4),  
31  
32 87 European Centre for Disease Control and Prevention, and DXY-COVID-19-Data (10). The daily  
33  
34 88 new confirmed case counts were collected from January 20, 2020 to April 9, 2020. Incidence data  
35  
36 89 were obtained for 428 Chinese cities and districts, 18 Italian provinces, and 13 other countries,  
37  
38  
39 90 namely, United States, United Kingdom, Germany, France, Italy, Spain, Iran, Korea, Japan,  
40  
41 91 Australia, South Africa, India, Thailand, and Singapore. Considering the potential confounding  
42  
43 92 effect, only Chinese cities with no less than 50 cumulative confirmed cases in one month and  
44  
45 93 without official reports of large imported cases (42 in total) were taken as a discovery dataset,  
46  
47 94 while those for Italian provinces and all the other nations were taken as replication datasets  
48  
49  
50 95 (Supplementary Materials).  
51

### 52 96 Weather data

1  
2  
3 97 Four meteorological variables were chosen, air temperature, relative humidity, wind speed,  
4  
5 98 and visibility. Temperature could affect virus viability in the environment. Wind speed could  
6  
7 affect the suspending time of virus-attached particles. Relative humidity reflects the amount of  
8 99 droplets in the air. Visibility is influenced by the amount of particles such as dust and air  
9  
10 100 pollutants. These two parameters both affect the amount of mediator for the virus to stay in the  
11  
12 101 air. Therefore, temperature, dew point, wind speed, and visibility were collected, and relative  
13  
14 102 humidity was calculated accordingly (Supplementary Materials). We obtained hourly values of  
15  
16 103 meteorological observations and geographic factors (latitude and elevation) from the Integrated  
17  
18 104 Surface Database of USA National Centers for Environmental Information (11). Daily data were  
19  
20 105 calculated by averaging the hourly data for each variable in each day.  
21  
22  
23  
24 106  
25  
26

### 27 107 Statistical modeling

28  
29 108 The number of daily new confirmed cases was taken as a dependent variable. Four  
30  
31 109 meteorological variables, namely, average temperature, wind speed, visibility, and relative  
32  
33 110 humidity, and the existing confirmed case counts were taken as independent variables.  
34  
35 111 Considering that there is a latency stage from the day one get infected to the day being  
36  
37 112 confirmed, a time delay of the day COVID-19 was confirmed from the day weather data were  
38  
39 113 collected needs to be taken into consideration. As it is reported that the latency period for  
40  
41 114 COVID-19 is 3~7 days on average and 14 days at most, five time points delay of virus infection  
42  
43 115 were taken into consideration, that is, weather data and existing confirmed cases count data were  
44  
45 116 collected on the day, three days before, seven days before, 3~7 days before, and 14 days before  
46  
47 117 collecting the epidemiological data.  
48  
49  
50  
51

52 118 At first, each meteorological variable was fitted into a bunch of single-factor models (either  
53  
54 119 generalized linear model or polynomial model) through non-linear least squares (NLS) modeling  
55  
56  
57  
58  
59  
60

1  
2  
3 120 using Wuhan dataset under the assumption of 3~7 days exposure delay. The relationship between  
4  
5  
6 121 each meteorological variable and confirmed new case count (linear or quadric) was identified  
7  
8 122 based on model fitness (log-likelihood, Akaike information criterion, Bayesian Information  
9  
10 123 Criterion, etc.) and common knowledge of droplet-mediated viral diseases. Second, the time  
11  
12 124 delay effect was investigated in the Wuhan dataset through Loess regression interpolation and  
13  
14  
15 125 NLS modeling with the previously identified relationship for each meteorological variable. The  
16  
17 126 most possible time delay identified was taken for subsequent analyses.  
18

19 127 The contribution of each meteorological factor was investigated with the Wuhan dataset  
20  
21  
22 128 through Spearman's correlation test. Single-factor models were fitted into NLS models again with  
23  
24 129 data from the discovery dataset (all Chinese cities with monthly confirmed cases over 50) under  
25  
26 130 the assumption of previously determined relationship and pre-defined time delay, to determine  
27  
28  
29 131 the exact coefficients accompanied with each meteorological factor and to find out the most  
30  
31 132 suitable environmental condition for SARS-CoV-2. Then, two final prediction models (short-  
32  
33 133 term model and long-term model) were developed using the discovery dataset with the previously  
34  
35 134 determined coefficients. The prediction model supposed that all the meteorological variables  
36  
37  
38 135 added together to compose a coefficient which was multiplied by the existing confirmed case  
39  
40 136 count on the exposure day, and then derived the new confirmed case counts on the test day. The  
41  
42 137 short-term model took all four variables, while the long-term model only considered temperature  
43  
44  
45 138 as it is easy to be forecasted. There was a constant coefficient for the total equation, that was  
46  
47 139 multiplied by the existing confirmed case count. Its default value was obtained by model fitting  
48  
49 140 in the discovery dataset. The influence of geographic factors, i.e., latitude and elevation, was  
50  
51  
52 141 investigated with all datasets covering the world's top cities and areas. The correlation of existing  
53  
54 142 confirmed case counts with newly confirmed case counts was also investigated. Basic statistics  
55  
56 143 and modeling was conducted in R 3.5.1 (<https://cran.r-project.org/>).  
57  
58  
59  
60



### Model validation and application

The best fitted model was validated in the replication datasets (Italian city-level data and other nation-level data) by correlating the observed actual epidemiological data with the predicted values from the model in the datasets. We used these fitted models to calculate a predicted value for case counts for each studied site, and then compared this predicted value with the real observed case counts by calculating a Spearman's correlation coefficient  $\rho$  between them.

### Patient and Public Involvement

No specific patients were included in the current study. Epidemiological data were downloaded from online open-source databases. The public were not involved in the planning and design of the study.

## **Results**

### The Weather's influence on SARS-CoV-2 transmission displays 3~7 days time delay

The ranges of average temperature, relative humidity, wind speed, and visibility in the replication datasets were similar to those in the discovery dataset (see Supplementary Results for detailed datasets description). To investigate whether the influence of meteorological factors is linear or quadric, both linear and non-linear square modeling were performed under different relationship assumptions to compare model fitness statistics using the Wuhan dataset with a 3~7 days delay of infection. It was suggested that the effect of temperature and wind speed is better depicted as quadric (Table S1), which was also supported by Loess regression interpolation (Fig. 1). The mode for relative humidity and visibility was hard to be determined, as statistics supported both relationships (Table S1). Considering the common knowledge of coronavirus transmission and the trend showed by Loess regression interpolation, relative humidity exerted its impact in a quadric trend while visibility exerted its impact in a linear trend (Fig. 1, Supplementary results).

1  
2  
3 167 Furthermore, we investigated the time delay from weather exposure to COVID-19 confirmation  
4  
5  
6 168 with the above determined relationships and NLS modeling using Wuhan dataset. Model fitness  
7  
8 169 statistics showed that the number of confirmed new cases was best correlated with air  
9  
10 170 temperature 3~7 days ago, relative humidity and visibility 7 days ago, and wind speed on the  
11  
12 171 exposure day (Table S2). By comprehensive consideration of all four meteorological variables  
13  
14  
15 172 and the differences between statistics values, the weather 3~7 days ago, as well as weather one  
16  
17 173 week ago, could well predict COVID-19 outbreak. It coincided with the latency period of 3~7  
18  
19 174 days for SARS-CoV-2, that is, exposure under certain adverse weather might exhibit its effect  
20  
21  
22 175 after 3~7 days.

#### 24 176 Contribution of single meteorological factor to the outbreak

26  
27 177 In the Wuhan dataset, the new case count was significantly positively correlated with temperature  
28  
29  
30 178 (Spearman's correlation  $\rho = 0.69$ ,  $p < 0.001$ ) and visibility ( $\rho = 0.43$ ,  $p = 0.04$ ), and negatively  
31  
32 179 correlated with wind speed ( $\rho = -0.45$ ,  $p = 0.03$ ) and relative humidity ( $\rho = -0.33$ ,  $p = 0.12$ ) 3~7  
33  
34 180 days ago. It suggested that temperature was correlated with the outbreak best, followed by wind  
35  
36  
37 181 speed, visibility, and relative humidity. A model only with temperature as a parameter could  
38  
39 182 already explained 45% of the variance in the epidemic data ( $p = 4 \times 10^{-4}$ ), while wind speed and  
40  
41 183 visibility could explain over 25% of the variance. To elucidate the contribution of each  
42  
43 184 meteorological factor to the case counts and to determine the exact coefficients, we first  
44  
45  
46 185 performed single-factor regression modeling for each meteorological variable in the discovery  
47  
48 186 dataset with the relationship identified before under the assumption of 3~7 days delay of viral  
49  
50 187 infection. Temperature, relative humidity, and wind speed were fitted into quadratic models; and  
51  
52  
53 188 visibility was fitted into a linear model. According to the fitted single-factor models  
54  
55 189 (Supplementary Results), SARS-CoV-2 transmission reaches a peak when mean temperature is

1  
2  
3 190 6.18 °C (Fig. 2A), relative humidity is 78.47% (Fig. 2B), and wind speed is 1.88 meter /second  
4  
5  
6 191 (m/s) (Fig. 2C); and its transmission rate decreases with the increase of visibility (Fig. 2D). The  
7  
8 192 effects of geographic factors such as latitude and elevation, and the pure influence from the  
9  
10 193 existing case count were further investigated in the worldwide datasets (Fig. S1), illustrating that  
11  
12 COVID-19 mainly outbreaks at latitude 30°~50° (Fig. S1A) and elevation < 500 metre (Fig. S1B).  
13 194  
14  
15 195 New confirmed case count was positively correlated with the existing confirmed case count (Fig.  
16  
17 196 S1C).  
18  
19

### 20 197 Short-term prediction model

21  
22  
23 198 To deduce a practical comprehensive model, all four meteorological variables with their specific  
24  
25 199 coefficients determined by single-factor modeling were added together to form a complex short-  
26  
27 200 term model, and the existing confirmed case count was taken as a base for meteorological factors  
28  
29 to multiply (Supplementary Results). This full model was fitted with the discovery dataset to  
30 201 determine the exact values of the constant coefficient in the equation. The best-fitted short-term  
31  
32 202 model was as follows:  
33  
34 203

35  
36  
37 New Case Count

$$38 204 = (-0.11 \times T^2 + 1.40 \times T - 0.058 \times RH^2 + 9.04 \times RH - 1.36 \times SPD^2 + 5.12$$

$$39 \times SPD - 7.02 \times VSB - 126.66) \times \alpha \times \text{Existing Confirmed Case Count}$$

40  
41  
42 205 where T is temperature in °C, RH is relative humidity in percentage, SPD is wind speed in m/s,  
43  
44 VSB is visibility in statute miles,  $\alpha$  is a site-specific constant, with a default of 0.001. All  
45 206 parameters take the means of values 3~7 days before the day new case count is evaluated.  
46  
47 207  
48  
49

50 208 In this model, all the four meteorological variables are added together in their proper forms  
51  
52 209 to compose a "weather coefficient" (the equation in brackets), which affects the transmission rate  
53  
54 210 of SARS-CoV-2, and thus influences the number of people that catch infection from the existing  
55  
56  
57  
58  
59  
60

1  
2  
3 211 confirmed cases, which then determines the new confirmed case count 3~7 days later. There is a  
4  
5 212 multiplicative constant coefficient  $\alpha$  in the equation, which seems site-related. This constant  
6  
7  
8 213 coefficient could adjust the strength of the "weather coefficient" on disease transmission. When  
9  
10 214 we substitute replication datasets into this short-term model with the multiplicative constant  
11  
12 215 coefficient  $\alpha$  originally determined by the discovery dataset (which was 0.00048), an obvious  
13  
14  
15 216 underestimation of predicted values against real ones was observed although the predicted values  
16  
17 217 correlated with the real ones very well. We supposed it was due to site-specific difference in the  
18  
19 218 multiplicative constant coefficient  $\alpha$  since the discovery dataset was all Chinese areas where the  
20  
21  
22 219 pandemic had been controlled early. Thus, we further re-fitted this composed model with all  
23  
24 220 datasets to determine a more accurate value of the multiplicative constant coefficient  $\alpha$ , which  
25  
26 221 was 0.001 then. In practical application, we need to first plot the observed case count vs.  
27  
28 222 predicted one with a default  $\alpha$  value 0.001, and then examine the extent of underestimation or  
29  
30  
31 223 overestimation, to finally determine a proper multiplicative constant coefficient  $\alpha$  to adjust the  
32  
33 224 impact size of "weather coefficient" for a certain site.

35 225         Substitute data from the past two months, a good prediction performance was obtained for  
36  
37  
38 226 this short-term model, with the predicted values significantly correlated to the observed ones for  
39  
40 227 most areas (Fig. 3). However, only the existing confirmed case count data could not predict the  
41  
42 228 new case count 3~7 days later as well as the weather-combined model did (Table S3).

#### 44 45 229 Different modes of viral transmission illustrated by the model

46  
47 230         The observed versus predicted data exhibited different correlation patterns for different areas,  
48  
49 231 meaning different viral transmission modes, which may indicate the effect of epidemic control  
50  
51 232 for certain area.

53  
54 233         Data from Chinese top-affected cities were not very well predicted and obviously  
55  
56 234 overestimated by this model with the default multiplicative constant coefficient  $\alpha$  ( $\rho = 0.11$ ,  $p <$

1  
2  
3 235 0.001; Fig. 3A). It might be due to the reason that most Chinese cities took actions quickly after  
4  
5  
6 236 the outbreak in Wuhan was reported, thus, these cities were under strict epidemic prevention  
7  
8 237 measures at the beginning of the pandemic. This viral transmission mode suggested by the not  
9  
10 238 well correlated prediction pattern is called "restricted".

11  
12 239 For Wuhan city and some early outbreak countries (Japan, Korea, Iran, and Italy), the  
13  
14  
15 240 predicted outbreak was well correlated with the actual observations at the beginning when the  
16  
17 241 existing confirmed cases were not in very large numbers, but the prediction deviates from the  
18  
19 242 observation as the confirmed cases increase, in detail, there's large overestimation of prediction  
20  
21  
22 243 ( $\rho_{\text{Wuhan}} = 0.69$ ,  $\rho_{\text{Italy}} = 0.87$ ,  $\rho_{\text{Japan}} = 0.80$ ,  $\rho_{\text{Iran}} = 0.86$ ,  $p < 0.001$ ,  $\rho_{\text{Korea}} = 0.43$ ,  $p = 0.002$ ; Fig. 3B).  
23  
24 244 It is of notice that the dramatic deviation of predictions for Wuhan occurred after February 15,  
25  
26 245 the day when shelter hospitals had been put into use for seven days (the average latency period  
27  
28 246 for COVID-19). Therefore, the deviated prediction pattern indicates that the outbreak prevention  
29  
30  
31 247 and control taken in these areas is effective (so-called "controlled" mode). The number of cases  
32  
33 248 had been decreased by 72% for Wuhan, over 95% for Korea, Japan, and Italy, and 37% for Iran  
34  
35 249 at most due to epidemic control (the largest gap between prediction and observation).

36  
37  
38 250 For most European and American countries, the predicted outbreak was linear correlated  
39  
40 251 with the observed data very well ( $\rho_{\text{France}} = 0.96$ ,  $\rho_{\text{United States}} = 0.93$ ,  $\rho_{\text{United Kingdom}} = 0.83$ ,  $\rho_{\text{Spain}} =$   
41  
42 252  $0.97$ ,  $\rho_{\text{Germany}} = 0.94$ ,  $p < 0.001$ ; Fig. 3C), suggesting a natural viral transmission mode without  
43  
44  
45 253 much man-made epidemic prevention and control measures. Estimation of daily new case counts  
46  
47 254 by this short-term model performed very well for European countries, while this model  
48  
49 255 underestimated the outbreak in the United States.

50  
51 256 Although the weather is not suitable for tropical areas, the viral transmitted in natural mode,  
52  
53  
54 257 manifested as good linear correlation between the prediction and the observation ( $\rho_{\text{India}} = 0.94$ ,

1  
2  
3 258  $\rho_{\text{Singapore}} = 0.66, p < 0.001, \rho_{\text{Thailand}} = 0.56, p = 0.001$ ; Fig. 3D), with just relatively small daily  
4  
5  
6 259 new case counts compared to temperate regions.

7  
8 260 Countries in the southern hemisphere displayed similar pattern as the "controlled" with large  
9  
10 261 overestimation by the model when the confirmed cases increase, leading to not good prediction  
11  
12 262 performance ( $\rho_{\text{Australia}} = 0.79, p < 0.001, \rho_{\text{South Africa}} = 0.34, p = 0.08$ ; Fig. 3E). It might be due to  
13  
14  
15 263 the effect of epidemic prevention measures and hot summer weather in these countries.

### 16 17 264 Long-term simplified model

18  
19  
20 265 Long-term prediction depends on weather forecast, which generally reports only average  
21  
22 266 temperature. As temperature 14 days ago could predict COVID-19 outbreak as well as  
23  
24 267 temperature in a short time delay (3~7 days ago), we again performed single-factor regression  
25  
26  
27 268 modeling in the discovery dataset, taking temperature 14 days ago as an input, assuming a  
28  
29 269 quadric function (Supplementary Results). This simplified model with average temperature as a  
30  
31 270 weather factor was derived as follows:

$$32  
33  
34 271 \text{ new case count} = (-0.10 \times T^2 + 1.11 \times T + 46.42) \times \beta \times \text{Existing Confirmed Case Count}$$

35  
36  
37 272 where T is temperature in °C,  $\beta$  is a site-related multiplicative constant coefficient, with a default  
38  
39  
40 273 of 0.006. All parameters take values 14 days before the day new case count is evaluated.

41  
42 274 With the model, the prediction performance was still good ( $\rho = 0.66$  in the replication datasets,  $p$   
43  
44  
45 275  $< 0.001$ ; Fig. 3F). The long-term simplified prediction model also showed five prediction-  
46  
47 276 observation correlation patterns (Fig. 3F), indicating different modes of viral transmission, for the  
48  
49 277 studied areas. This model could directly predict the newly emerging cases 14 days later, and be  
50  
51  
52 278 used to predict COVID-19 outbreak in the future month by summing up the daily new case count  
53  
54 279 and combining weather forecast (usually available for the future 15 days).

## Discussion

This research discovers nonlinear dose-response relationship for meteorological factors, in consistency with previous studies (12). Predictions of COVID-19 outbreak scale by the models were well correlated with the observations around the world, suggesting the importance of weather in SARS-CoV-2 transmission. Previous studies have implied the spread of many respiratory infectious diseases, such as influenza, is dependent upon temperature and relative humidity (5,6). Recent published papers on preprint servers have reported roles of temperature and absolute humidity in the COVID-19 transmission, but their conclusions are diverse (8-13). In contrast to the findings by Cai et al (8), this study suggests significant impact of mean temperature on the daily new case count, indicating a need for sufficient time delay between exposure and confirmation for weather to exhibit its effect. In contrary to other two studies (9,10), this research suggests that there is a relatively not wide temperature and humidity ranges for the pandemic. There is an optimal temperature for SARS-CoV-2 at 6.18 °C, which is colder than that suggested by Bu et al (14) but in consistency with the estimation by Wang et al (12); and most areas with large spread locate in the humidity range of 60% ~ 90%, more humid than Bu et al suggested (14). It is of notice that different from other viral respiratory diseases such as influenza(15)(16), high relative humidity is better for SARS-CoV-2 to spread, suggesting that a sufficient amount of droplets in the air to support the suspension of SARS-CoV-2 is more important for the spread than the effect of dry air on the human immune system. Different from other studies (17), this study also finds significant involvement of wind speed, in a quadric manner, indicating that mild wind might be more suitable for the virus to suspend in the air. In addition, the current study discovered that visibility was significantly negatively correlated with new case count and played a more important role in viral spread than humidity did (from

1  
2  
3 303 spearman's correlation coefficient comparison). As visibility reflects the amount of particles (e.g.,  
4  
5 304 dust and air pollutants) in the air while humidity reflects the amount of water in the air, it may  
6  
7  
8 305 indicates that SARS-CoV-2 is more likely to cling to solid particles than droplets. New case  
9  
10 306 count decreases rapidly when visibility is high than 13 statute miles, indicating that caution  
11  
12 307 should be taken if visibility drops below 10 statute miles.

14  
15 308 In the prediction model, there is a multiplicative constant coefficient which determines the  
16  
17  
18 309 strength of the weather coefficient on the epidemic transmission. It seems site-specific, as  
19  
20 310 adjusting it could make the prediction for one site very close to the observation. This constant  
21  
22 311 might reflect the influence of a couple of site-specific confounding factors, such as epidemic  
23  
24 312 control measures, sun radiation, and population density. Various degrees of isolation for various  
25  
26  
27 313 areas around the world lead to different degrees of weather effect. When evaluate the prediction  
28  
29 314 performance by the short-term model and the long-term model, they both exhibit different  
30  
31 315 prediction-observation correlation patterns (Fig. 3), suggesting that changes in the degree of  
32  
33  
34 316 epidemic control and isolation policy would lead to deviation from the original prediction and  
35  
36 317 thus different prediction-observation correlation patterns. Therefore, by plotting the predicted  
37  
38 318 versus observed new case counts and adjusting the multiplicative constant coefficient ( $\alpha$  and  $\beta$ ), it  
39  
40  
41 319 would be easy to evaluate the effect of epidemic prevention measures. It is of notice that the  
42  
43 320 observed case counts dropped dramatically from the predictions for Wuhan seven days after their  
44  
45 321 shelter hospitals were put in use, suggesting the importance and necessity of building shelter  
46  
47 322 hospitals for strict isolation rather than just home isolation. With the use of shelter hospitals and  
48  
49  
50 323 very strict isolation measures, the outbreak in one area could be reduced by 52~99% compared to  
51  
52 324 natural transmission mode. Another thing worth attention is that although the weather in tropical  
53  
54 325 areas like India is not suitable for viral survival and transmission, SARS-CoV-2 still keeps on



1  
2  
3 326 spreading in a linear fashion in these areas, with just low growth rate of the outbreak. Therefore,  
4  
5 327 these tropical areas should still be on the alert against future outbreak of COVID-19.  
6  
7

8 328 Although those cases with travel history to China or indicated by the World Health Organization  
9  
10 329 as "imported case only" were excluded in this study to make the world data most likely local  
11  
12 transmitted, it was difficult to separate the imported cases from local transmission very well in  
13 330  
14 practice. It might explain the not excellent correlations of predictions with observations.  
15 331  
16 Furthermore, the relationship of weather and COVID-19 could be complex, since the human  
17 332  
18 immune system has an innate seasonal rhythm, and the immune system could also be affected by  
19  
20 333 weather *vice versa*. For example, dry air would reduce the amount of mucus on the airway  
21  
22 334  
23 mucosa, and thus increase the probability of viral invasion, while wet air would provide droplets  
24 335  
25 for virus to adhere.  
26  
27 336  
28

29 337 There are several limitations of this study. First of all, this prediction model (especially the long-  
30  
31 term model) might be more suitable and accurate for temporal areas in spring, autumn, and winter,  
32 338  
33 as the models were derived using Chinese datasets, mainly in the first three months of 2020. The  
34 339  
35 prediction became inaccurate and could be largely deviated from real observations under hot  
36 340  
37 weather, which might explain the obvious bad prediction performance for countries in the  
38  
39 341 southern hemisphere. One explanation for the inaccurate prediction in areas with high  
40  
41 342  
42 temperature could be that SARS-CoV-2 transmission in these areas was mainly not influenced by  
43 343  
44 weather, but in another direct transmission way, such as face-to-face contact or spread in  
45  
46 344  
47 gathering crowd. Second, it seems that the prediction performance drops with the increase in new  
48 345  
49 case count, suggesting that the prediction model might become inaccurate and not suitable for  
50 346  
51 very large new case count. This could be due to that there was less data points with large new  
52 347  
53 case count. Therefore, the model's prediction performance would be better with more data points,  
54  
55 348  
56  
57  
58  
59  
60

1  
2  
3 349 especially the large case count points. Third, the short-term prediction model must use all four  
4  
5 meteorological factors, while these factors are not always available for any one certain area.  
6 350  
7  
8 351 Fourth, this study included various areas covering a long period into modeling, thus, there were a  
9  
10 352 bunch of variable confounding factors, such as population mobility and disinfection measures,  
11  
12 353 which were not controlled and thus could impede the model accuracy. Fifth, as we could only  
13  
14 obtain country-level epidemiological data, the corresponding meteorological data were obtained  
15 354  
16  
17 355 for their capital cities, leading to not exact pairing of epidemiological data and meteorological  
18  
19 356 data.

## 22 357 **Conclusion**

23  
24  
25 358 In summary, this study has found significant correlations with the COVID-19 epidemic trend for  
26  
27 not only temperature and humidity, but also wind speed and visibility. It proposed a  
28 359  
29 comprehensive model for prediction of COVID-19 outbreak, composed of a short-term version  
30 360  
31 and a long-term version. The short-term version uses the combination of four meteorological  
32 361  
33 factors as a "weather coefficient" of the existing confirmed case count in the past week and can  
34 362  
35 be used to predict epidemic situation in the future three days; the short-term version uses average  
36  
37 363 temperature as the "weather coefficient" seven days ago and can predict the outbreak in one  
38  
39 364 month if combined with weather forecast. This model is easy to use for predicting the COVID-19  
40  
41 365 outbreak, by substituting weather data in the recent past week and obtaining an estimate of case  
42  
43 count for the future couple of days or month. This model will be very helpful for local  
44 366  
45 governments to make timely policies on epidemic control, for instance, the allocation of medical  
46 367  
47 equipments such as ventilators and medical resources such as hospitals, beds and health-care  
48 368  
49 workers, according to the prediction results.  
50  
51 369  
52  
53 370  
54  
55  
56 371

1  
2  
3 372 **Acknowledgments:** We thank Dr. Zhisheng Huang for advices on data collecting and processing,  
4  
5 373 Dr. Siyuan Tan for technical support on analysis, Dr. Yonggao Chen for mathematical support on  
6  
7 modeling.  
8 374  
9

10  
11 375 **Funding:** the Priority Academic Program Development of Jiangsu Higher Education Institutions  
12  
13 376 – the third period (NO.035062002003c), the Yizhong Research Fund of Jiangsu Provincial  
14  
15 377 Hospital of Chinese Medicine (Y19066).  
16  
17

18 378 **Author contributions:** BC, YZ and XZ design and interpret the reported analyses and results;  
19  
20 379 HL, XY, YH, BZ, and MX participated in the acquisition of data; BC analyse the data, drafted,  
21  
22 and revised the manuscript; HL and XZ revised the manuscript; YZ and FT provided technical  
23 380 support; XZ supervised the research.  
24  
25 381  
26  
27

28 382 **Competing interests:** Authors declare no competing interests.  
29

30  
31 383 **Data and materials availability:** Weather data and epidemiological data is all obtained from  
32  
33 384 public databases. Detailed modeling results are available upon request by emailing to Biqing  
34  
35 385 Chen, bq\_chen@qq.com.  
36  
37

## 38 386 39 40 41 387 **References:**

- 42  
43 388 1. Zhu N, Zhang D, Wang W, Li X, Yang B, Song J, et al. A novel coronavirus from patients  
44  
45 with pneumonia in China, 2019. N Engl J Med. 2020;382(8):727–33.  
46 389  
47
- 48  
49 390 2. Li Q, Guan X, Wu P, Wang X, Zhou L, Tong Y, et al. Early Transmission Dynamics in  
50  
51 391 Wuhan, China, of Novel Coronavirus–Infected Pneumonia. N Engl J Med.  
52  
53 392 2020;382(13):1199–207.  
54  
55  
56  
57  
58  
59  
60

- 1  
2  
3 393 3. Chan JFW, Yuan S, Kok KH, To KKW, Chu H, Yang J, et al. A familial cluster of  
4 pneumonia associated with the 2019 novel coronavirus indicating person-to-person  
5 394 transmission: a study of a family cluster. *Lancet* [Internet]. Elsevier Ltd;  
6 395 2020;395(10223):514–23. Available from: [http://dx.doi.org/10.1016-S0140-](http://dx.doi.org/10.1016/S0140-)  
7  
8 396 [6736\(20\)30154-9](http://dx.doi.org/10.1016/S0140-6736(20)30154-9)  
9  
10 397  
11  
12  
13  
14
- 15 398 4. Organization WH. [https://www.who.int/emergencies/diseases/novel-coronavirus-](https://www.who.int/emergencies/diseases/novel-coronavirus-2019/situation-reports)  
16  
17 399 [2019/situation-reports](https://www.who.int/emergencies/diseases/novel-coronavirus-2019/situation-reports) [Internet]. 2020 [cited 2020 Mar 29]. Available from:  
18  
19 <https://www.who.int/emergencies/diseases/novel-coronavirus-2019/situation-reports>  
20 400  
21  
22
- 23 401 5. Barreca AI, Shimshack JP. Absolute humidity, temperature, and influenza mortality: 30  
24 years of county-level evidence from the United States. *Amer J Epidemiol*. 2012;176(suppl.  
25 402 7):S114–22.  
26  
27 403  
28  
29
- 30 404 6. Lowen AC, Mubareka S, Steel J, Palese P. Influenza virus transmission is dependent on  
31 relative humidity and temperature. *PLoS Pathol*. 2007;3:e151.  
32 405  
33  
34
- 35 406 7. Bourouiba L. Turbulent Gas Clouds and Respiratory Pathogen Emissions Potential  
36 Implications for Reducing Transmission of COVID-19. *JAMA*. 2020;E1–2.  
37 407  
38  
39
- 40 408 8. Cai Y. The Effects of "Fangcang, Huoshenshan [Internet]. Available from:  
41 <https://www.medrxiv.org/content/10.1101/2020.02.26.20028472v3>  
42 409  
43  
44
- 45 410 9. Proverbio AM, Crotti N, Manfredi M, Zani A. Preliminary evidence that higher  
46 temperatures are associated with lower incidence of COVID-19, for cases reported  
47 411 globally up to 29th February 2020. *medRxiv*. 2020;(February).  
48  
49  
50 412  
51
- 52 10. <https://github.com/BlankerL/DXY-COVID-19-Data>.  
53 413  
54
- 55 11. <ftp://ftp.ncdc.noaa.gov/pub/data/noaa/2020/>. 2020.  
56 414  
57

1

2

3 415

4

5 416

6

7 417

8

9

10

11 418

12

13 419

14

15 420

16

17 421

18

19 422

20

21

22 423

23

24 424

25

26 425

27

28 426

29

30 427

31

32 428

33

34 429

35

36 430

37

38 431

39

40 432

41

42 433

43

44 434

45

46 435

47

48 436

49

50 437

51

52 438

53

54 439

55

56 440

57

58 441

59

60

12. Wang M, Jiang A, Gong L, Lu L, Guo W, Li C, et al. Temperature Significantly Change COVID-19 Transmission in 429 cities. Block Caving – A Viable Altern [Internet]. 2020; Available from: <https://www.medrxiv.org/content/10.1101/2020.02.22.20025791v1>
13. Luo W, Majumder MS, Liu D, Poirier C, Mandl KD, Lipsitch M, et al. The role of absolute humidity on transmission rates of the COVID-19 outbreak. medRxiv [Internet]. 2020;2020.02.12.20022467. Available from: <http://medrxiv.org/content/early/2020/02/17/2020.02.12.20022467.abstract%0Ahttps://www.medrxiv.org/content/10.1101/2020.02.12.20022467v1>
14. Bu J, Peng D-D, Xiao H, Yue Q, Han Y, Lin Y, et al. Analysis of meteorological conditions and prediction of epidemic trend of 2019-nCoV infection in 2020. medRxiv [Internet]. 2020;(May):2020.02.13.20022715. Available from: <https://www.medrxiv.org/content/10.1101/2020.02.13.20022715v1>
15. Peci A, Winter AL, Li Y, Gnaneshan S, Liu J, Mubareka S, et al. Effects of Absolute Humidity, Relative Humidity, Temperature, and Wind Speed on Influenza Activity in Toronto, Ontario, Canada. *Appl Env Microbiol*. 2019;85(6):e02426-18.
16. Kudo E, Song E, Yockey LJ, Rakib T, Wong PW, Homer RJ, et al. Low ambient humidity impairs barrier function and innate resistance against influenza infection. *Proc Natl Acad Sci U S A*. 2019;116(22):10905–10.
17. Oliveiros B, Caramelo L, Ferreira NC, Caramelo F. Role of temperature and humidity in the modulation of the doubling time of COVID-19 cases. medRxiv [Internet]. 2020; Available from: <https://www.medrxiv.org/content/10.1101/2020.03.05.20031872v1>

## FIGURE LEGENDS

**Fig. 1.** Loess regression interpolation of confirmed new case count to the four meteorological variables, (A) average temperature (T) in °C, (B) relative humidity (RH) in %, (C) wind speed (SPD) in meter per second (m/s), (D) visibility (VSB) in statute miles, for Wuhan city. Five time point's delay of confirmation from viral infection are displayed together in one figure, namely, exposure on the day, three days before, seven days before, 3~7 days before, and 14 days before.

**Fig. 2.** Scatterplots of confirmed new case counts to the four meteorological variables, (A) average temperature (T) in °C, (B) relative humidity (RH) in %, (C) wind speed (SPD) in meter per second (m/s), (D) visibility (VSB) in statute miles, for all the studied datasets. Quadric regression for T, RH, and SPD, and linear regression for VSB are illustrated for each dataset. Interpolation curves with 95% confidence intervals are shown in shadow. The discovery dataset includes the major outbreak Chinese cities, while the replication datasets included provincial data in Italy, and national data around the world(except China).

**Fig. 3.** The observed daily new case counts versus the predicted values by the short-term model (A-E) and the long-term model (F) are illustrated for all the studied areas. The plots exhibit five prediction-observation correlation patterns, which indicates five viral transmission modes: (A) the "restricted" pattern including the Chinese top affected cities excluding Wuhan; (B) the "controlled" pattern including early outbreak areas, namely, Iran, Italy, Japan, and Korea, and Chinese Wuhan city; (C) the "natural" pattern including late outbreak European and American countries, namely, France, Germany, Spain, United Kingdom, and United States; (D) the "tropical" pattern including tropical countries India, Singapore, and Thailand; (E) the "southern" pattern including countries in the southern hemisphere, Australia and South Africa. Each dot

1  
2  
3  
4  
5  
6  
7  
8  
9  
10  
11  
12  
13  
14  
15  
16  
17  
18  
19  
20  
21  
22  
23  
24  
25  
26  
27  
28  
29  
30  
31  
32  
33  
34  
35  
36  
37  
38  
39  
40  
41  
42  
43  
44  
45  
46  
47  
48  
49  
50  
51  
52  
53  
54  
55  
56  
57  
58  
59  
60

458 represents one day. Loess regression (A, B, E) and linear regression (C, D) interpolation curves  
459 are illustrated for each dataset, with 95% confidence intervals showing in shadow. The black  
460 solid line represents that the observed values are equal to the predicted ones, and dots closer to  
461 this line means better prediction performance.

For peer review only

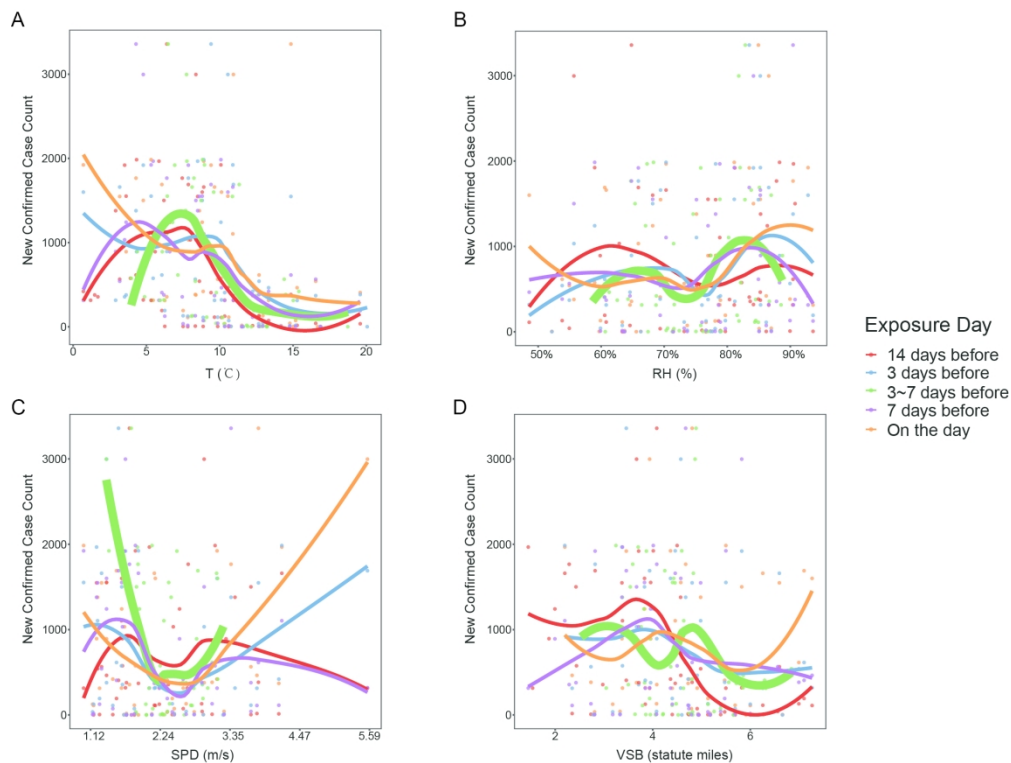

Fig. 1. Loess regression interpolation of confirmed new case count to the four meteorological variables, (A) average temperature (T) in °C, (B) relative humidity (RH) in %, (C) wind speed (SPD) in meter per second (m/s), (D) visibility (VSB) in statute miles, for Wuhan city. Five time point's delay of confirmation from viral infection are displayed together in one figure, namely, exposure on the day, three days before, seven days before, 3~7 days before, and 14 days before.

207x156mm (300 x 300 DPI)



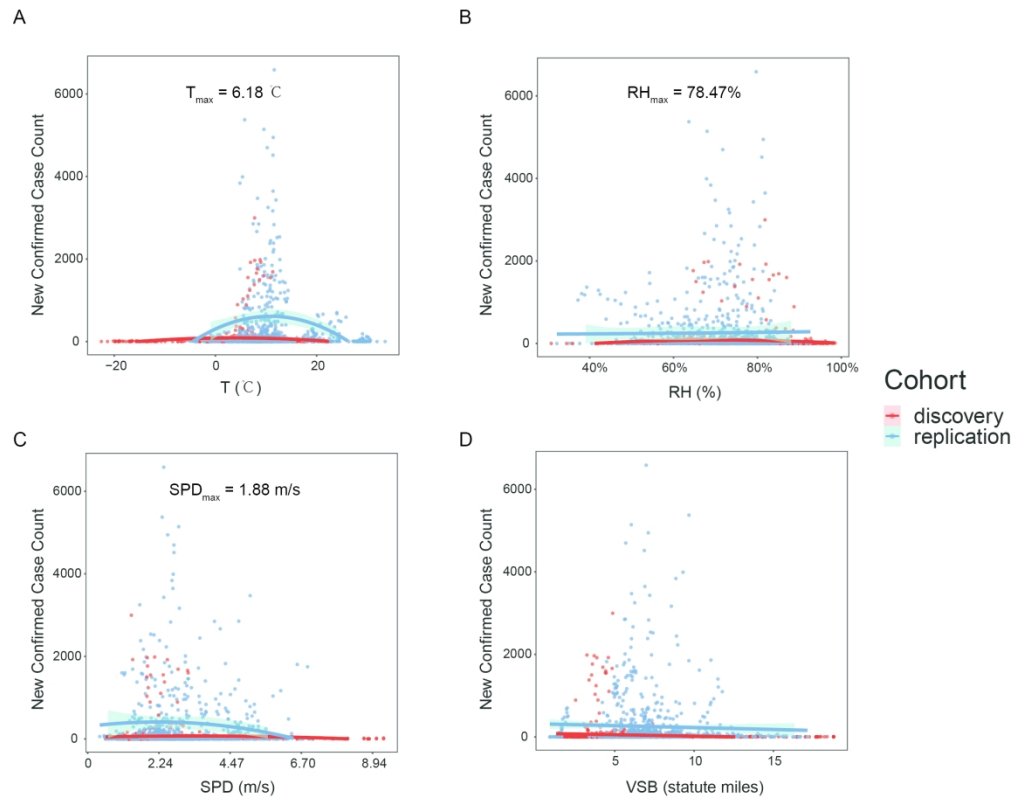

32  
33  
34  
35  
36  
37

Fig. 2. Scatterplots of confirmed new case counts to the four meteorological variables, (A) average temperature (T) in °C, (B) relative humidity (RH) in %, (C) wind speed (SPD) in meter per second (m/s), (D) visibility (VSB) in statute miles, for all the studied datasets. Quadric regression for T, RH, and SPD, and linear regression for VSB are illustrated for each dataset. Interpolation curves with 95% confidence intervals are shown in shadow. The discovery dataset includes the major outbreak Chinese cities, while the replication datasets included provincial data in Italy, and national data around the world(except China).

38  
39  
40  
41  
42  
43  
44  
45  
46  
47  
48  
49  
50  
51  
52  
53  
54  
55  
56  
57  
58  
59

218x172mm (300 x 300 DPI)

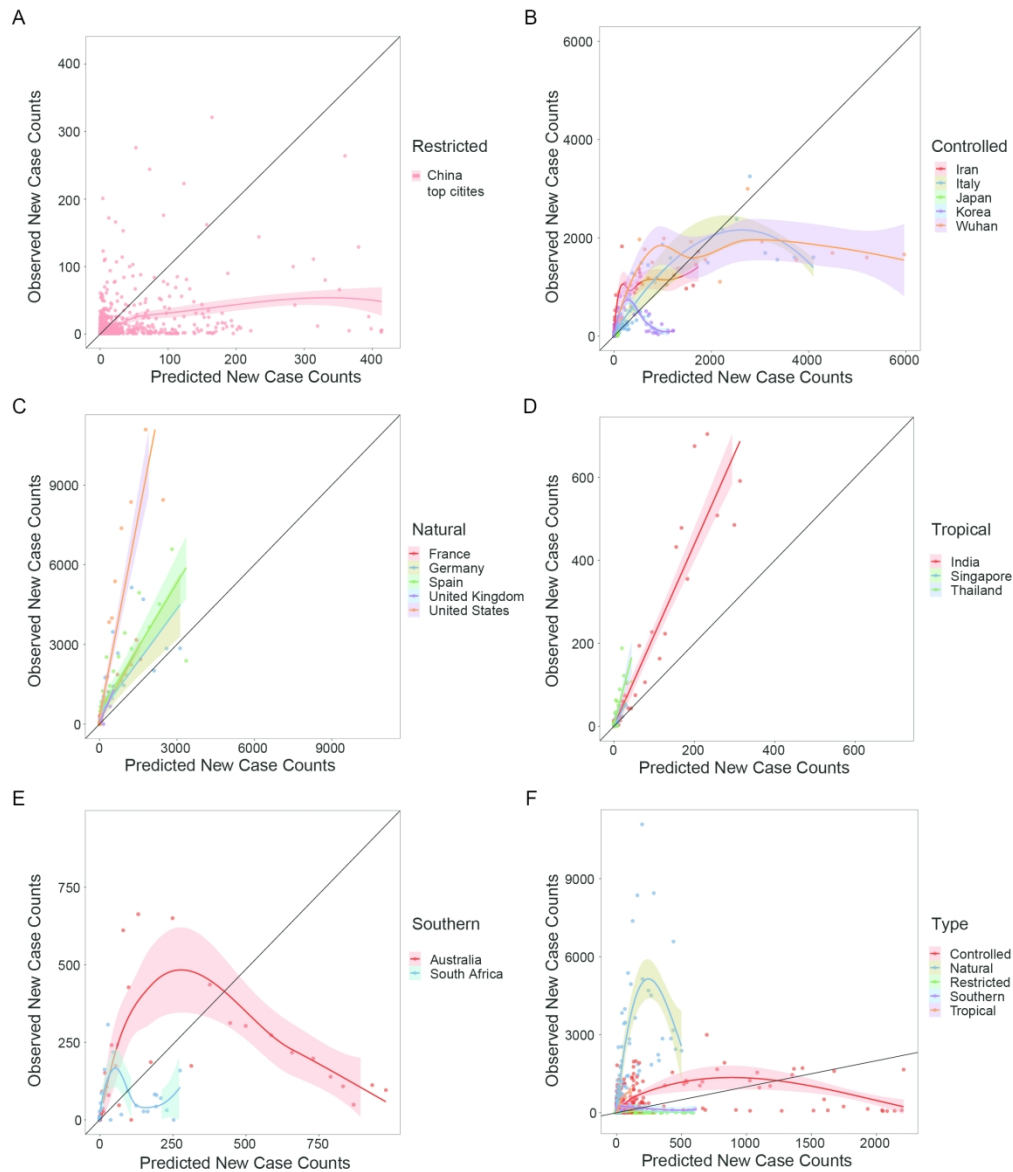

Fig. 3. The observed daily new case counts versus the predicted values by the short-term model (A-E) and the long-term model (F) are illustrated for all the studied areas. The plots exhibit five prediction-observation correlation patterns, which indicates five viral transmission modes: (A) the "restricted" pattern including the Chinese top affected cities excluding Wuhan; (B) the "controlled" pattern including early outbreak areas, namely, Iran, Italy, Japan, and Korea, and Chinese Wuhan city; (C) the "natural" pattern including late outbreak European and American countries, namely, France, Germany, Spain, United Kingdom, and United States; (D) the "tropical" pattern including tropical countries India, Singapore, and Thailand; (E) the "southern" pattern including countries in the southern hemisphere, Australia and South Africa. Each dot represents one day. Loess regression (A, B, E) and linear regression (C, D) interpolation curves are illustrated for each dataset, with 95% confidence intervals showing in shadow. The black solid line represents that the observed values are equal to the predicted ones, and dots closer to this line means better prediction performance.

209x244mm (300 x 300 DPI)

## 1 **Supplementary Materials and Methods**

### 2 Epidemiological data

3 We scrutinized WHO's situation reports to rule out these countries with only  
4 imported cases, and only collected the confirmed cases with possible or confirmed  
5 local transmission (i.e., without recent travel history to China).

6 For Wuhan city, there was a shortage of test kits at the beginning of the pandemic,  
7 which would make confirmed case counts much lower than the actual data, thus, we  
8 discarded epidemic data before January 28th, the day when domestic test kits have  
9 been approved, produced in large quantities, and were available for Wuhan hospitals.  
10 As there was a cut down problem for the existing confirmed case count on February  
11 20th for Wuhan, when modeling with the existing confirmed case count, only data  
12 before February 20th were used.

### 13 Weather data

14 Temperature and dew point displayed in Fahrenheit were transformed into  
15 Celsius forms, and relative humidity was calculated from temperature and dew point  
16 using the following formula for each time point:

$$RH = \begin{cases} e^{\frac{7.5D}{237.3+D} - \frac{7.5T}{237.3+T}} \times 100\%, & T < 0 \\ 10^{\frac{7.5D}{237.3+D} - \frac{7.5T}{237.3+T}} \times 100\%, & T \geq 0 \end{cases}$$

17 where RH is the relative humidity, D is the dew point in degrees Celsius, T is the  
18 temperature in degrees Celsius, and  $e$  is the base of the natural log.

19 For each city with epidemiological data, the meteorological station in that city or  
20 that was closest to the latitude and longitude coordinates of the city center was chosen.

1  
2  
3  
4 21 For a city with more than one meteorological stations, the one nearest to the city  
5  
6 22 center was chosen. For a province with epidemiological data, the meteorological  
7  
8  
9 23 station in the capital city of that province was chosen. For a country with only  
10  
11  
12 24 national wide epidemiological data, weather data were averaged across all the  
13  
14  
15 25 meteorological observatories in the cities where outbreak was officially reported.  
16  
17 26 Latitude and elevation for the meteorological observatories were also collected.

### 18 19 27 Statistical modeling

20  
21  
22 28 Only one city Wuhan was chosen for illustrating the time delay effect because it  
23  
24 29 is the first city to have an outbreak of COVID-19, there was none reported imported  
25  
26  
27 30 cases for Wuhan, which might obscure the correlation between weather and virus  
28  
29  
30 31 transmission.

### 31 32 32 **Supplementary Results**

#### 33 33 Datasets description

34  
35 34 Only Chinese cities with monthly confirmed cases over 50 were included in the  
36  
37 35 discovery dataset, which was 60 cities including Wuhan. The confirmed new cases in  
38  
39  
40 36 Wuhan on February 13, 2020, reached 13,436, which was oddly high as the daily  
41  
42  
43 37 confirmed new cases were no larger than 3,000 on all the other dates in Wuhan or in  
44  
45  
46 38 all the other Chinese cities. We suppose that it might be due to abrupt large  
47  
48  
49 39 supplement of virus test kits or data correction on that day. In order to reduce the  
50  
51  
52 40 potential contamination of modeling by this outlier, data on that day were discarded  
53  
54  
55 41 from the subsequent analysis. There were also two oddly large new confirmed case  
56  
57  
58 42 counts for Lombardy, which were discarded from the subsequent analysis. Except the  
59  
60

1  
2  
3  
4 43 outliers, the daily confirmed new cases in the discovery dataset ranged from 1 to  
5  
6 44 2,997, the average temperature ranged  $-22.54^{\circ}\text{C} \sim 22.16^{\circ}\text{C}$ , the wind speed ranged  
7  
8  
9 45  $0.56 \sim 9.29$  meter per second, visibility ranged  $1.3 \sim 18.8$  statute miles, and relative  
10  
11  
12 46 humidity ranged  $30.84\% \sim 98.52\%$ .

#### 13 14 47 Model selection

15  
16  
17 48 With the increase of relative humidity, the amount of droplets in the air increases,  
18  
19 49 leading to more virus load. However, as the air gets humid, human's respiratory tract  
20  
21  
22 50 could better defend virus infection. Thus, the relationship of relative humidity could  
23  
24  
25 51 be complex, not pure linear. Giving comprehensive consideration, we defined the  
26  
27 52 effect of relative humidity to be quadric. As for visibility, it only affects the amount of  
28  
29  
30 53 particles in the air, which is positively correlated with virus load. Thus, it is most  
31  
32  
33 54 probably to exert its effect linearly.

34  
35 55 Although relative humidity and visibility 7 days ago correlated with the  
36  
37 56 confirmed new case counts best, there was not great loss of model fitting statistics for  
38  
39  
40 57 relative humidity and visibility 3~7 days ago, as compared to the loss between 7 days  
41  
42  
43 58 time delay and 3~7 days time delay for temperature.

#### 44 45 59 Fitted models

46  
47  
48 60 The fitted single-factor models were as follows:

$$49 \quad \text{New Case Count} = -0.11305 \times T^2 + 1.39819 \times T + 45.11405$$

50  
51  
52 61 where T is temperature in  $^{\circ}\text{C}$ .

53  
54  
55 62 The estimate p-value for constant was  $< 0.001$ . The extremum was  $-1.39819/$   
56  
57  
58 63  $(2 \times (-0.11305)) = 6.183945 \text{ }^{\circ}\text{C}$ .

$$\text{New Case Count} = -0.05759 \times \text{RH}^2 + 9.038 \times \text{RH} - 303.0$$

64 where RH is relative humidity in percentage.

65 The extremum was  $-9.038/(2 \times (-0.05759)) = 78.46848 \%$ .

$$\text{New Case Count} = -1.360056 \times \text{SPD}^2 + 5.120123 \times \text{SPD} + 42.1855$$

66 where SPD is wind speed in meter per second (m/s).

67 The extremum was  $-5.120123/(2 \times (-1.360056)) = 1.882321 \text{ m/s}$ .

$$\text{New Case Count} = -7.021 \times \text{VSB} + 89.041$$

68 where VSB is visibility in statute miles.

69 The estimate p-value for VSB was  $< 0.01$ , constant was  $< 0.001$ .

70 Thus, the complex short-term model to be regressed was

New Case Count

$$\begin{aligned} &= (-0.11 \times T^2 + 1.40 \times T - 0.058 \times \text{RH}^2 + 9.04 \times \text{RH} - 1.36 \\ &\times \text{SPD}^2 + 5.12 \times \text{SPD} - 7.02 \times \text{VSB} - 126.66) \times a \\ &\times \text{Existing Confirmed Case Count} \end{aligned}$$

71 where a is a constant to be fitted. All parameters take values 3~7 days before the day

72 new case count is confirmed.

73 Through fitting this full model with the discovery data, a was estimated to be  
74 0.0004786 (standard error 0.0000128, p-values  $< 2e-16$ ).

75 For long-term model, the fitted model with temperature 14 days ago was as  
76 follows:

$$\text{New Case Count} = -0.10062 \times T^2 + 1.11189 \times T + 46.41792$$

77 The estimate p-value for constant was  $< 0.001$ . The extremum was  $-1.11189/$   
78  $(2 \times (-0.10062)) = 5.525194$ .

79 Thus, the simplified long-term model to be regressed was:

$$\begin{aligned} \text{New Case Count} \\ &= (-0.10 \times T^2 + 1.11 \times T + 46.42) \times b \\ &\times \text{Existing Confirmed Case Count} \end{aligned}$$

80 where b is a constant to be fitted. All parameters take values 14 days before the day  
81 new case count is confirmed.

82 Through fitting this simplified model with the discovery data, b was estimated to  
83 be 0.0061382 (standard error 0.0002666,  $p$ -values  $< 2e-16$ ).

84 Table S1. Model fitness statistics for comparing and selecting proper fitting

85 relationship

|                          | <b>sigma</b> | <b>finTol</b>        | <b>logLik</b> | <b>AIC</b> | <b>BIC</b> | <b>deviance</b> | <b>Corr</b> |
|--------------------------|--------------|----------------------|---------------|------------|------------|-----------------|-------------|
| <b>Temperature</b>       |              |                      |               |            |            |                 |             |
| <b>Linear</b>            | 493          | $4.5 \times 10^{-8}$ | -167          | 339        | 342        | 4860391         | 0.757       |
| <b>Quadric</b>           | 421          | $1.3 \times 10^{-7}$ | -163          | 333        | 337        | 3370230         | 0.812       |
| <b>Relative humidity</b> |              |                      |               |            |            |                 |             |
| <b>Linear</b>            | 627          | $9.8 \times 10^{-8}$ | -172          | 350        | 353        | 7855418         | 0.401       |
| <b>Quadric</b>           | 626          | $8.4 \times 10^{-6}$ | -171          | 351        | 355        | 7442367         | 0.358       |
| <b>Wind speed</b>        |              |                      |               |            |            |                 |             |
| <b>Linear</b>            | 585          | $3.1 \times 10^{-8}$ | -170          | 347        | 350        | 6840545         | 0.380       |
| <b>Quadric</b>           | 546          | $2.4 \times 10^{-7}$ | -168          | 344        | 349        | 5654728         | 0.423       |
| <b>Visibility</b>        |              |                      |               |            |            |                 |             |
| <b>Linear</b>            | 594          | $3.3 \times 10^{-8}$ | -171          | 347        | 351        | 7059799         | 0.354       |
| <b>Quadric</b>           | 598          | $7.9 \times 10^{-7}$ | -170          | 349        | 353        | 6799355         | 0.358       |

86 Note: sigma, estimated standard error of the residuals; finTol, the achieved convergence tolerance; logLik, the

87 log-likelihood of the model; AIC, Akaike's Information Criterion for the model; BIC, Bayesian Information

88 Criterion for the model; deviance, deviance of the model; Corr, Spearman's correlation coefficient between the real

89 values and the predicted values by the predisposed model.

90



91 Table S2. Model fitness statistics for comparing and selecting proper time delay of

92 virus exposure

|                          | <b>sigma</b> | <b>finTol</b>        | <b>logLik</b> | <b>AIC</b> | <b>BIC</b> | <b>deviance</b> | <b>Corr</b> |
|--------------------------|--------------|----------------------|---------------|------------|------------|-----------------|-------------|
| <b>Temperature</b>       |              |                      |               |            |            |                 |             |
| <b>Day 0</b>             | 626          | $2.6 \times 10^{-8}$ | -171          | 351        | 355        | 7441513         | 0.330       |
| <b>Day -3</b>            | 605          | $1.3 \times 10^{-8}$ | -171          | 349        | 353        | 6953553         | 0.479       |
| <b>Day -7</b>            | 664          | $5.4 \times 10^{-8}$ | -173          | 353        | 358        | 8386957         | 0.262       |
| <b>Day -14</b>           | 528          | $1.1 \times 10^{-7}$ | -168          | 343        | 347        | 5297229         | 0.534       |
| <b>Day -3 ~ -7</b>       | 421          | $1.3 \times 10^{-7}$ | -163          | 333        | 337        | 3370230         | 0.812       |
| <b>Relative humidity</b> |              |                      |               |            |            |                 |             |
| <b>Day 0</b>             | 605          | $5.9 \times 10^{-6}$ | -171          | 349        | 353        | 6953396         | 0.389       |
| <b>Day -3</b>            | 679          | $4.3 \times 10^{-6}$ | -173          | 354        | 359        | 8768069         | 0.065       |
| <b>Day -7</b>            | 560          | $5.0 \times 10^{-8}$ | -169          | 346        | 350        | 5962416         | 0.524       |
| <b>Day -14</b>           | 605          | $9.1 \times 10^{-6}$ | -171          | 349        | 353        | 6962609         | 0.326       |
| <b>Day -3 ~ -7</b>       | 626          | $8.4 \times 10^{-6}$ | -171          | 351        | 355        | 7442367         | 0.358       |
| <b>Wind speed</b>        |              |                      |               |            |            |                 |             |
| <b>Day 0</b>             | 526          | $7.4 \times 10^{-8}$ | -167          | 343        | 347        | 5251026         | 0.500       |
| <b>Day -3</b>            | 663          | $1.4 \times 10^{-8}$ | -173          | 353        | 357        | 8343427         | 0.268       |
| <b>Day -7</b>            | 559          | $1.1 \times 10^{-8}$ | -169          | 346        | 350        | 5926891         | 0.516       |
| <b>Day -14</b>           | 674          | $5.2 \times 10^{-8}$ | -173          | 354        | 358.       | 8643076         | 0.014       |
| <b>Day -3 ~ -7</b>       | 546          | $2.4 \times 10^{-7}$ | -168          | 344        | 349        | 5654728         | 0.423       |
| <b>Visibility</b>        |              |                      |               |            |            |                 |             |

|                    |     |                      |      |     |     |         |       |
|--------------------|-----|----------------------|------|-----|-----|---------|-------|
| <b>Day 0</b>       | 646 | $4.2 \times 10^{-9}$ | -173 | 351 | 354 | 8343221 | 0.286 |
| <b>Day -3</b>      | 663 | $5.1 \times 10^{-8}$ | -173 | 352 | 355 | 8804055 | 0.016 |
| <b>Day -7</b>      | 514 | $3.9 \times 10^{-8}$ | -168 | 341 | 344 | 5290247 | 0.502 |
| <b>Day -14</b>     | 635 | $1.1 \times 10^{-8}$ | -172 | 350 | 354 | 8052388 | 0.272 |
| <b>Day -3 ~ -7</b> | 594 | $3.3 \times 10^{-8}$ | -171 | 347 | 351 | 7059799 | 0.354 |

93 Note: sigma, estimated standard error of the residuals; finTol, the achieved convergence tolerance; logLik, the  
 94 log-likelihood of the model; AIC, Akaike's Information Criterion for the model; BIC, Bayesian Information  
 95 Criterion for the model; deviance, deviance of the model; Corr, Spearman's correlation coefficient between the real  
 96 values and the predicted values by the predisposed model.  
 97

98 Table S3. Model fitness statistics for weather-combined model and epidemic only

99 model

| Model                   | sigma | finTol               | logLik | AIC   | BIC   | deviance | Corr  |
|-------------------------|-------|----------------------|--------|-------|-------|----------|-------|
| <b>Weather-combined</b> | 147   | $1.8 \times 10^{-9}$ | -6239  | 12481 | 12491 | 21128810 | 0.171 |
| <b>Epidemic-only</b>    | 149   | $2.1 \times 10^{-8}$ | -6251  | 12507 | 12517 | 21689551 | 0.152 |

100 Note: The weather-combined model is the short-term model with multiplicative constant to be fitted. The  
 101 epidemic-only model is the model only with existing confirmed case count as an independent variable, assuming a  
 102 linear function.

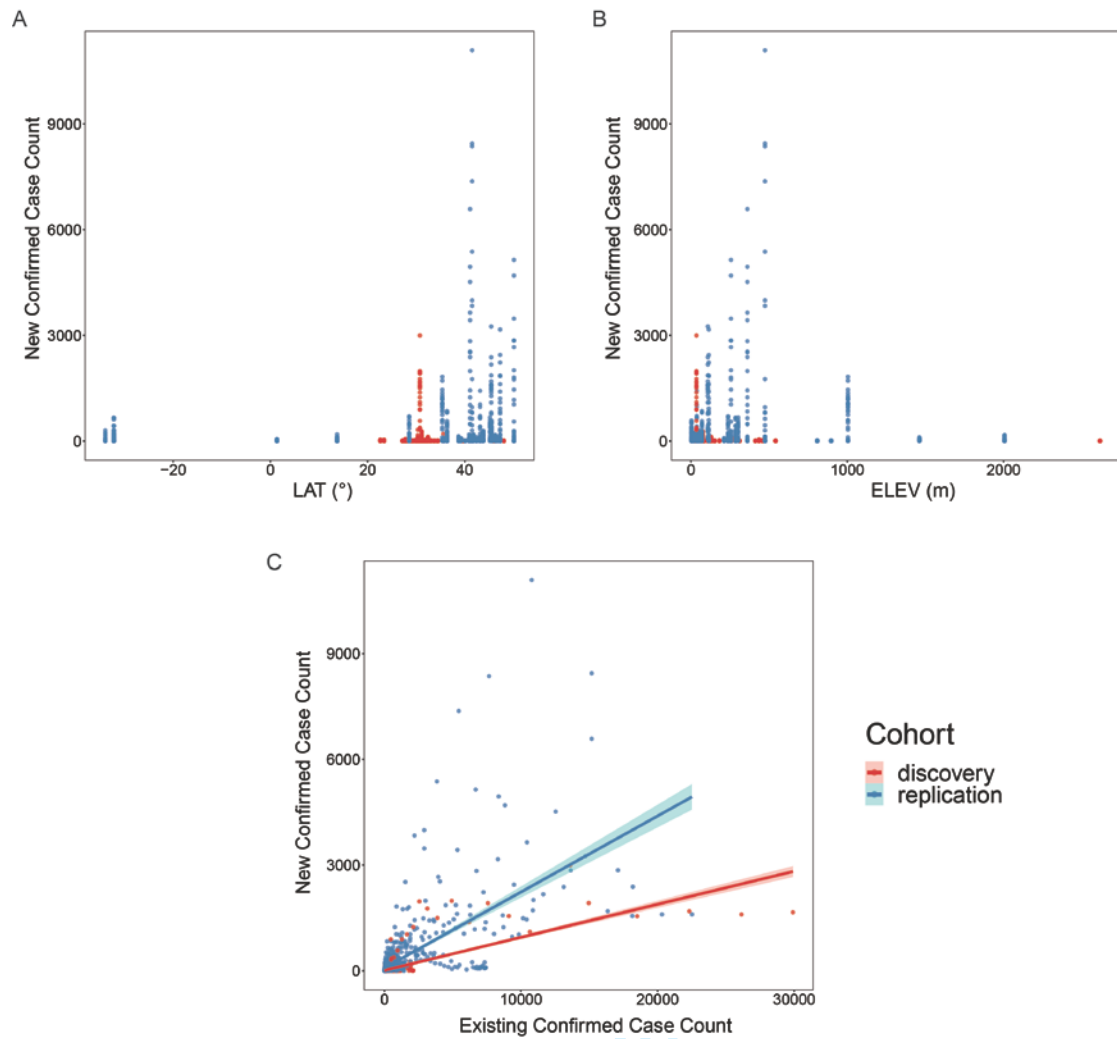

103

104 **Fig. S1.** Scatterplots of new confirmed case count to (A) latitude, (B) elevation, and  
105 (C) the existing confirmed case count, for all the studied sites. Linear regression (C)  
106 interpolation curves are illustrated for each dataset, with 95% confidence intervals  
107 showing in shadow.

# BMJ Open

## Predicting the local COVID-19 outbreak around the world with meteorological conditions: a model-based qualitative study

|                                 |                                                                                                                                                                                                                                                                                                                                                                                                                                                                                                                                                                                                                                                                                                                                                                                                                                                                                                                                                                             |
|---------------------------------|-----------------------------------------------------------------------------------------------------------------------------------------------------------------------------------------------------------------------------------------------------------------------------------------------------------------------------------------------------------------------------------------------------------------------------------------------------------------------------------------------------------------------------------------------------------------------------------------------------------------------------------------------------------------------------------------------------------------------------------------------------------------------------------------------------------------------------------------------------------------------------------------------------------------------------------------------------------------------------|
| Journal:                        | <i>BMJ Open</i>                                                                                                                                                                                                                                                                                                                                                                                                                                                                                                                                                                                                                                                                                                                                                                                                                                                                                                                                                             |
| Manuscript ID                   | bmjopen-2020-041397.R2                                                                                                                                                                                                                                                                                                                                                                                                                                                                                                                                                                                                                                                                                                                                                                                                                                                                                                                                                      |
| Article Type:                   | Original research                                                                                                                                                                                                                                                                                                                                                                                                                                                                                                                                                                                                                                                                                                                                                                                                                                                                                                                                                           |
| Date Submitted by the Author:   | 22-Sep-2020                                                                                                                                                                                                                                                                                                                                                                                                                                                                                                                                                                                                                                                                                                                                                                                                                                                                                                                                                                 |
| Complete List of Authors:       | Chen, Biqing; Affiliated Hospital of Nanjing University of Chinese Medicine, Research Center of Chinese Medicine<br>Liang, Hao ; Affiliated Hospital of Nanjing University of Chinese Medicine, Department of Hematology<br>Yuan, Xiaomin ; Affiliated Hospital of Nanjing University of Chinese Medicine, Department of Colorectal Surgery<br>Hu, Yingying ; Affiliated Hospital of Nanjing University of Chinese Medicine, Department of Hematology<br>Xu, Miao; Affiliated Hospital of Nanjing University of Chinese Medicine, Department of Hematology<br>Zhao, Yating ; Nanjing University<br>Zhang, Binfen ; Affiliated Hospital of Nanjing University of Chinese Medicine, Department of Hematology<br>Tian, Fang ; Affiliated Hospital of Nanjing University of Chinese Medicine, Research Center of Chinese Medicine<br>Zhu, Xuejun ; Affiliated Hospital of Nanjing University of Chinese Medicine, Department of Hematology, Research Center of Chinese Medicine |
| <b>Primary Subject Heading</b>: | Epidemiology                                                                                                                                                                                                                                                                                                                                                                                                                                                                                                                                                                                                                                                                                                                                                                                                                                                                                                                                                                |
| Secondary Subject Heading:      | Global health, Infectious diseases, Occupational and environmental medicine, Public health, Qualitative research                                                                                                                                                                                                                                                                                                                                                                                                                                                                                                                                                                                                                                                                                                                                                                                                                                                            |
| Keywords:                       | Epidemiology < INFECTIOUS DISEASES, EPIDEMIOLOGY, Public health < INFECTIOUS DISEASES, Infection control < INFECTIOUS DISEASES, COVID-19                                                                                                                                                                                                                                                                                                                                                                                                                                                                                                                                                                                                                                                                                                                                                                                                                                    |
|                                 |                                                                                                                                                                                                                                                                                                                                                                                                                                                                                                                                                                                                                                                                                                                                                                                                                                                                                                                                                                             |

SCHOLARONE™  
Manuscripts



I, the Submitting Author has the right to grant and does grant on behalf of all authors of the Work (as defined in the below author licence), an exclusive licence and/or a non-exclusive licence for contributions from authors who are: i) UK Crown employees; ii) where BMJ has agreed a CC-BY licence shall apply, and/or iii) in accordance with the terms applicable for US Federal Government officers or employees acting as part of their official duties; on a worldwide, perpetual, irrevocable, royalty-free basis to BMJ Publishing Group Ltd ("BMJ") its licensees and where the relevant Journal is co-owned by BMJ to the co-owners of the Journal, to publish the Work in this journal and any other BMJ products and to exploit all rights, as set out in our [licence](#).

The Submitting Author accepts and understands that any supply made under these terms is made by BMJ to the Submitting Author unless you are acting as an employee on behalf of your employer or a postgraduate student of an affiliated institution which is paying any applicable article publishing charge ("APC") for Open Access articles. Where the Submitting Author wishes to make the Work available on an Open Access basis (and intends to pay the relevant APC), the terms of reuse of such Open Access shall be governed by a Creative Commons licence – details of these licences and which [Creative Commons](#) licence will apply to this Work are set out in our licence referred to above.

Other than as permitted in any relevant BMJ Author's Self Archiving Policies, I confirm this Work has not been accepted for publication elsewhere, is not being considered for publication elsewhere and does not duplicate material already published. I confirm all authors consent to publication of this Work and authorise the granting of this licence.

1  
2  
3  
4 1 **Title: Predicting the local COVID-19 outbreak around the world with**  
5  
6 2 **meteorological conditions: a model-based qualitative study**  
7  
8

9 3 **Authors:** Biqing Chen<sup>1</sup>, Hao Liang<sup>2</sup>, Xiaomin Yuan<sup>3</sup>, Yingying Hu<sup>2</sup>, Miao Xu<sup>2</sup>, Yating Zhao<sup>4</sup>,  
10 4 Binfen Zhang<sup>2</sup>, Fang Tian<sup>1</sup>, Xuejun Zhu<sup>1,2\*</sup>  
11  
12  
13

14  
15 5 **Affiliations:**  
16  
17

18 6 <sup>1</sup> Research Center of Chinese Medicine, Jiangsu Province Hospital of Chinese Medicine, the  
19 7 Affiliated Hospital of Nanjing University of Chinese Medicine, Nanjing, China.  
20  
21

22 8 <sup>2</sup> Department of Hematology, Jiangsu Province Hospital of Chinese Medicine, the Affiliated  
23 9 Hospital of Nanjing University of Chinese Medicine, Nanjing, China.  
24  
25

26 10 <sup>3</sup> Department of Colorectal Surgery, Jiangsu Province Hospital of Chinese Medicine, the  
27 11 Affiliated Hospital of Nanjing University of Chinese Medicine, Nanjing, China.  
28  
29

30 12 <sup>4</sup> School of Atmospheric Sciences, Nanjing University, Nanjing, China  
31  
32

33 13 \*Correspondence to: Xuejun Zhu, zhuxuejun@njucm.edu.cn.  
34  
35

36 14  
37 15 **Abstract**  
38  
39

40 16 **OBJECTIVES:** This study aims to investigate the relationship between daily weather and  
41 17 transmission rate of SARS-CoV-2, and to develop a generalized model for future prediction of  
42 18 the COVID-19 spreading rate for a certain area with meteorological factors.  
43  
44

45 19 **DESIGN:** A retrospective, qualitative study.  
46  
47

48 20 **METHODS AND ANALYSIS:** We collected 382,596 records of weather data with four  
49 21 meteorological factors, i.e., average temperature, relative humidity, wind speed, and visibility,  
50  
51  
52

1  
2  
3 22 and 15,192 records of epidemic data with daily new confirmed case counts (1,587,209 confirmed  
4  
5 23 cases in total) in nearly 500 areas worldwide from January 20 to April 9. Epidemic data were  
6  
7  
8 24 modeled against weather data to find a model that could best predict the future outbreak.  
9

10  
11 25 **RESULTS:** Significant correlations of the daily new confirmed case counts with the weather 3~7  
12  
13 26 days ago were found. SARS-CoV-2 is easy to spread under weather conditions of average  
14  
15 27 temperature at 5~15 °C, relative humidity at 70%~80%, wind speed at 1.5~4.5 meter / second,  
16  
17  
18 28 and visibility less than 10 statute miles. A short-term model with these meteorological variables  
19  
20 29 in the past 3~7 days was derived to predict the daily increase in COVID-19; and a long-term  
21  
22 30 model using temperature to predict the pandemic in the next week or month was derived. Taken  
23  
24  
25 31 China as a discovery dataset, it was well validated with worldwide data. According to this model,  
26  
27 32 there are five different viral transmission pattern, "restricted", "controlled", "natural", "tropical",  
28  
29 33 "southern". This model's prediction performance correlates with the actual observations best  
30  
31  
32 34 (over 0.9 correlation coefficient) under natural spread mode of SARS-CoV-2 when there is not  
33  
34 35 much human interference by epidemic prevention measures.  
35

36  
37 36 **CONCLUSIONS:** This model can be used for prediction of the future outbreak, and illustrating  
38  
39 37 the effect of epidemic control for a certain area.  
40

41  
42 38 **Keywords:** COVID-19, SARS-CoV-2, weather, temperature, prediction model, epidemic control  
43  
44  
45 39  
46

#### 47 40 **Strengths and limitations of this study**

- 48  
49  
50 41 ● This study investigates the role of daily weather in COVID-19 spread systematically with a  
51  
52 42 comprehensive set of four meteorological factors.  
53  
54  
55  
56  
57  
58  
59  
60



- 1  
2  
3 43 ● This research collected a huge amount of data, covering nearly 500 areas worldwide in a long  
4  
5 44 timescale.  
6  
7  
8 45 ● The current study proposes mathematical models integrating meteorological information for  
9  
10 46 predicting COVID-19 case counts in the future.  
11  
12  
13 47 ● The influence of weather on virus spread could be confounded by a dozen of manual  
14  
15 48 interventions, such as population mobility and disinfection measures, leading to inaccurate  
16  
17 modeling.  
18 49  
19  
20  
21 50 ● The prediction model (especially the long-term model) might be unsuitable and inaccurate  
22  
23 51 for areas with hot weather.  
24  
25  
26  
27  
28  
29  
30  
31  
32  
33  
34  
35  
36  
37  
38  
39  
40  
41  
42  
43  
44  
45  
46  
47  
48  
49  
50  
51

## Introduction

The COVID-19 pandemic caused by SARS-CoV-2 has spread all over the world and has great social and economic impact worldwide (1,2). It exhibits high human-to-human transmissibility compared to other coronavirus like SARS (3). As of April 28 in 2020, the reported cumulative confirmed case count reached over three million and reported death is over 0.21 million globally (4). It would be crucial to predict the future trend of COVID-19 outbreak ahead, in order to make proper prevention and control strategies accordingly in time.

Besides population mobility and human-to-human contact, meteorological conditions have been suggested to be involved in the transmission of droplet-mediated viral diseases (5,6). As droplets carrying the coronavirus can travel in gaseous clouds as far as eight metres and stay suspended in the air for hours (7), the suspending time and viability of the coronavirus outside body would be largely affected by the environment. Wind speed could affect the suspending time of droplets, while visibility and humidity reflect the amount of particles in the air, determining the coronavirus payload. Temperature affects virus's viability in the environment. As SARS-CoV-2 is enveloped, it might be more vulnerable to adverse conditions like high temperature.

The impact of weather on epidemiology has been mentioned in human's history. The ancient Chinese had a theory called "Five Movement and Six Weather" to study climate change and its relationship with human health. Currently, there are a few studies on preprint servers discussing the relationship of temperature and humidity with the pandemic, but none is systematical investigation or proposes validated practical model for prediction (8-13).

Herein, this study intends to investigate the relationship between meteorological factors and epidemic transmission rate on a world scale. Four meteorological variables, i.e., average temperature, relative humidity, wind speed, and visibility, were collected as well as the confirmed

1  
2  
3 75 case counts daily for 80 days from January 20, 2020 to April 9, 2020 for nearly 500 areas around  
4  
5 76 the world, including 428 Chinese cities and areas, 18 Italian provinces, and 13 other countries.  
6  
7  
8 77 Five time point's delay of virus infection from the exposure day were considered and compared to  
9  
10 78 determine the most reasonable time point's delay. A multivariate polynomial regression model  
11  
12 79 with meteorological factors as a "weather coefficient" of the existing confirmed case count was  
13  
14  
15 80 established in a discovery Chinese dataset, and then validated by worldwide data. Five  
16  
17 81 transmission modes, indicating different levels of epidemic control, were revealed by this model.  
18  
19 82 In this view, this model can not only predict future outbreak, but also be used to evaluate the  
20  
21  
22 83 effect of epidemic prevention measures for a certain area.  
23

## 24 84 **Materials and Methods**

### 27 85 Epidemiological data

30 86 Epidemiological data were collected from the World Health Organization (WHO) (4),  
31  
32 87 European Centre for Disease Control and Prevention, and DXY-COVID-19-Data (10). The daily  
33  
34 88 new confirmed case counts were collected from January 20, 2020 to April 9, 2020. Incidence data  
35  
36  
37 89 were obtained for 428 Chinese cities and districts, 18 Italian provinces, and 13 other countries,  
38  
39 90 namely, United States, United Kingdom, Germany, France, Italy, Spain, Iran, Korea, Japan,  
40  
41 91 Australia, South Africa, India, Thailand, and Singapore. Considering the potential confounding  
42  
43  
44 92 effect, only Chinese cities with no less than 50 cumulative confirmed cases in one month and  
45  
46 93 without official reports of large imported cases (42 in total) were taken as a discovery dataset,  
47  
48 94 while those for Italian provinces and all the other nations were taken as replication datasets  
49  
50  
51 95 (Supplementary Materials).

### 53 96 Weather data

1  
2  
3 97 Four meteorological variables were chosen, air temperature, relative humidity, wind speed,  
4  
5 98 and visibility. Temperature could affect virus viability in the environment. Wind speed could  
6  
7 affect the suspending time of virus-attached particles. Relative humidity reflects the amount of  
8 99 droplets in the air. Visibility is influenced by the amount of particles such as dust and air  
9  
10 100 pollutants. These two parameters both affect the amount of mediator for the virus to stay in the  
11  
12 101 air. Therefore, temperature, dew point, wind speed, and visibility were collected, and relative  
13  
14 102 humidity was calculated accordingly (Supplementary Materials). We obtained hourly values of  
15  
16 103 meteorological observations and geographic factors (latitude and elevation) from the Integrated  
17  
18 104 Surface Database of USA National Centers for Environmental Information (11). Daily data were  
19  
20 105 calculated by averaging the hourly data for each variable in each day.  
21  
22  
23  
24 106  
25  
26

### 27 107 Statistical modeling

28  
29 108 The number of daily new confirmed cases was taken as a dependent variable. Four  
30  
31 109 meteorological variables, namely, average temperature, wind speed, visibility, and relative  
32  
33 110 humidity, and the existing confirmed case counts were taken as independent variables.  
34  
35 111 Considering that there is a latency stage from the day one get infected to the day being  
36  
37 112 confirmed, a time delay of the day COVID-19 was confirmed from the day weather data were  
38  
39 113 collected needs to be taken into consideration. As it is reported that the latency period for  
40  
41 114 COVID-19 is 3~7 days on average and 14 days at most, five time points delay of virus infection  
42  
43 115 were taken into consideration, that is, weather data and existing confirmed cases count data were  
44  
45 116 collected on the day, three days before, seven days before, 3~7 days before, and 14 days before  
46  
47 117 collecting the epidemiological data.  
48  
49  
50  
51

52 118 To investigate whether the influence of meteorological factors is linear or quadric, both  
53  
54 119 linear and non-linear modeling were performed under different relationship assumptions to  
55  
56  
57  
58  
59  
60

1  
2  
3 120 compare model fitness statistics. Each meteorological variable was fitted into a bunch of single-  
4  
5 121 factor models (either generalized linear model or polynomial model) through non-linear least  
6  
7  
8 122 squares (NLS) modeling using the Wuhan dataset with a 3~7 days delay of infection. The  
9  
10 123 relationship between each meteorological variable and confirmed new case count (linear or  
11  
12 124 quadric) was identified based on model fitness (log-likelihood, Akaike information criterion,  
13  
14  
15 125 Bayesian Information Criterion, etc.) and common knowledge of droplet-mediated viral diseases.

16  
17 126 Second, the proper time delay from weather exposure to COVID-19 confirmation was  
18  
19 127 investigated in the Wuhan dataset through Loess regression interpolation and NLS modeling with  
20  
21  
22 128 the previously identified relationship for each meteorological variable. The most possible time  
23  
24 129 delay identified was taken for subsequent analyses.

25  
26 130 The contribution of each meteorological factor to the case counts was first investigated with  
27  
28  
29 131 the Wuhan dataset under the assumption of previously defined time delay through Spearman's  
30  
31 132 correlation test. Then, we performed single-factor NLS regression modeling for each  
32  
33 133 meteorological variable in the discovery dataset (all Chinese cities with monthly confirmed cases  
34  
35 134 over 50) under the assumption of previously determined relationship and pre-defined time delay,  
36  
37  
38 135 to determine the exact coefficients accompanied with each meteorological factor and to find out  
39  
40 136 the most suitable environmental condition for SARS-CoV-2.

41  
42 137 Then, two final prediction models (short-term model and long-term model) were developed  
43  
44  
45 138 using the discovery dataset with the previously determined coefficients. The prediction model  
46  
47 139 supposed that all the meteorological variables, with their specific coefficients determined by  
48  
49 140 single-factor modeling, were added together to compose a weather coefficient. The new  
50  
51  
52 141 confirmed case count on the test day is calculated by multiplying the weather coefficient with the  
53  
54 142 existing confirmed case count on the exposure day (the time delay between test day and exposure  
55  
56 143 day is determined in previous analysis), and then multiply by a constant coefficient. The short-

1  
2  
3 144 term model took all four variables, while the long-term model only considered temperature as it  
4  
5  
6 145 is easy to be forecasted. There was a constant coefficient for the total equation, that was  
7  
8 146 multiplied by the existing confirmed case count. Its exact value was determined by model fitting  
9  
10 147 in the discovery dataset. The influence of geographic factors, i.e., latitude and elevation, was  
11  
12 148 investigated with all datasets covering the world's top cities and areas. The correlation of existing  
13  
14  
15 149 confirmed case counts with newly confirmed case counts was also investigated. Basic statistics  
16  
17 150 and modeling was conducted in R 3.5.1 (<https://cran.r-project.org/>).  
18

### 19 151 Model validation and application

20  
21  
22 152 The best fitted model was validated in the replication datasets (Italian city-level data and  
23  
24 153 other nation-level data) by correlating the observed actual epidemiological data with the  
25  
26 154 predicted values from the model in the datasets. We used these fitted models to calculate a  
27  
28  
29 155 predicted value for case counts for each studied site, and then compared this predicted value with  
30  
31 156 the real observed case counts by calculating a Spearman's correlation coefficient  $\rho$  between them.  
32

### 33 157 Patient and Public Involvement

34  
35 158 No specific patients were included in the current study. Epidemiological data were  
36  
37  
38 159 downloaded from online open-source databases. The public were not involved in the planning  
39  
40 160 and design of the study.  
41

## 42 161 **Results**

### 43 44 45 162 The Weather's influence on SARS-CoV-2 transmission displays 3~7 days time delay

46  
47  
48 163 The ranges of average temperature, relative humidity, wind speed, and visibility in the replication  
49  
50 164 datasets were similar to those in the discovery dataset (see Supplementary Results for detailed  
51  
52 165 datasets description). Non-linear modeling with Wuhan dataset under the assumption of 3~7 days  
53  
54  
55 166 delay of infection confirmation suggested that the effect of temperature and wind speed is better  
56  
57  
58  
59  
60

1  
2  
3 167 depicted as quadric (Table S1), which was also supported by Loess regression interpolation (Fig.  
4  
5 168 1). The mode for relative humidity and visibility was hard to be determined, as statistics  
6  
7 supported both relationships (Table S1). Considering the common knowledge of coronavirus  
8 169  
9 transmission and the trend showed by Loess regression interpolation, relative humidity exerted its  
10 170  
11 impact in a quadric trend while visibility exerted its impact in a linear trend (Fig. 1,  
12 171  
13 Supplementary results).  
14  
15 172

16  
17 173 Furthermore, investigation of the time delay effect in the Wuhan dataset showed that the number  
18  
19 of confirmed new cases was best correlated with air temperature 3~7 days ago, relative humidity  
20 174  
21 and visibility 7 days ago, and wind speed on the exposure day (Table S2). By comprehensive  
22 175  
23 consideration of all four meteorological variables and the differences between statistics values,  
24 176  
25 the weather 3~7 days ago, as well as weather one week ago, could well predict COVID-19  
26  
27 177 outbreak. It coincided with the latency period of 3~7 days for SARS-CoV-2, that is, exposure  
28  
29 178 under certain adverse weather might exhibit its effect after 3~7 days.  
30  
31 179

### 34 180 Contribution of single meteorological factor to the outbreak

35  
36

37 181 In the Wuhan dataset, the new case count was significantly positively correlated with temperature  
38  
39 182 (Spearman's correlation  $\rho = 0.69$ ,  $p < 0.001$ ) and visibility ( $\rho = 0.43$ ,  $p = 0.04$ ), and negatively  
40  
41 183 correlated with wind speed ( $\rho = -0.45$ ,  $p = 0.03$ ) and relative humidity ( $\rho = -0.33$ ,  $p = 0.12$ ) 3~7  
42  
43 days ago. It suggested that temperature was correlated with the outbreak best, followed by wind  
44 184  
45 speed, visibility, and relative humidity. A model only with temperature as a parameter could  
46 185  
47 already explained 45% of the variance in the epidemic data ( $p = 4 \times 10^{-4}$ ), while wind speed and  
48 186  
49 visibility could explain over 25% of the variance. According to the fitted single-factor models  
50  
51 187 (temperature, relative humidity, and wind speed were fitted into quadratic models; and visibility  
52  
53 188 was fitted into a linear model, see the Supplementary Results for details), SARS-CoV-2  
54  
55 189

transmission reaches a peak when mean temperature is 6.18 °C (Fig. 2A), relative humidity is 78.47% (Fig. 2B), and wind speed is 1.88 meter /second (m/s) (Fig. 2C); and its transmission rate decreases with the increase of visibility (Fig. 2D). The effects of geographic factors such as latitude and elevation, and the pure influence from the existing case count were further investigated in the worldwide datasets (Fig. S1), illustrating that COVID-19 mainly outbreaks at latitude 30°~50° (Fig. S1A) and elevation < 500 metre (Fig. S1B). New confirmed case count was positively correlated with the existing confirmed case count (Fig. S1C).

### Short-term prediction model

We further derived a full model combined with all four meteorological variables and fitted this model with the discovery dataset (Supplementary Results). The best-fitted short-term model was as follows:

New Case Count

$$= (-0.11 \times T^2 + 1.40 \times T - 0.058 \times RH^2 + 9.04 \times RH - 1.36 \times SPD^2 + 5.12 \times SPD - 7.02 \times VSB - 126.66) \times \alpha \times \text{Existing Confirmed Case Count}$$

where T is temperature in °C, RH is relative humidity in percentage, SPD is wind speed in m/s, VSB is visibility in statute miles,  $\alpha$  is a site-specific constant, with a default of 0.001. All parameters take the means of values 3~7 days before the day new case count is evaluated.

In this model, all the four meteorological variables are added together in their proper forms to compose a "weather coefficient" (the equation in brackets), which affects the transmission rate of SARS-CoV-2, and thus influences the number of people that catch infection from the existing confirmed cases, which then determines the new confirmed case count 3~7 days later. There is a multiplicative constant coefficient  $\alpha$  in the equation, which seems site-related. This constant coefficient could adjust the strength of the "weather coefficient" on disease transmission. When



1  
2  
3 211 we substitute replication datasets into this short-term model with the multiplicative constant  
4  
5 212 coefficient  $\alpha$  originally determined by the discovery dataset (which was 0.00048), an obvious  
6  
7  
8 213 underestimation of predicted values against real ones was observed although the predicted values  
9  
10 214 correlated with the real ones very well. We supposed it was due to site-specific difference in the  
11  
12 215 multiplicative constant coefficient  $\alpha$  since the discovery dataset was all Chinese areas where the  
13  
14  
15 216 pandemic had been controlled early. Thus, we further re-fitted this composed model with all  
16  
17 217 datasets to determine a more accurate value of the multiplicative constant coefficient  $\alpha$ , which  
18  
19 218 was 0.001 then. In practical application, we need to first plot the observed case count vs.  
20  
21  
22 219 predicted one with a default  $\alpha$  value 0.001, and then examine the extent of underestimation or  
23  
24 220 overestimation, to finally determine a proper multiplicative constant coefficient  $\alpha$  to adjust the  
25  
26 221 impact size of "weather coefficient" for a certain site.  
27

28  
29 222 Substitute data from the past two months, a good prediction performance was obtained for  
30  
31 223 this short-term model, with the predicted values significantly correlated to the observed ones for  
32  
33 224 most areas (Fig. 3). However, only the existing confirmed case count data could not predict the  
34  
35 225 new case count 3~7 days later as well as the weather-combined model did (Table S3).  
36

### 37 38 226 Different modes of viral transmission illustrated by the model 39

40 227 The observed versus predicted data exhibited different correlation patterns for different areas,  
41  
42 228 meaning different viral transmission modes, which may indicate the effect of epidemic control  
43  
44  
45 229 for certain area.

46  
47 230 Data from Chinese top-affected cities were not very well predicted and obviously  
48  
49 231 overestimated by this model with the default multiplicative constant coefficient  $\alpha$  ( $\rho = 0.11$ ,  $p <$   
50  
51 232  $0.001$ ; Fig. 3A). It might be due to the reason that most Chinese cities took actions quickly after  
52  
53  
54 233 the outbreak in Wuhan was reported, thus, these cities were under strict epidemic prevention  
55  
56  
57  
58  
59

measures at the beginning of the pandemic. This viral transmission mode suggested by the not well correlated prediction pattern is called "restricted".

For Wuhan city and some early outbreak countries (Japan, Korea, Iran, and Italy), the predicted outbreak was well correlated with the actual observations at the beginning when the existing confirmed cases were not in very large numbers, but the prediction deviates from the observation as the confirmed cases increase, in detail, there's large overestimation of prediction ( $\rho_{\text{Wuhan}} = 0.69$ ,  $\rho_{\text{Italy}} = 0.87$ ,  $\rho_{\text{Japan}} = 0.80$ ,  $\rho_{\text{Iran}} = 0.86$ ,  $p < 0.001$ ,  $\rho_{\text{Korea}} = 0.43$ ,  $p = 0.002$ ; Fig. 3B). It is of notice that the dramatic deviation of predictions for Wuhan occurred after February 15, the day when shelter hospitals had been put into use for seven days (the average latency period for COVID-19). Therefore, the deviated prediction pattern indicates that the outbreak prevention and control taken in these areas is effective (so-called "controlled" mode). The number of cases had been decreased by 72% for Wuhan, over 95% for Korea, Japan, and Italy, and 37% for Iran at most due to epidemic control (the largest gap between prediction and observation).

For most European and American countries, the predicted outbreak was linear correlated with the observed data very well ( $\rho_{\text{France}} = 0.96$ ,  $\rho_{\text{United States}} = 0.93$ ,  $\rho_{\text{United Kingdom}} = 0.83$ ,  $\rho_{\text{Spain}} = 0.97$ ,  $\rho_{\text{Germany}} = 0.94$ ,  $p < 0.001$ ; Fig. 3C), suggesting a natural viral transmission mode without much man-made epidemic prevention and control measures. Estimation of daily new case counts by this short-term model performed very well for European countries, while this model underestimated the outbreak in the United States.

Although the weather is not suitable for tropical areas, the viral transmitted in natural mode, manifested as good linear correlation between the prediction and the observation ( $\rho_{\text{India}} = 0.94$ ,  $\rho_{\text{Singapore}} = 0.66$ ,  $p < 0.001$ ,  $\rho_{\text{Thailand}} = 0.56$ ,  $p = 0.001$ ; Fig. 3D), with just relatively small daily new case counts compared to temperate regions.

1  
2  
3 257 Countries in the southern hemisphere displayed similar pattern as the "controlled" with large  
4  
5  
6 258 overestimation by the model when the confirmed cases increase, leading to not good prediction  
7  
8 259 performance ( $\rho_{\text{Australia}} = 0.79$ ,  $p < 0.001$ ,  $\rho_{\text{South Africa}} = 0.34$ ,  $p = 0.08$ ; Fig. 3E). It might be due to  
9  
10 260 the effect of epidemic prevention measures and hot summer weather in these countries.

### 11 12 261 Long-term simplified model

13  
14  
15 262 Long-term prediction depends on weather forecast, which generally reports only average  
16  
17  
18 263 temperature. As temperature 14 days ago could predict COVID-19 outbreak as well as  
19  
20 264 temperature in a short time delay (3~7 days ago), we again performed single-factor regression  
21  
22 265 modeling in the discovery dataset, taking temperature 14 days ago as an input, assuming a  
23  
24 266 quadric function (Supplementary Results). This simplified model with average temperature as a  
25  
26  
27 267 weather factor was derived as follows:

$$28$$
$$29 \text{ new case count} = (-0.10 \times T^2 + 1.11 \times T + 46.42) \times \beta \times \text{Existing Confirmed Case Count}$$
$$30$$

31  
32 269 where T is temperature in °C,  $\beta$  is a site-related multiplicative constant coefficient, with a default  
33  
34  
35 270 of 0.006. All parameters take values 14 days before the day new case count is evaluated.

36  
37  
38 271 With the model, the prediction performance was still good ( $\rho = 0.66$  in the replication datasets,  $p$   
39  
40 272  $< 0.001$ ; Fig. 3F). The long-term simplified prediction model also showed five prediction-  
41  
42 273 observation correlation patterns (Fig. 3F), indicating different modes of viral transmission, for the  
43  
44  
45 274 studied areas. This model could directly predict the newly emerging cases 14 days later, and be  
46  
47 275 used to predict COVID-19 outbreak in the future month by summing up the daily new case count  
48  
49 276 and combining weather forecast (usually available for the future 15 days).

## 50 51 52 277 **Discussion**

1  
2  
3 278 This research discovers nonlinear dose-response relationship for meteorological factors, in  
4  
5  
6 279 consistency with previous studies (12). Predictions of COVID-19 outbreak scale by the models  
7  
8 280 were well correlated with the observations around the world, suggesting the importance of  
9  
10 281 weather in SARS-CoV-2 transmission. Previous studies have implied the spread of many  
11  
12 282 respiratory infectious diseases, such as influenza, is dependent upon temperature and relative  
13  
14  
15 283 humidity (5,6). Recent published papers on preprint servers have reported roles of temperature  
16  
17 284 and absolute humidity in the COVID-19 transmission, but their conclusions are diverse (8-13). In  
18  
19 285 contrast to the findings by Cai et al (8), this study suggests significant impact of mean  
20  
21  
22 286 temperature on the daily new case count, indicating a need for sufficient time delay between  
23  
24 287 exposure and confirmation for weather to exhibit its effect. In contrary to other two studies (9,10),  
25  
26 288 this research suggests that there is a relatively not wide temperature and humidity ranges for the  
27  
28  
29 289 pandemic. There is an optimal temperature for SARS-CoV-2 at 6.18 °C, which is colder than that  
30  
31 290 suggested by Bu et al (14) but in consistency with the estimation by Wang et al (12); and most  
32  
33 291 areas with large spread locate in the humidity range of 60% ~ 90%, more humid than Bu et al  
34  
35 292 suggested (14). It is of notice that different from other viral respiratory diseases such as  
36  
37  
38 293 influenza(15)(16), high relative humidity is better for SARS-CoV-2 to spread, suggesting that a  
39  
40 294 sufficient amount of droplets in the air to support the suspension of SARS-CoV-2 is more  
41  
42 295 important for the spread than the effect of dry air on the human immune system. Different from  
43  
44  
45 296 other studies (17), this study also finds significant involvement of wind speed, in a quadric  
46  
47 297 manner, indicating that mild wind might be more suitable for the virus to suspend in the air. In  
48  
49 298 addition, the current study discovered that visibility was significantly negatively correlated with  
50  
51  
52 299 new case count and played a more important role in viral spread than humidity did (from  
53  
54 300 spearman's correlation coefficient comparison). As visibility reflects the amount of particles (e.g.,  
55  
56 301 dust and air pollutants) in the air while humidity reflects the amount of water in the air, it may

1  
2  
3 302 indicates that SARS-CoV-2 is more likely to cling to solid particles than droplets. New case  
4  
5 303 count decreases rapidly when visibility is high than 13 statute miles, indicating that caution  
6  
7  
8 304 should be taken if visibility drops below 10 statute miles.  
9

10  
11 305 In the prediction model, there is a multiplicative constant coefficient which determines the  
12  
13 306 strength of the weather coefficient on the epidemic transmission. It seems site-specific, as  
14  
15 307 adjusting it could make the prediction for one site very close to the observation. This constant  
16  
17 308 might reflect the influence of a couple of site-specific confounding factors, such as epidemic  
18  
19  
20 309 control measures, sun radiation, and population density. Various degrees of isolation for various  
21  
22 310 areas around the world lead to different degrees of weather effect. When evaluate the prediction  
23  
24 311 performance by the short-term model and the long-term model, they both exhibit different  
25  
26  
27 312 prediction-observation correlation patterns (Fig. 3), suggesting that changes in the degree of  
28  
29 313 epidemic control and isolation policy would lead to deviation from the original prediction and  
30  
31 314 thus different prediction-observation correlation patterns. Therefore, by plotting the predicted  
32  
33 315 versus observed new case counts and adjusting the multiplicative constant coefficient ( $\alpha$  and  $\beta$ ), it  
34  
35  
36 316 would be easy to evaluate the effect of epidemic prevention measures. It is of notice that the  
37  
38 317 observed case counts dropped dramatically from the predictions for Wuhan seven days after their  
39  
40 318 shelter hospitals were put in use, suggesting the importance and necessity of building shelter  
41  
42  
43 319 hospitals for strict isolation rather than just home isolation. With the use of shelter hospitals and  
44  
45 320 very strict isolation measures, the outbreak in one area could be reduced by 52~99% compared to  
46  
47 321 natural transmission mode. Another thing worth attention is that although the weather in tropical  
48  
49  
50 322 areas like India is not suitable for viral survival and transmission, SARS-CoV-2 still keeps on  
51  
52 323 spreading in a linear fashion in these areas, with just low growth rate of the outbreak. Therefore,  
53  
54 324 these tropical areas should still be on the alert against future outbreak of COVID-19.  
55  
56  
57  
58  
59

1  
2  
3 325 Although those cases with travel history to China or indicated by the World Health Organization  
4  
5 326 as "imported case only" were excluded in this study to make the world data most likely local  
6  
7  
8 327 transmitted, it was difficult to separate the imported cases from local transmission very well in  
9  
10 328 practice. It might explain the not excellent correlations of predictions with observations.  
11  
12 329 Furthermore, the relationship of weather and COVID-19 could be complex, since the human  
13  
14  
15 330 immune system has an innate seasonal rhythm, and the immune system could also be affected by  
16  
17 331 weather *vice versa*. For example, dry air would reduce the amount of mucus on the airway  
18  
19 332 mucosa, and thus increase the probability of viral invasion, while wet air would provide droplets  
20  
21  
22 333 for virus to adhere.

23  
24 334 There are several limitations of this study. First of all, this prediction model (especially the long-  
25  
26  
27 335 term model) might be more suitable and accurate for temporal areas in spring, autumn, and winter,  
28  
29 336 as the models were derived using Chinese datasets, mainly in the first three months of 2020. The  
30  
31 337 prediction became inaccurate and even improper under hot weather (i.e., the predicted values of  
32  
33  
34 338 long-term model become negative when air temperature is higher than 28 °C ), which might  
35  
36 339 explain the obvious bad prediction performance for countries in the southern hemisphere and  
37  
38  
39 340 tropical areas. One explanation for the inaccurate prediction in areas with high temperature could  
40  
41 341 be that SARS-CoV-2 transmission in these areas was mainly not influenced by weather, but in  
42  
43 342 another direct transmission way, such as face-to-face contact or spread in gathering crowd.  
44  
45 343 Second, it seems that the prediction performance drops with the increase in new case count,  
46  
47  
48 344 suggesting that the prediction model might become inaccurate and not suitable for very large new  
49  
50 345 case count. This could be due to (1) the influence of weather on COVID-19 spread might weaken  
51  
52 346 when the number of cases increases, while other factors such as social distance become more  
53  
54  
55 347 important at a later stage; (2) there was less data points with large new case count, which might

1  
2  
3 348 lead to larger variance. Third, the short-term prediction model must use all four meteorological  
4  
5 349 factors, while these factors are not always available for any one certain area. Fourth, this study  
6  
7 included various areas covering a long period into modeling, thus, there were a bunch of variable  
8 350  
9 confounding factors, such as population mobility and disinfection measures, which were not  
10 351  
11 controlled and thus could impede the model accuracy. Fifth, as we could only obtain country-  
12 352  
13 level epidemiological data, the corresponding meteorological data were obtained for their capital  
14  
15 353 cities, leading to not exact pairing of epidemiological data and meteorological data. Sixth, there is  
16  
17 354 a general lack of data and cases in the current study, since we only collected data covering two  
18  
19 355 and a half months while the pandemic has persisted over seven months up to now.  
20  
21  
22 356

## 23 24 25 357 **Conclusion**

26  
27  
28 358 In summary, this study has found significant correlations with the COVID-19 epidemic trend for  
29  
30 359 not only temperature and humidity, but also wind speed and visibility. It proposed a  
31  
32 360 comprehensive model for prediction of COVID-19 outbreak, composed of a short-term version  
33  
34 361 and a long-term version. The short-term version uses the combination of four meteorological  
35  
36 factors as a "weather coefficient" of the existing confirmed case count in the past week and can  
37 362  
38 be used to predict epidemic situation in the future three days; the short-term version uses average  
39 363  
40 temperature as the "weather coefficient" seven days ago and can predict the outbreak in one  
41 364  
42 month if combined with weather forecast. This model is easy to use for predicting the COVID-19  
43  
44 365 outbreak, by substituting weather data in the recent past week and obtaining an estimate of case  
45  
46 366 count for the future couple of days or month. This model will be very helpful for local  
47  
48 367 governments to make timely policies on epidemic control, for instance, the allocation of medical  
49  
50 368 equipments such as ventilators and medical resources such as hospitals, beds and health-care  
51  
52 workers, according to the prediction results.  
53 369  
54  
55 370

1  
2  
3 371  
4  
5  
6 372 **Acknowledgments:** We thank Dr. Zhisheng Huang for advices on data collecting and processing,  
7  
8 373 Dr. Siyuan Tan for technical support on analysis, Dr. Yonggao Chen for mathematical support on  
9  
10 modeling.  
11 374

12  
13 375 **Funding:** the Priority Academic Program Development of Jiangsu Higher Education Institutions  
14  
15 – the third period (NO.035062002003c), the Yizhong Research Fund of Jiangsu Provincial  
16 376 Hospital of Chinese Medicine (Y19066).  
17  
18 377

19  
20  
21 378 **Author contributions:** BC, YZ and XZ design and interpret the reported analyses and results;  
22  
23 379 HL, XY, YH, BZ, and MX participated in the acquisition of data; BC analyse the data, drafted,  
24  
25 380 and revised the manuscript; HL and XZ revised the manuscript; YZ and FT provided technical  
26  
27 support; XZ supervised the research.  
28 381

29  
30 382 **Competing interests:** Authors declare no competing interests.  
31  
32

33 383 **Data and materials availability:** Weather data and epidemiological data is all obtained from  
34  
35 public databases. Detailed modeling results are available upon request by emailing to Biqing  
36 384 Chen, bq\_chen@qq.com.  
37  
38 385

## 39 40 41 386 42 43 387 **References:**

- 46 388 1. Zhu N, Zhang D, Wang W, Li X, Yang B, Song J, et al. A novel coronavirus from patients  
47  
48 with pneumonia in China, 2019. N Engl J Med. 2020;382(8):727–33.  
49 389
- 51 390 2. Li Q, Guan X, Wu P, Wang X, Zhou L, Tong Y, et al. Early Transmission Dynamics in  
52  
53 Wuhan, China, of Novel Coronavirus–Infected Pneumonia. N Engl J Med.  
54 391  
55  
56 392 2020;382(13):1199–207.  
57  
58  
59  
60



- 1  
2  
3 393 3. Chan JFW, Yuan S, Kok KH, To KKW, Chu H, Yang J, et al. A familial cluster of  
4 pneumonia associated with the 2019 novel coronavirus indicating person-to-person  
5 394 pneumonia associated with the 2019 novel coronavirus indicating person-to-person  
6 transmission: a study of a family cluster. *Lancet* [Internet]. Elsevier Ltd;  
7 395 2020;395(10223):514–23. Available from: [http://dx.doi.org/10.1016-](http://dx.doi.org/10.1016/S0140-)  
8 396 [6736\(20\)30154-9](http://dx.doi.org/10.1016/S0140-6736(20)30154-9)  
9  
10  
11  
12 397  
13  
14
- 15 398 4. Organization WH. [https://www.who.int/emergencies/diseases/novel-coronavirus-](https://www.who.int/emergencies/diseases/novel-coronavirus-2019/situation-reports)  
16 2019/situation-reports [Internet]. 2020 [cited 2020 Mar 29]. Available from:  
17 399 <https://www.who.int/emergencies/diseases/novel-coronavirus-2019/situation-reports>  
18  
19  
20 400  
21  
22
- 23 401 5. Barreca AI, Shimshack JP. Absolute humidity, temperature, and influenza mortality: 30  
24 years of county-level evidence from the United States. *Amer J Epidemiol*. 2012;176(suppl.  
25 402 7):S114–22.  
26  
27 403  
28  
29
- 30 404 6. Lowen AC, Mubareka S, Steel J, Palese P. Influenza virus transmission is dependent on  
31 relative humidity and temperature. *PLoS Pathol*. 2007;3:e151.  
32 405  
33  
34
- 35 406 7. Bourouiba L. Turbulent Gas Clouds and Respiratory Pathogen Emissions Potential  
36 Implications for Reducing Transmission of COVID-19. *JAMA*. 2020;E1–2.  
37 407  
38  
39
- 40 408 8. Cai Y. The Effects of "Fangcang, Huoshenshan [Internet]. Available from:  
41 <https://www.medrxiv.org/content/10.1101/2020.02.26.20028472v3>  
42 409  
43  
44
- 45 410 9. Proverbio AM, Crotti N, Manfredi M, Zani A. Preliminary evidence that higher  
46 temperatures are associated with lower incidence of COVID-19, for cases reported  
47 411 globally up to 29th February 2020. *medRxiv*. 2020;(February).  
48  
49  
50 412  
51
- 52 10. <https://github.com/BlankerL/DXY-COVID-19-Data>.  
53 413  
54
- 55 11. <ftp://ftp.ncdc.noaa.gov/pub/data/noaa/2020/>. 2020.  
56 414  
57

1

2

3 415

4

5 416

6

7 417

8

9

10

11 418

12

13 419

14

15 420

16

17 421

18

19 422

20

21

22 423

23

24 424

25

26 425

27

28 426

29

30 427

31

32 428

33

34 429

35

36 430

37

38 431

39

40 432

41

42 433

43

44 434

45

46 435

47

48 436

49

50 437

51

52 438

53

54

55

56

57

58

59

60

12. Wang M, Jiang A, Gong L, Lu L, Guo W, Li C, et al. Temperature Significantly Change COVID-19 Transmission in 429 cities. Block Caving – A Viable Altern [Internet]. 2020; Available from: <https://www.medrxiv.org/content/10.1101/2020.02.22.20025791v1>
13. Luo W, Majumder MS, Liu D, Poirier C, Mandl KD, Lipsitch M, et al. The role of absolute humidity on transmission rates of the COVID-19 outbreak. medRxiv [Internet]. 2020;2020.02.12.20022467. Available from: <http://medrxiv.org/content/early/2020/02/17/2020.02.12.20022467.abstract%0Ahttps://www.medrxiv.org/content/10.1101/2020.02.12.20022467v1>
14. Bu J, Peng D-D, Xiao H, Yue Q, Han Y, Lin Y, et al. Analysis of meteorological conditions and prediction of epidemic trend of 2019-nCoV infection in 2020. medRxiv [Internet]. 2020;(May):2020.02.13.20022715. Available from: <https://www.medrxiv.org/content/10.1101/2020.02.13.20022715v1>
15. Peci A, Winter AL, Li Y, Gnaneshan S, Liu J, Mubareka S, et al. Effects of Absolute Humidity, Relative Humidity, Temperature, and Wind Speed on Influenza Activity in Toronto, Ontario, Canada. *Appl Env Microbiol*. 2019;85(6):e02426-18.
16. Kudo E, Song E, Yockey LJ, Rakib T, Wong PW, Homer RJ, et al. Low ambient humidity impairs barrier function and innate resistance against influenza infection. *Proc Natl Acad Sci U S A*. 2019;116(22):10905–10.
17. Oliveiros B, Caramelo L, Ferreira NC, Caramelo F. Role of temperature and humidity in the modulation of the doubling time of COVID-19 cases. medRxiv [Internet]. 2020; Available from: <https://www.medrxiv.org/content/10.1101/2020.03.05.20031872v1>

## FIGURE LEGENDS

**Fig. 1.** Loess regression interpolation of confirmed new case count to the four meteorological variables, (A) average temperature (T) in °C, (B) relative humidity (RH) in %, (C) wind speed (SPD) in meter per second (m/s), (D) visibility (VSB) in statute miles, for Wuhan city. Five time point's delay of confirmation from viral infection are displayed together in one figure, namely, exposure on the day, three days before, seven days before, 3~7 days before, and 14 days before.

**Fig. 2.** Scatterplots of confirmed new case counts to the four meteorological variables, (A) average temperature (T) in °C, (B) relative humidity (RH) in %, (C) wind speed (SPD) in meter per second (m/s), (D) visibility (VSB) in statute miles, for all the studied datasets. Quadric regression for T, RH, and SPD, and linear regression for VSB are illustrated for each dataset. Interpolation curves with 95% confidence intervals are shown in shadow. The discovery dataset includes the major outbreak Chinese cities, while the replication datasets included provincial data in Italy, and national data around the world(except China).

**Fig. 3.** The observed daily new case counts versus the predicted values by the short-term model (A-E) and the long-term model (F) are illustrated for all the studied areas. The plots exhibit five prediction-observation correlation patterns, which indicates five viral transmission modes: (A) the "restricted" pattern including the Chinese top affected cities excluding Wuhan; (B) the "controlled" pattern including early outbreak areas, namely, Iran, Italy, Japan, and Korea, and Chinese Wuhan city; (C) the "natural" pattern including late outbreak European and American countries, namely, France, Germany, Spain, United Kingdom, and United States; (D) the "tropical" pattern including tropical countries India, Singapore, and Thailand; (E) the "southern" pattern including countries in the southern hemisphere, Australia and South Africa. Each dot

1  
2  
3  
4  
5  
6  
7  
8  
9  
10  
11  
12  
13  
14  
15  
16  
17  
18  
19  
20  
21  
22  
23  
24  
25  
26  
27  
28  
29  
30  
31  
32  
33  
34  
35  
36  
37  
38  
39  
40  
41  
42  
43  
44  
45  
46  
47  
48  
49  
50  
51  
52  
53  
54  
55  
56  
57  
58  
59  
60

458 represents one day. Loess regression (A, B, E) and linear regression (C, D) interpolation curves  
459 are illustrated for each dataset, with 95% confidence intervals showing in shadow. The black  
460 solid line represents that the observed values are equal to the predicted ones, and dots closer to  
461 this line means better prediction performance.

For peer review only



Fig. 1. Loess regression interpolation of confirmed new case count to the four meteorological variables, (A) average temperature (T) in °C, (B) relative humidity (RH) in %, (C) wind speed (SPD) in meter per second (m/s), (D) visibility (VSB) in statute miles, for Wuhan city. Five time point's delay of confirmation from viral infection are displayed together in one figure, namely, exposure on the day, three days before, seven days before, 3~7 days before, and 14 days before.

207x156mm (300 x 300 DPI)



32 Fig. 2. Scatterplots of confirmed new case counts to the four meteorological variables, (A) average  
33 temperature (T) in °C, (B) relative humidity (RH) in %, (C) wind speed (SPD) in meter per second (m/s), (D)  
34 visibility (VSB) in statute miles, for all the studied datasets. Quadric regression for T, RH, and SPD, and  
35 linear regression for VSB are illustrated for each dataset. Interpolation curves with 95% confidence intervals  
36 are shown in shadow. The discovery dataset includes the major outbreak Chinese cities, while the replication  
37 datasets included provincial data in Italy, and national data around the world(except China).

38 218x172mm (300 x 300 DPI)



Fig. 3. The observed daily new case counts versus the predicted values by the short-term model (A-E) and the long-term model (F) are illustrated for all the studied areas. The plots exhibit five prediction-observation correlation patterns, which indicates five viral transmission modes: (A) the "restricted" pattern including the Chinese top affected cities excluding Wuhan; (B) the "controlled" pattern including early outbreak areas, namely, Iran, Italy, Japan, and Korea, and Chinese Wuhan city; (C) the "natural" pattern including late outbreak European and American countries, namely, France, Germany, Spain, United Kingdom, and United States; (D) the "tropical" pattern including tropical countries India, Singapore, and Thailand; (E) the "southern" pattern including countries in the southern hemisphere, Australia and South Africa. Each dot represents one day. Loess regression (A, B, E) and linear regression (C, D) interpolation curves are illustrated for each dataset, with 95% confidence intervals showing in shadow. The black solid line represents that the observed values are equal to the predicted ones, and dots closer to this line means better prediction performance.

209x244mm (300 x 300 DPI)

## 1 **Supplementary Materials and Methods**

### 2 Epidemiological data

3 We scrutinized WHO's situation reports to rule out these countries with only  
4 imported cases, and only collected the confirmed cases with possible or confirmed  
5 local transmission (i.e., without recent travel history to China).

6 For Wuhan city, there was a shortage of test kits at the beginning of the pandemic,  
7 which would make confirmed case counts much lower than the actual data, thus, we  
8 discarded epidemic data before January 28th, the day when domestic test kits have  
9 been approved, produced in large quantities, and were available for Wuhan hospitals.  
10 As there was a cut down problem for the existing confirmed case count on February  
11 20th for Wuhan, when modeling with the existing confirmed case count, only data  
12 before February 20th were used.

### 13 Weather data

14 Temperature and dew point displayed in Fahrenheit were transformed into  
15 Celsius forms, and relative humidity was calculated from temperature and dew point  
16 using the following formula for each time point:

$$RH = \begin{cases} e^{\frac{7.5D}{237.3+D} - \frac{7.5T}{237.3+T}} \times 100\%, & T < 0 \\ 10^{\frac{7.5D}{237.3+D} - \frac{7.5T}{237.3+T}} \times 100\%, & T \geq 0 \end{cases}$$

17 where RH is the relative humidity, D is the dew point in degrees Celsius, T is the  
18 temperature in degrees Celsius, and  $e$  is the base of the natural log.

19 For each city with epidemiological data, the meteorological station in that city or  
20 that was closest to the latitude and longitude coordinates of the city center was chosen.



1  
2  
3  
4 21 For a city with more than one meteorological stations, the one nearest to the city  
5  
6 22 center was chosen. For a province with epidemiological data, the meteorological  
7  
8  
9 23 station in the capital city of that province was chosen. For a country with only  
10  
11  
12 24 national wide epidemiological data, weather data were averaged across all the  
13  
14  
15 25 meteorological observatories in the cities where outbreak was officially reported.  
16  
17 26 Latitude and elevation for the meteorological observatories were also collected.

### 18 19 27 Statistical modeling

20  
21  
22 28 Only one city Wuhan was chosen for illustrating the time delay effect because it  
23  
24 29 is the first city to have an outbreak of COVID-19, there was none reported imported  
25  
26  
27 30 cases for Wuhan, which might obscure the correlation between weather and virus  
28  
29  
30 31 transmission.

### 31 32 32 **Supplementary Results**

#### 33 33 Datasets description

34  
35 34 Only Chinese cities with monthly confirmed cases over 50 were included in the  
36  
37 35 discovery dataset, which was 60 cities including Wuhan. The confirmed new cases in  
38  
39  
40 36 Wuhan on February 13, 2020, reached 13,436, which was oddly high as the daily  
41  
42  
43 37 confirmed new cases were no larger than 3,000 on all the other dates in Wuhan or in  
44  
45  
46 38 all the other Chinese cities. We suppose that it might be due to abrupt large  
47  
48  
49 39 supplement of virus test kits or data correction on that day. In order to reduce the  
50  
51  
52 40 potential contamination of modeling by this outlier, data on that day were discarded  
53  
54  
55 41 from the subsequent analysis. There were also two oddly large new confirmed case  
56  
57  
58 42 counts for Lombardy, which were discarded from the subsequent analysis. Except the  
59  
60

1  
2  
3  
4 43 outliers, the daily confirmed new cases in the discovery dataset ranged from 1 to  
5  
6 44 2,997, the average temperature ranged  $-22.54^{\circ}\text{C} \sim 22.16^{\circ}\text{C}$ , the wind speed ranged  
7  
8  
9 45  $0.56 \sim 9.29$  meter per second, visibility ranged  $1.3 \sim 18.8$  statute miles, and relative  
10  
11  
12 46 humidity ranged  $30.84\% \sim 98.52\%$ .

#### 13 14 47 Model selection

15  
16  
17 48 With the increase of relative humidity, the amount of droplets in the air increases,  
18  
19 49 leading to more virus load. However, as the air gets humid, human's respiratory tract  
20  
21  
22 50 could better defend virus infection. Thus, the relationship of relative humidity could  
23  
24  
25 51 be complex, not pure linear. Giving comprehensive consideration, we defined the  
26  
27 52 effect of relative humidity to be quadric. As for visibility, it only affects the amount of  
28  
29  
30 53 particles in the air, which is positively correlated with virus load. Thus, it is most  
31  
32  
33 54 probably to exert its effect linearly.

34  
35 55 Although relative humidity and visibility 7 days ago correlated with the  
36  
37 56 confirmed new case counts best, there was not great loss of model fitting statistics for  
38  
39  
40 57 relative humidity and visibility 3~7 days ago, as compared to the loss between 7 days  
41  
42  
43 58 time delay and 3~7 days time delay for temperature.

#### 44 45 59 Fitted models

46  
47  
48 60 The fitted single-factor models were as follows:

$$49 \quad \text{New Case Count} = -0.11305 \times T^2 + 1.39819 \times T + 45.11405$$

50  
51  
52 61 where T is temperature in  $^{\circ}\text{C}$ .

53  
54  
55 62 The estimate p-value for constant was  $< 0.001$ . The extremum was  $-1.39819/$   
56  
57  
58 63  $(2 \times (-0.11305)) = 6.183945 \text{ }^{\circ}\text{C}$ .

$$\text{New Case Count} = -0.05759 \times \text{RH}^2 + 9.038 \times \text{RH} - 303.0$$

64 where RH is relative humidity in percentage.

65 The extremum was  $-9.038/(2 \times (-0.05759)) = 78.46848 \%$ .

$$\text{New Case Count} = -1.360056 \times \text{SPD}^2 + 5.120123 \times \text{SPD} + 42.1855$$

66 where SPD is wind speed in meter per second (m/s).

67 The extremum was  $-5.120123/(2 \times (-1.360056)) = 1.882321 \text{ m/s}$ .

$$\text{New Case Count} = -7.021 \times \text{VSB} + 89.041$$

68 where VSB is visibility in statute miles.

69 The estimate p-value for VSB was  $< 0.01$ , constant was  $< 0.001$ .

70 Thus, the complex short-term model to be regressed was

New Case Count

$$\begin{aligned} &= (-0.11 \times T^2 + 1.40 \times T - 0.058 \times \text{RH}^2 + 9.04 \times \text{RH} - 1.36 \\ &\times \text{SPD}^2 + 5.12 \times \text{SPD} - 7.02 \times \text{VSB} - 126.66) \times a \\ &\times \text{Existing Confirmed Case Count} \end{aligned}$$

71 where a is a constant to be fitted. All parameters take values 3~7 days before the day

72 new case count is confirmed.

73 Through fitting this full model with the discovery data, a was estimated to be  
74 0.0004786 (standard error 0.0000128,  $p$ -values  $< 2e-16$ ).

75 For long-term model, the fitted model with temperature 14 days ago was as  
76 follows:

$$\text{New Case Count} = -0.10062 \times T^2 + 1.11189 \times T + 46.41792$$

77 The estimate p-value for constant was  $< 0.001$ . The extremum was  $-1.11189/$   
78  $(2 \times (-0.10062)) = 5.525194$ .

79 Thus, the simplified long-term model to be regressed was:

$$\begin{aligned} \text{New Case Count} \\ &= (-0.10 \times T^2 + 1.11 \times T + 46.42) \times b \\ &\times \text{Existing Confirmed Case Count} \end{aligned}$$

80 where b is a constant to be fitted. All parameters take values 14 days before the day  
81 new case count is confirmed.

82 Through fitting this simplified model with the discovery data, b was estimated to  
83 be 0.0061382 (standard error 0.0002666,  $p$ -values  $< 2e-16$ ).

84 Table S1. Model fitness statistics for comparing and selecting proper fitting

85 relationship

|                          | <b>sigma</b> | <b>finTol</b>        | <b>logLik</b> | <b>AIC</b> | <b>BIC</b> | <b>deviance</b> | <b>Corr</b> |
|--------------------------|--------------|----------------------|---------------|------------|------------|-----------------|-------------|
| <b>Temperature</b>       |              |                      |               |            |            |                 |             |
| <b>Linear</b>            | 493          | $4.5 \times 10^{-8}$ | -167          | 339        | 342        | 4860391         | 0.757       |
| <b>Quadric</b>           | 421          | $1.3 \times 10^{-7}$ | -163          | 333        | 337        | 3370230         | 0.812       |
| <b>Relative humidity</b> |              |                      |               |            |            |                 |             |
| <b>Linear</b>            | 627          | $9.8 \times 10^{-8}$ | -172          | 350        | 353        | 7855418         | 0.401       |
| <b>Quadric</b>           | 626          | $8.4 \times 10^{-6}$ | -171          | 351        | 355        | 7442367         | 0.358       |
| <b>Wind speed</b>        |              |                      |               |            |            |                 |             |
| <b>Linear</b>            | 585          | $3.1 \times 10^{-8}$ | -170          | 347        | 350        | 6840545         | 0.380       |
| <b>Quadric</b>           | 546          | $2.4 \times 10^{-7}$ | -168          | 344        | 349        | 5654728         | 0.423       |
| <b>Visibility</b>        |              |                      |               |            |            |                 |             |
| <b>Linear</b>            | 594          | $3.3 \times 10^{-8}$ | -171          | 347        | 351        | 7059799         | 0.354       |
| <b>Quadric</b>           | 598          | $7.9 \times 10^{-7}$ | -170          | 349        | 353        | 6799355         | 0.358       |

86 Note: sigma, estimated standard error of the residuals; finTol, the achieved convergence tolerance; logLik, the

87 log-likelihood of the model; AIC, Akaike's Information Criterion for the model; BIC, Bayesian Information

88 Criterion for the model; deviance, deviance of the model; Corr, Spearman's correlation coefficient between the real

89 values and the predicted values by the predisposed model.

90

91 Table S2. Model fitness statistics for comparing and selecting proper time delay of

92 virus exposure

|                          | <b>sigma</b> | <b>finTol</b>        | <b>logLik</b> | <b>AIC</b> | <b>BIC</b> | <b>deviance</b> | <b>Corr</b> |
|--------------------------|--------------|----------------------|---------------|------------|------------|-----------------|-------------|
| <b>Temperature</b>       |              |                      |               |            |            |                 |             |
| <b>Day 0</b>             | 626          | $2.6 \times 10^{-8}$ | -171          | 351        | 355        | 7441513         | 0.330       |
| <b>Day -3</b>            | 605          | $1.3 \times 10^{-8}$ | -171          | 349        | 353        | 6953553         | 0.479       |
| <b>Day -7</b>            | 664          | $5.4 \times 10^{-8}$ | -173          | 353        | 358        | 8386957         | 0.262       |
| <b>Day -14</b>           | 528          | $1.1 \times 10^{-7}$ | -168          | 343        | 347        | 5297229         | 0.534       |
| <b>Day -3 ~ -7</b>       | 421          | $1.3 \times 10^{-7}$ | -163          | 333        | 337        | 3370230         | 0.812       |
| <b>Relative humidity</b> |              |                      |               |            |            |                 |             |
| <b>Day 0</b>             | 605          | $5.9 \times 10^{-6}$ | -171          | 349        | 353        | 6953396         | 0.389       |
| <b>Day -3</b>            | 679          | $4.3 \times 10^{-6}$ | -173          | 354        | 359        | 8768069         | 0.065       |
| <b>Day -7</b>            | 560          | $5.0 \times 10^{-8}$ | -169          | 346        | 350        | 5962416         | 0.524       |
| <b>Day -14</b>           | 605          | $9.1 \times 10^{-6}$ | -171          | 349        | 353        | 6962609         | 0.326       |
| <b>Day -3 ~ -7</b>       | 626          | $8.4 \times 10^{-6}$ | -171          | 351        | 355        | 7442367         | 0.358       |
| <b>Wind speed</b>        |              |                      |               |            |            |                 |             |
| <b>Day 0</b>             | 526          | $7.4 \times 10^{-8}$ | -167          | 343        | 347        | 5251026         | 0.500       |
| <b>Day -3</b>            | 663          | $1.4 \times 10^{-8}$ | -173          | 353        | 357        | 8343427         | 0.268       |
| <b>Day -7</b>            | 559          | $1.1 \times 10^{-8}$ | -169          | 346        | 350        | 5926891         | 0.516       |
| <b>Day -14</b>           | 674          | $5.2 \times 10^{-8}$ | -173          | 354        | 358.       | 8643076         | 0.014       |
| <b>Day -3 ~ -7</b>       | 546          | $2.4 \times 10^{-7}$ | -168          | 344        | 349        | 5654728         | 0.423       |
| <b>Visibility</b>        |              |                      |               |            |            |                 |             |

|                    |     |                      |      |     |     |         |       |
|--------------------|-----|----------------------|------|-----|-----|---------|-------|
| <b>Day 0</b>       | 646 | $4.2 \times 10^{-9}$ | -173 | 351 | 354 | 8343221 | 0.286 |
| <b>Day -3</b>      | 663 | $5.1 \times 10^{-8}$ | -173 | 352 | 355 | 8804055 | 0.016 |
| <b>Day -7</b>      | 514 | $3.9 \times 10^{-8}$ | -168 | 341 | 344 | 5290247 | 0.502 |
| <b>Day -14</b>     | 635 | $1.1 \times 10^{-8}$ | -172 | 350 | 354 | 8052388 | 0.272 |
| <b>Day -3 ~ -7</b> | 594 | $3.3 \times 10^{-8}$ | -171 | 347 | 351 | 7059799 | 0.354 |

93 Note: sigma, estimated standard error of the residuals; finTol, the achieved convergence tolerance; logLik, the  
 94 log-likelihood of the model; AIC, Akaike's Information Criterion for the model; BIC, Bayesian Information  
 95 Criterion for the model; deviance, deviance of the model; Corr, Spearman's correlation coefficient between the real  
 96 values and the predicted values by the predisposed model.  
 97

98 Table S3. Model fitness statistics for weather-combined model and epidemic only

99 model

| Model                   | sigma | finTol               | logLik | AIC   | BIC   | deviance | Corr  |
|-------------------------|-------|----------------------|--------|-------|-------|----------|-------|
| <b>Weather-combined</b> | 147   | $1.8 \times 10^{-9}$ | -6239  | 12481 | 12491 | 21128810 | 0.171 |
| <b>Epidemic-only</b>    | 149   | $2.1 \times 10^{-8}$ | -6251  | 12507 | 12517 | 21689551 | 0.152 |

100 Note: The weather-combined model is the short-term model with multiplicative constant to be fitted. The  
 101 epidemic-only model is the model only with existing confirmed case count as an independent variable, assuming a  
 102 linear function.





103

104 **Fig. S1.** Scatterplots of new confirmed case count to (A) latitude, (B) elevation, and  
105 (C) the existing confirmed case count, for all the studied sites. Linear regression (C)  
106 interpolation curves are illustrated for each dataset, with 95% confidence intervals  
107 showing in shadow.

# BMJ Open

## Predicting the local COVID-19 outbreak around the world with meteorological conditions: a model-based qualitative study

|                                 |                                                                                                                                                                                                                                                                                                                                                                                                                                                                                                                                                                                                                                                                                                                                                                                                                                                                                                                                                                             |
|---------------------------------|-----------------------------------------------------------------------------------------------------------------------------------------------------------------------------------------------------------------------------------------------------------------------------------------------------------------------------------------------------------------------------------------------------------------------------------------------------------------------------------------------------------------------------------------------------------------------------------------------------------------------------------------------------------------------------------------------------------------------------------------------------------------------------------------------------------------------------------------------------------------------------------------------------------------------------------------------------------------------------|
| Journal:                        | <i>BMJ Open</i>                                                                                                                                                                                                                                                                                                                                                                                                                                                                                                                                                                                                                                                                                                                                                                                                                                                                                                                                                             |
| Manuscript ID                   | bmjopen-2020-041397.R3                                                                                                                                                                                                                                                                                                                                                                                                                                                                                                                                                                                                                                                                                                                                                                                                                                                                                                                                                      |
| Article Type:                   | Original research                                                                                                                                                                                                                                                                                                                                                                                                                                                                                                                                                                                                                                                                                                                                                                                                                                                                                                                                                           |
| Date Submitted by the Author:   | 28-Oct-2020                                                                                                                                                                                                                                                                                                                                                                                                                                                                                                                                                                                                                                                                                                                                                                                                                                                                                                                                                                 |
| Complete List of Authors:       | Chen, Biqing; Affiliated Hospital of Nanjing University of Chinese Medicine, Research Center of Chinese Medicine<br>Liang, Hao ; Affiliated Hospital of Nanjing University of Chinese Medicine, Department of Hematology<br>Yuan, Xiaomin ; Affiliated Hospital of Nanjing University of Chinese Medicine, Department of Colorectal Surgery<br>Hu, Yingying ; Affiliated Hospital of Nanjing University of Chinese Medicine, Department of Hematology<br>Xu, Miao; Affiliated Hospital of Nanjing University of Chinese Medicine, Department of Hematology<br>Zhao, Yating ; Nanjing University<br>Zhang, Binfen ; Affiliated Hospital of Nanjing University of Chinese Medicine, Department of Hematology<br>Tian, Fang ; Affiliated Hospital of Nanjing University of Chinese Medicine, Research Center of Chinese Medicine<br>Zhu, Xuejun ; Affiliated Hospital of Nanjing University of Chinese Medicine, Department of Hematology, Research Center of Chinese Medicine |
| <b>Primary Subject Heading</b>: | Epidemiology                                                                                                                                                                                                                                                                                                                                                                                                                                                                                                                                                                                                                                                                                                                                                                                                                                                                                                                                                                |
| Secondary Subject Heading:      | Global health, Infectious diseases, Occupational and environmental medicine, Public health, Qualitative research                                                                                                                                                                                                                                                                                                                                                                                                                                                                                                                                                                                                                                                                                                                                                                                                                                                            |
| Keywords:                       | Epidemiology < INFECTIOUS DISEASES, EPIDEMIOLOGY, Public health < INFECTIOUS DISEASES, Infection control < INFECTIOUS DISEASES, COVID-19                                                                                                                                                                                                                                                                                                                                                                                                                                                                                                                                                                                                                                                                                                                                                                                                                                    |
|                                 |                                                                                                                                                                                                                                                                                                                                                                                                                                                                                                                                                                                                                                                                                                                                                                                                                                                                                                                                                                             |

SCHOLARONE™  
Manuscripts



I, the Submitting Author has the right to grant and does grant on behalf of all authors of the Work (as defined in the below author licence), an exclusive licence and/or a non-exclusive licence for contributions from authors who are: i) UK Crown employees; ii) where BMJ has agreed a CC-BY licence shall apply, and/or iii) in accordance with the terms applicable for US Federal Government officers or employees acting as part of their official duties; on a worldwide, perpetual, irrevocable, royalty-free basis to BMJ Publishing Group Ltd ("BMJ") its licensees and where the relevant Journal is co-owned by BMJ to the co-owners of the Journal, to publish the Work in this journal and any other BMJ products and to exploit all rights, as set out in our [licence](#).

The Submitting Author accepts and understands that any supply made under these terms is made by BMJ to the Submitting Author unless you are acting as an employee on behalf of your employer or a postgraduate student of an affiliated institution which is paying any applicable article publishing charge ("APC") for Open Access articles. Where the Submitting Author wishes to make the Work available on an Open Access basis (and intends to pay the relevant APC), the terms of reuse of such Open Access shall be governed by a Creative Commons licence – details of these licences and which [Creative Commons](#) licence will apply to this Work are set out in our licence referred to above.

Other than as permitted in any relevant BMJ Author's Self Archiving Policies, I confirm this Work has not been accepted for publication elsewhere, is not being considered for publication elsewhere and does not duplicate material already published. I confirm all authors consent to publication of this Work and authorise the granting of this licence.

1  
2  
3  
4 1 **Title: Predicting the local COVID-19 outbreak around the world with**  
5  
6 2 **meteorological conditions: a model-based qualitative study**  
7  
8

9 3 **Authors:** Biqing Chen<sup>1</sup>, Hao Liang<sup>2</sup>, Xiaomin Yuan<sup>3</sup>, Yingying Hu<sup>2</sup>, Miao Xu<sup>2</sup>, Yating Zhao<sup>4</sup>,  
10 4 Binfen Zhang<sup>2</sup>, Fang Tian<sup>1</sup>, Xuejun Zhu<sup>1,2\*</sup>  
11  
12  
13

14  
15 5 **Affiliations:**  
16  
17

18 6 <sup>1</sup> Research Center of Chinese Medicine, Jiangsu Province Hospital of Chinese Medicine, the  
19 7 Affiliated Hospital of Nanjing University of Chinese Medicine, Nanjing, China.  
20  
21

22 8 <sup>2</sup> Department of Hematology, Jiangsu Province Hospital of Chinese Medicine, the Affiliated  
23 9 Hospital of Nanjing University of Chinese Medicine, Nanjing, China.  
24  
25

26 10 <sup>3</sup> Department of Colorectal Surgery, Jiangsu Province Hospital of Chinese Medicine, the  
27 11 Affiliated Hospital of Nanjing University of Chinese Medicine, Nanjing, China.  
28  
29

30 12 <sup>4</sup> School of Atmospheric Sciences, Nanjing University, Nanjing, China  
31  
32

33  
34 13 \*Correspondence to: Xuejun Zhu, zhuxuejun@njucm.edu.cn.  
35  
36

37 14  
38 15 **Abstract**  
39  
40

41  
42 16 **OBJECTIVES:** This study aims to investigate the relationship between daily weather and  
43 17 transmission rate of SARS-CoV-2, and to develop a generalized model for future prediction of  
44 18 the COVID-19 spreading rate for a certain area with meteorological factors.  
45  
46  
47

48 19 **DESIGN:** A retrospective, qualitative study.  
49  
50

51  
52 20 **METHODS AND ANALYSIS:** We collected 382,596 records of weather data with four  
53 21 meteorological factors, i.e., average temperature, relative humidity, wind speed, and visibility,  
54  
55  
56  
57

1  
2  
3 22 and 15,192 records of epidemic data with daily new confirmed case counts (1,587,209 confirmed  
4  
5 23 cases in total) in nearly 500 areas worldwide from January 20 to April 9 in 2020. Epidemic data  
6  
7  
8 24 were modeled against weather data to find a model that could best predict the future outbreak.  
9

10  
11 25 **RESULTS:** Significant correlations of the daily new confirmed case counts with the weather 3~7  
12  
13 26 days ago were found. SARS-CoV-2 is easy to spread under weather conditions of average  
14  
15 27 temperature at 5~15 °C, relative humidity at 70%~80%, wind speed at 1.5~4.5 meter / second,  
16  
17  
18 28 and visibility less than 10 statute miles. A short-term model with these four meteorological  
19  
20 29 variables in the past 3~7 days was derived to predict the daily increase in COVID-19; and a long-  
21  
22 30 term model using temperature to predict the pandemic in the next week or month was derived.  
23  
24  
25 31 Taken China as a discovery dataset, it was well validated with worldwide data. According to this  
26  
27 32 model, there are five viral transmission patterns, "restricted", "controlled", "natural", "tropical",  
28  
29 33 "southern". This model's prediction performance correlates with actual observations best (over  
30  
31  
32 34 0.9 correlation coefficient) under natural spread mode of SARS-CoV-2 when there is not much  
33  
34 35 human interference by epidemic prevention measures.  
35

36  
37 36 **CONCLUSIONS:** This model can be used for prediction of the future outbreak, and illustrating  
38  
39 37 the effect of epidemic control for a certain area.  
40

41  
42 38 **Keywords:** COVID-19, SARS-CoV-2, weather, temperature, prediction model, epidemic control  
43  
44  
45 39  
46

#### 47 40 **Strengths and limitations of this study**

- 48  
49  
50 41 ● This study investigates the role of daily weather in COVID-19 spread systematically with a  
51  
52 42 comprehensive set of four meteorological factors.  
53  
54  
55  
56  
57  
58  
59  
60

- 1  
2  
3 43 ● This research collected a huge amount of data, covering nearly 500 areas worldwide in a long  
4  
5 44 timescale.  
6  
7  
8 45 ● The current study proposes mathematical models integrating meteorological information for  
9  
10 46 predicting COVID-19 case counts in the future.  
11  
12  
13 47 ● The influence of weather on virus spread could be confounded by a dozen of manual  
14  
15 48 interventions, such as population mobility and disinfection measures, leading to inaccurate  
16  
17 modeling.  
18 49  
19  
20  
21 50 ● The prediction model (especially the long-term model) might be unsuitable and inaccurate  
22  
23 51 for areas with hot weather.  
24  
25  
26  
27  
28  
29  
30  
31  
32  
33  
34  
35  
36  
37  
38  
39  
40  
41  
42  
43  
44  
45  
46  
47  
48  
49  
50  
51

## Introduction

The COVID-19 pandemic caused by SARS-CoV-2 has spread all over the world and has unprecedented great social and economic impact worldwide[1,2]. It exhibits high human-to-human transmissibility compared to other coronavirus like SARS[3]. It would be crucial to predict the future trend of COVID-19 outbreak ahead, in order to make proper prevention and control strategies accordingly in time.

Besides population mobility and human-to-human contact, meteorological conditions have been suggested to be involved in the transmission of droplet-mediated viral diseases[4,5]. As droplets carrying the coronavirus can travel in gaseous clouds as far as eight metres and stay suspended in the air for hours[5], the suspending time and viability of the coronavirus outside body would be largely affected by the environment. Wind speed could affect the suspending time of droplets, while visibility and humidity reflect the amount of particles in the air, determining the coronavirus payload. Temperature affects virus's viability in the environment. As SARS-CoV-2 is enveloped, it might be more vulnerable to adverse conditions like high temperature.

The impact of weather on epidemiology has been mentioned in human's history. The ancient Chinese had a theory called “Five Movement and Six Weather” to study climate change and its relationship with human health. Currently, there are a few studies on preprint servers discussing the relationship of temperature and humidity with the pandemic, but none is systematical investigation or proposes validated practical model for prediction[6–10].

Herein, this study intends to investigate the relationship between meteorological factors and epidemic transmission rate on a world scale. Four meteorological variables, i.e., average temperature, relative humidity, wind speed, and visibility, were collected as well as the confirmed case counts daily for 81 days from January 20, 2020 to April 9, 2020 for nearly 500 areas around

1  
2  
3 75 the world, including over 400 Chinese cities and areas, 18 Italian provinces, and 13 other  
4  
5 76 countries. Five time point's delay of virus infection from exposure were considered and compared  
6  
7  
8 77 to determine the most reasonable time point's delay. A multivariate polynomial regression model  
9  
10 78 with meteorological factors as a "weather coefficient" of the existing confirmed case count was  
11  
12 79 established in a discovery Chinese dataset, and then validated by worldwide data. Five  
13  
14 80 transmission modes, indicating different levels of epidemic control, were revealed by this model.  
15  
16  
17 81 In this view, this model can not only predict future outbreak, but also be used to evaluate the  
18  
19 82 effect of epidemic prevention measures for a certain area.  
20  
21

## 22 83 **Materials and Methods**

### 23 24 25 84 Epidemiological data

26  
27 85 Epidemiological data were collected from the World Health Organization (WHO)[11],  
28  
29  
30 86 European Centre for Disease Control and Prevention, and DXY-COVID-19-Data[12]. The daily  
31  
32 87 new confirmed case counts were collected from January 20, 2020 to April 9, 2020. Incidence data  
33  
34 88 were obtained for 428 Chinese cities and districts, 18 Italian provinces, and 13 other countries,  
35  
36  
37 89 namely, United States, United Kingdom, Germany, France, Spain, Iran, Korea, Japan, Australia,  
38  
39 90 South Africa, India, Thailand, and Singapore. Considering the potential confounding effect, only  
40  
41 91 Chinese cities with no less than 50 cumulative confirmed cases in one month and without official  
42  
43  
44 92 reports of large imported cases (42 cities in total) were taken as a discovery dataset, while those  
45  
46 93 for Italian provinces and all the other nations were taken as replication datasets (Supplementary  
47  
48 94 Materials).

### 49 50 95 Weather data

51  
52  
53 96 Four meteorological variables were chosen, air temperature, relative humidity, wind speed,  
54  
55 97 and visibility. Temperature could affect virus viability in the environment. Wind speed could  
56  
57  
58  
59



1  
2  
3 98 affect the suspending time of virus-attached particles. Relative humidity reflects the amount of  
4  
5 99 droplets in the air. Visibility is influenced by the amount of particles such as dust and air  
6  
7  
8 100 pollutants. These two parameters both affect the amount of mediator for the virus to stay in the  
9  
10 101 air. Therefore, temperature, dew point, wind speed, and visibility were collected, and relative  
11  
12 102 humidity was calculated accordingly (Supplementary Materials). We obtained hourly values of  
13  
14  
15 103 meteorological observations and geographic factors (latitude and elevation) from the Integrated  
16  
17 104 Surface Database of USA National Centers for Environmental Information[13]. Daily data were  
18  
19 105 calculated by averaging the hourly data for each variable in each day.  
20  
21

### 22 106 Statistical modeling

23  
24 107 The number of daily new confirmed cases was taken as a dependent variable. Four  
25  
26  
27 108 meteorological variables, namely, average temperature, wind speed, visibility, and relative  
28  
29 109 humidity, and the existing confirmed case counts were taken as independent variables.  
30  
31 110 Considering that there is a latency stage from the day one get infected to the day being  
32  
33  
34 111 confirmed, a time delay of the day COVID-19 was confirmed from the day weather data were  
35  
36 112 collected needs to be taken into consideration. As it is reported that the latency period for  
37  
38 113 COVID-19 is 3~7 days on average and 14 days at most, five time points delay of virus infection  
39  
40  
41 114 were taken into consideration, that is, weather data and existing confirmed cases count data were  
42  
43 115 collected on the day, three days before, seven days before, 3~7 days before, and 14 days before  
44  
45 116 collecting the new confirmed case count data.  
46

47 117 To investigate whether the influence of meteorological factors is linear or quadric, both  
48  
49  
50 118 linear and non-linear modeling were performed under different relationship assumptions to  
51  
52 119 compare model fitness statistics. Each meteorological variable was fitted into a bunch of single-  
53  
54 120 factor models (either generalized linear model or polynomial model) through non-linear least  
55  
56  
57  
58  
59  
60

1  
2  
3 121 squares (NLS) modeling using the Wuhan dataset with a 3~7 days delay of infection. The  
4  
5 122 relationship between each meteorological variable and confirmed new case count (linear or  
6  
7  
8 123 quadric) was identified based on model fitness (log-likelihood, Akaike information criterion,  
9  
10 124 Bayesian Information Criterion, etc.) and common knowledge of droplet-mediated viral diseases.  
11

12 125 Second, the proper time delay from weather exposure to COVID-19 confirmation was  
13  
14 investigated in the Wuhan dataset through Loess regression interpolation and NLS modeling with  
15 126  
16  
17 127 the previously identified relationship for each meteorological variable. The most possible time  
18  
19 128 delay identified was taken for subsequent analyses.  
20

21  
22 129 To investigate the degree of contribution for each meteorological factor to the COVID-19  
23  
24 130 case counts, Spearman's correlation test (a non-parametric method that measures the strength and  
25  
26 131 direction of associations) was first adopted, with the Wuhan dataset under the assumption of  
27  
28 132 previously defined time delay. Nevertheless, here we assumed monotonic correlations between  
29  
30  
31 133 COVID-19 case count and meteorological variables, while we could not exclude the possibility  
32  
33 134 that the real relationship was not monotonic, which might impede the accuracy of correlation  
34  
35 135 analysis. Then, we performed single-factor NLS regression modeling for each meteorological  
36  
37  
38 136 variable in the discovery dataset under the assumption of previously determined relationship and  
39  
40 137 pre-defined time delay, to determine the exact coefficients accompanied with each  
41  
42 138 meteorological factor and to find out the most suitable environmental condition for SARS-CoV-2.  
43

44  
45 139 Then, two final prediction models (short-term model and long-term model) were developed  
46  
47 140 using the discovery dataset with the previously determined coefficients. The prediction model  
48  
49 141 supposed that all the meteorological variables, with their specific coefficients determined by  
50  
51 142 single-factor modeling, were added together to compose a weather coefficient. The new  
52  
53  
54 143 confirmed case count on the test day is calculated by multiplying the weather coefficient with the  
55  
56 144 existing confirmed case count on the exposure day (the time delay between test day and exposure  
57  
58  
59  
60

1  
2  
3 145 day is determined in previous analysis), and then multiply by a constant coefficient. The short-  
4  
5  
6 146 term model took all four variables, while the long-term model only considered temperature as it  
7  
8 147 is easy to be forecasted. There was a constant coefficient for the total equation, that was  
9  
10 148 multiplied by the existing confirmed case count. Its exact value was determined by model fitting  
11  
12 149 in the discovery dataset. The influence of geographic factors, i.e., latitude and elevation, was  
13  
14  
15 150 investigated with all datasets covering the world's top cities and areas. The correlation of existing  
16  
17 151 confirmed case counts with newly confirmed case counts was also investigated. Basic statistics  
18  
19 152 and modeling was conducted in R 3.5.1 (<https://cran.r-project.org/>).  
20

### 21 22 153 Model validation and application

23  
24 154 The best fitted model was validated in the replication datasets (Italian city-level data and  
25  
26 155 other nation-level data) by correlating the observed actual epidemiological data with the  
27  
28 156 predicted values from the model in the datasets. We used these fitted models to calculate a  
29  
30  
31 157 predicted value for case counts for each studied site, and then compared this predicted value with  
32  
33 158 the real observed case counts by calculating a Spearman's correlation coefficient  $\rho$  between them.  
34

### 35 159 Patient and Public Involvement

36  
37  
38 160 No specific patients were included in the current study. Epidemiological data were  
39  
40 161 downloaded from online open-source databases. The public were not involved in the planning  
41  
42 162 and design of the study.  
43

## 44 45 163 **Results**

### 46 47 48 164 The Weather's influence on SARS-CoV-2 transmission displays 3~7 days time delay

49  
50 165 The ranges of average temperature, relative humidity, wind speed, and visibility in the replication  
51  
52 166 datasets were similar to those in the discovery dataset (see Supplementary Results for detailed  
53  
54  
55 167 datasets description). Non-linear modeling with Wuhan dataset under the assumption of 3~7 days  
56  
57  
58  
59  
60

1  
2  
3 168 delay of infection confirmation suggested that the effect of temperature and wind speed is better  
4  
5 depicted as quadric (Table S1), which was also supported by Loess regression interpolation (Fig.  
6 169  
7  
8 170 1). The mode for relative humidity and visibility was hard to be determined, as statistics  
9  
10 171 supported both relationships (Table S1). Considering the common knowledge of coronavirus  
11  
12 172 transmission and the trend showed by Loess regression interpolation, relative humidity exerted its  
13  
14 impact in a quadric trend while visibility exerted its impact in a linear trend (Fig. 1,  
15 173  
16  
17 174 Supplementary results).

18  
19  
20 175 Furthermore, investigation of the time delay effect in the Wuhan dataset showed that the number  
21  
22 176 of confirmed new cases was best correlated with air temperature 3~7 days ago, relative humidity  
23  
24 177 and visibility 7 days ago, and wind speed on the exposure day (Table S2). By comprehensive  
25  
26 consideration of all four meteorological variables and the differences between statistics values,  
27 178  
28  
29 179 the weather 3~7 days ago, as well as weather one week ago, could well predict COVID-19  
30  
31 180 outbreak. It coincided with the latency period of 3~7 days for SARS-CoV-2, that is, exposure  
32  
33 under certain adverse weather might exhibit its effect after 3~7 days.  
34 181  
35

### 36 182 Contribution of single meteorological factor to the outbreak

  
37  
38

39 183 In the Wuhan dataset, the new case count was significantly positively correlated with temperature  
40  
41 184 (Spearman's correlation  $\rho = 0.69$ ,  $p < 0.001$ ) and visibility ( $\rho = 0.43$ ,  $p = 0.04$ ), and negatively  
42  
43 correlated with wind speed ( $\rho = -0.45$ ,  $p = 0.03$ ) and relative humidity ( $\rho = -0.33$ ,  $p = 0.12$ ) 3~7  
44 185  
45 days ago. It suggested that temperature was correlated with the outbreak best, followed by wind  
46 186  
47 speed, visibility, and relative humidity. A model only with temperature as a parameter could  
48 187  
49 already explained 45% of the variance in the epidemic data ( $p = 4 \times 10^{-4}$ ), while wind speed and  
50  
51 188 visibility could explain over 25% of the variance. According to the fitted single-factor models  
52  
53 189 (temperature, relative humidity, and wind speed were fitted into quadratic models; and visibility  
54  
55 190  
56  
57  
58  
59  
60

1  
2  
3 191 was fitted into a linear model, see the Supplementary Results for details), SARS-CoV-2  
4  
5  
6 192 transmission reaches a peak when mean temperature is 6.18 °C (Fig. 2A), relative humidity is  
7  
8 193 78.47% (Fig. 2B), and wind speed is 1.88 meter /second (m/s) (Fig. 2C); and its transmission rate  
9  
10 194 decreases with the increase of visibility (Fig. 2D). The effects of geographic factors such as  
11  
12  
13 195 latitude and elevation, and the pure influence from the existing case count were further  
14  
15 196 investigated in the worldwide datasets (Fig. S1), illustrating that COVID-19 mainly outbreaks at  
16  
17 197 latitude 30°~50° (Fig. S1A) and elevation < 500 metre (Fig. S1B). New confirmed case count  
18  
19  
20 198 was positively correlated with the existing confirmed case count (Fig. S1C).

### 21 22 199 Short-term prediction model

23  
24  
25 200 We further derived a full model combined with all four meteorological variables and fitted this  
26  
27  
28 201 model with the discovery dataset (Supplementary Results). The best-fitted short-term model was  
29  
30 202 as follows:

31  
32  
33  
34 203 **New Case Count**

$$35 \quad = (-0.11 \times T^2 + 1.40 \times T - 0.058 \times RH^2 + 9.04 \times RH - 1.36 \times SPD^2 + 5.12 \\ 36 \quad \times SPD - 7.02 \times VSB - 126.66) \times \alpha \times \text{Existing Confirmed Case Count}$$

37  
38 204 where T is temperature in °C, RH is relative humidity in percentage (defined as over 15%), SPD  
39  
40 205 is wind speed in m/s, VSB is visibility in statute miles,  $\alpha$  is a site-specific constant, with a default  
41  
42  
43 206 of 0.001. All parameters take the means of values 3~7 days before the day new case count is  
44  
45 207 evaluated.

46  
47  
48 208 In this model, all the four meteorological variables are added together in their proper forms  
49  
50 209 to compose a "weather coefficient" (the equation in brackets), which affects the transmission rate  
51  
52 210 of SARS-CoV-2, and thus influences the number of people that catch infection from the existing  
53  
54  
55 211 confirmed cases, which then determines the new confirmed case count 3~7 days later. There is a

1  
2  
3 212 multiplicative constant coefficient  $\alpha$  in the equation, which seems site-related. This constant  
4  
5 213 coefficient could adjust the strength of the "weather coefficient" on disease transmission. When  
6  
7  
8 214 we substitute replication datasets into this short-term model with the multiplicative constant  
9  
10 215 coefficient  $\alpha$  originally determined by the discovery dataset (which was 0.00048), an obvious  
11  
12 216 underestimation of predicted values against real ones was observed although the predicted values  
13  
14  
15 217 correlated with the real ones very well. We supposed it was due to site-specific difference in the  
16  
17 218 multiplicative constant coefficient  $\alpha$  since the discovery dataset was all Chinese areas where the  
18  
19 219 pandemic had been controlled early. Thus, we further re-fitted this composed model with all  
20  
21  
22 220 datasets to determine a more accurate value of the multiplicative constant coefficient  $\alpha$ , which  
23  
24 221 was 0.001 then. In practical application, we need to first plot the observed case count vs.  
25  
26 222 predicted one with a default  $\alpha$  value 0.001, and then examine the extent of underestimation or  
27  
28  
29 223 overestimation, to finally determine a proper multiplicative constant coefficient  $\alpha$  to adjust the  
30  
31 224 impact size of "weather coefficient" for a certain site.

32  
33 225 Substitute data from the past two months, a good prediction performance was obtained for  
34  
35 226 this short-term model, with the predicted values significantly correlated to the observed ones for  
36  
37  
38 227 most areas (Fig. 3). However, only the existing confirmed case count data could not predict the  
39  
40 228 new case count 3~7 days later as well as the weather-combined model did (Table S3).

#### 41 42 229 Different modes of viral transmission illustrated by the model

43  
44  
45 230 The observed versus predicted data exhibited different correlation patterns for different areas,  
46  
47 231 meaning different viral transmission modes, which may indicate the effect of epidemic control  
48  
49 232 for certain area.

50  
51 233 Data from Chinese top-affected cities were not very well predicted and obviously  
52  
53  
54 234 overestimated by this model with the default multiplicative constant coefficient  $\alpha$  ( $\rho = 0.11$ ,  $p <$   
55  
56 235  $0.001$ ; Fig. 3A). It might be due to the reason that most Chinese cities took actions quickly after  
57

1  
2  
3 236 the outbreak in Wuhan was reported, thus, these cities were under strict epidemic prevention  
4  
5 237 measures at the beginning of the pandemic. This viral transmission mode suggested by the not  
6  
7  
8 238 well correlated prediction pattern is called "restricted".  
9

10 239 For Wuhan city and some early outbreak countries (Japan, Korea, Iran, and Italy), the  
11  
12 240 predicted outbreak was well correlated with the actual observations at the beginning when the  
13  
14  
15 241 existing confirmed cases were not in very large numbers, but the prediction deviates from the  
16  
17 242 observation as the confirmed cases increase, in detail, there's large overestimation of prediction  
18  
19 243 ( $\rho_{\text{Wuhan}} = 0.69$ ,  $\rho_{\text{Italy}} = 0.87$ ,  $\rho_{\text{Japan}} = 0.80$ ,  $\rho_{\text{Iran}} = 0.86$ ,  $p < 0.001$ ,  $\rho_{\text{Korea}} = 0.43$ ,  $p = 0.002$ ; Fig. 3B).  
20  
21 It is of notice that the dramatic deviation of predictions for Wuhan occurred after February 15,  
22 244  
23  
24 245 the day when shelter hospitals had been put into use for seven days (the average latency period  
25  
26 246 for COVID-19). Therefore, the deviated prediction pattern indicates that the outbreak prevention  
27  
28 247 and control taken in these areas is effective (so-called "controlled" mode). The number of cases  
29  
30  
31 248 had been decreased by 72% for Wuhan, over 95% for Korea, Japan, and Italy, and 37% for Iran  
32  
33 249 at most due to epidemic control (the largest gap between prediction and observation).  
34

35 250 For most European and American countries, the predicted outbreak was linear correlated  
36  
37  
38 251 with the observed data very well ( $\rho_{\text{France}} = 0.96$ ,  $\rho_{\text{United States}} = 0.93$ ,  $\rho_{\text{United Kingdom}} = 0.83$ ,  $\rho_{\text{Spain}} =$   
39  
40 252  $0.97$ ,  $\rho_{\text{Germany}} = 0.94$ ,  $p < 0.001$ ; Fig. 3C), suggesting a natural viral transmission mode without  
41  
42 253 much man-made epidemic prevention and control measures. Estimation of daily new case counts  
43  
44  
45 254 by this short-term model performed very well for European countries, while this model  
46  
47 255 underestimated the outbreak in the United States.  
48

49 256 Although the weather is not suitable for tropical areas, the viral transmitted in natural mode,  
50  
51  
52 257 manifested as good linear correlation between the prediction and the observation ( $\rho_{\text{India}} = 0.94$ ,  
53  
54 258  $\rho_{\text{Singapore}} = 0.66$ ,  $p < 0.001$ ,  $\rho_{\text{Thailand}} = 0.56$ ,  $p = 0.001$ ; Fig. 3D), with just relatively small daily  
55  
56 259 new case counts compared to temperate regions.  
57  
58  
59  
60

1  
2  
3 260 Countries in the southern hemisphere displayed similar pattern as the "controlled" with large  
4  
5  
6 261 overestimation by the model when the confirmed cases increase, leading to not good prediction  
7  
8 262 performance ( $\rho_{\text{Australia}} = 0.79$ ,  $p < 0.001$ ,  $\rho_{\text{South Africa}} = 0.34$ ,  $p = 0.08$ ; Fig. 3E). It might be due to  
9  
10 263 the effect of epidemic prevention measures and hot summer weather in these countries.

### 11 12 264 Long-term simplified model

13  
14  
15 265 Long-term prediction depends on weather forecast, which generally reports only average  
16  
17  
18 266 temperature. As temperature 14 days ago could predict COVID-19 outbreak as well as  
19  
20 267 temperature in a short time delay (3~7 days ago), we again performed single-factor regression  
21  
22 268 modeling in the discovery dataset, taking temperature 14 days ago as an input, assuming a  
23  
24 269 quadric function (Supplementary Results). This simplified model with average temperature as a  
25  
26  
27 270 weather factor was derived as follows:

$$28$$
$$29$$
$$30$$
$$31$$
$$\text{new case count} = (-0.10 \times T^2 + 1.11 \times T + 46.42) \times \beta \times \text{Existing Confirmed Case Count}$$

32  
33 272 where T is temperature in °C,  $\beta$  is a site-related multiplicative constant coefficient, with a default  
34  
35 273 of 0.006. All parameters take values 14 days before the day new case count is evaluated.

36  
37  
38 274 With the model, the prediction performance was still good ( $\rho = 0.66$  in the replication datasets,  $p$   
39  
40 275  $< 0.001$ ; Fig. 3F). The long-term simplified prediction model also showed five prediction-  
41  
42 276 observation correlation patterns (Fig. 3F), indicating different modes of viral transmission, for the  
43  
44  
45 277 studied areas. This model could directly predict the newly emerging cases 14 days later, and be  
46  
47 278 used to predict COVID-19 outbreak in the future month by summing up the daily new case count  
48  
49 279 and combining weather forecast (usually available for the future 15 days).

## 50 51 52 280 **Discussion**



1  
2  
3 281 This research discovers nonlinear dose-response relationship for meteorological factors, in  
4  
5 282 consistency with previous studies[7]. Predictions of COVID-19 outbreak scale by the models  
6  
7  
8 283 were well correlated with the observations around the world, suggesting the importance of  
9  
10 284 weather in SARS-CoV-2 transmission. Previous studies have implied the spread of many  
11  
12 285 respiratory infectious diseases, such as influenza, is dependent upon temperature and relative  
13  
14  
15 286 humidity[4]. Recent published papers on preprint servers have reported roles of temperature and  
16  
17 287 absolute humidity in the COVID-19 transmission, but their conclusions are diverse[6–10]. In  
18  
19 288 contrast to the findings by Cai et al[10], this study suggests significant impact of mean  
20  
21  
22 289 temperature on the daily new case count, indicating a need for sufficient time delay between  
23  
24 290 exposure and confirmation for weather to exhibit its effect. In contrary to other two studies[6,7],  
25  
26 291 this research suggests that there is a relatively not wide temperature and humidity ranges for the  
27  
28  
29 292 pandemic. There is an optimal temperature for SARS-CoV-2 at 6.18 °C, which is colder than that  
30  
31 293 suggested by Bu et al[9] but in consistency with the estimation by Wang et al[7]; and most areas  
32  
33 294 with large spread locate in the humidity range of 60% ~ 90%, more humid than Bu et al  
34  
35 295 suggested[9]. It is of notice that different from other viral respiratory diseases such as  
36  
37  
38 296 influenza[14,15], high relative humidity is better for SARS-CoV-2 to spread, suggesting that a  
39  
40 297 sufficient amount of droplets in the air to support the suspension of SARS-CoV-2 is more  
41  
42 298 important for the spread than the effect of dry air on the human immune system. Different from  
43  
44  
45 299 other studies[16], this study also finds significant involvement of wind speed, in a quadric  
46  
47 300 manner, indicating that mild wind might be more suitable for the virus to suspend in the air. In  
48  
49 301 addition, the current study discovered that visibility was significantly negatively correlated with  
50  
51  
52 302 new case count and played a more important role in viral spread than humidity did (from  
53  
54 303 spearman's correlation coefficient comparison). As visibility reflects the amount of particles (e.g.,  
55  
56 304 dust and air pollutants) in the air while humidity reflects the amount of water in the air, it may

1  
2  
3 305 indicates that SARS-CoV-2 is more likely to cling to solid particles than droplets. New case  
4  
5 306 count decreases rapidly when visibility is high than 13 statute miles, indicating that caution  
6  
7  
8 307 should be taken if visibility drops below 10 statute miles.  
9

10  
11 308 In the prediction model, there is a multiplicative constant coefficient which determines the  
12  
13 309 strength of the weather coefficient on the epidemic transmission. It seems site-specific, as  
14  
15 310 adjusting it could make the prediction for one site very close to the observation. This constant  
16  
17 311 might reflect the influence of a couple of site-specific confounding factors, such as epidemic  
18  
19  
20 312 control measures, sun radiation, and population density. Various degrees of isolation for various  
21  
22 313 areas around the world lead to different degrees of weather effect. When evaluate the prediction  
23  
24 314 performance by the short-term model and the long-term model, they both exhibit different  
25  
26  
27 315 prediction-observation correlation patterns (Fig. 3), suggesting that changes in the degree of  
28  
29 316 epidemic control and isolation policy would lead to deviation from the original prediction and  
30  
31 317 thus different prediction-observation correlation patterns. Therefore, by plotting the predicted  
32  
33 318 versus observed new case counts and adjusting the multiplicative constant coefficient ( $\alpha$  and  $\beta$ ), it  
34  
35  
36 319 would be easy to evaluate the effect of epidemic prevention measures. It is of notice that the  
37  
38 320 observed case counts dropped dramatically from the predictions for Wuhan seven days after their  
39  
40 321 shelter hospitals were put in use, suggesting the importance and necessity of building shelter  
41  
42  
43 322 hospitals for strict isolation rather than just home isolation. With the use of shelter hospitals and  
44  
45 323 very strict isolation measures, the outbreak in one area could be reduced by 52~99% compared to  
46  
47 324 natural transmission mode. Another thing worth attention is that although the weather in tropical  
48  
49  
50 325 areas like India is not suitable for viral survival and transmission, SARS-CoV-2 still keeps on  
51  
52 326 spreading in a linear fashion in these areas, with just low growth rate of the outbreak. Therefore,  
53  
54 327 these tropical areas should still be on the alert against future outbreak of COVID-19.  
55  
56  
57  
58  
59  
60

1  
2  
3 328 Although those cases with travel history to China or indicated by the World Health Organization  
4  
5 329 as "imported case only" were excluded in this study to make the world data most likely local  
6  
7  
8 330 transmitted, it was difficult to separate the imported cases from local transmission very well in  
9  
10 331 practice. It might explain the not excellent correlations of predictions with observations.  
11  
12 332 Furthermore, the relationship of weather and COVID-19 could be complex, since the human  
13  
14  
15 333 immune system has an innate seasonal rhythm, and the immune system could also be affected by  
16  
17 334 weather *vice versa*. For example, dry air would reduce the amount of mucus on the airway  
18  
19 335 mucosa, and thus increase the probability of viral invasion, while wet air would provide droplets  
20  
21  
22 336 for virus to adhere.

23  
24 337 There are several limitations of this study. First of all, this prediction model (especially the long-  
25  
26  
27 338 term model) might be more suitable and accurate for temporal areas in spring, autumn, and winter,  
28  
29 339 as the models were derived using Chinese datasets, mainly in the first three months of 2020. The  
30  
31 340 prediction became inaccurate and even improper under hot weather (i.e., the predicted values of  
32  
33  
34 341 long-term model become negative when air temperature is higher than 28 °C ), which might  
35  
36 342 explain the obvious bad prediction performance for countries in the southern hemisphere and  
37  
38  
39 343 tropical areas. One explanation for the inaccurate prediction in areas with high temperature could  
40  
41 344 be that SARS-CoV-2 transmission in these areas was mainly not influenced by weather, but in  
42  
43 345 another direct transmission way, such as face-to-face contact or spread in gathering crowd.  
44  
45 346 Second, it seems that the prediction performance drops with the increase in new case count,  
46  
47  
48 347 suggesting that the prediction model might become inaccurate and not suitable for very large new  
49  
50 348 case count. This could be due to (1) the influence of weather on COVID-19 spread might weaken  
51  
52 349 when the number of cases increases, while other factors such as social distance become more  
53  
54  
55 350 important at a later stage; (2) there was less data points with large new case count, which might

1  
2  
3 351 lead to larger variance. Third, the short-term prediction model must use all four meteorological  
4  
5 352 factors, while these factors are not always available for any one certain area. Fourth, this study  
6  
7  
8 353 included various areas covering a long period into modeling, thus, there were a bunch of variable  
9  
10 354 confounding factors, such as population mobility and disinfection measures, which were not  
11  
12 355 controlled and thus could impede the model accuracy. Fifth, as we could only obtain country-  
13  
14  
15 356 level epidemiological data, the corresponding meteorological data were obtained for their capital  
16  
17 357 cities, leading to not exact pairing of epidemiological data and meteorological data. Sixth, there is  
18  
19 358 a general lack of data and cases in the current study, since we only collected data covering two  
20  
21  
22 359 and a half months while the pandemic has persisted over seven months up to now.

## 23 24 25 360 **Conclusion**

26  
27  
28 361 In summary, this study has found significant correlations with the COVID-19 epidemic trend for  
29  
30 362 not only temperature and humidity, but also wind speed and visibility. It proposed a  
31  
32 363 comprehensive model for prediction of COVID-19 outbreak, composed of a short-term version  
33  
34  
35 364 and a long-term version. The short-term version uses the combination of four meteorological  
36  
37 365 factors as a "weather coefficient" of the existing confirmed case count in the past week and can  
38  
39 366 be used to predict epidemic situation in the future three days; the short-term version uses average  
40  
41  
42 367 temperature as the "weather coefficient" seven days ago and can predict the outbreak in one  
43  
44 368 month if combined with weather forecast. This model is easy to use for predicting the COVID-19  
45  
46 369 outbreak, by substituting weather data in the recent past week and obtaining an estimate of case  
47  
48 370 count for the future couple of days or month. This model will be very helpful for local  
49  
50  
51 371 governments to make timely policies on epidemic control, for instance, the allocation of medical  
52  
53 372 equipments such as ventilators and medical resources such as hospitals, beds and health-care  
54  
55 373 workers, according to the prediction results.

1  
2  
3 374  
4  
5  
6 375  
7  
8 376  
9  
10  
11 377  
12  
13 378  
14  
15  
16 379  
17  
18 380  
19  
20 381  
21  
22  
23 382  
24  
25 383  
26  
27  
28 384  
29  
30 385  
31  
32  
33 386  
34  
35  
36 387  
37  
38 388  
39  
40 389  
41  
42  
43 390  
44  
45  
46 391  
47  
48  
49 392  
50  
51 393  
52  
53  
54 394  
55  
56 395  
57  
58  
59  
60

**Acknowledgments:** We thank Dr. Zhisheng Huang for advices on data collecting and processing, Dr. Siyuan Tan for technical support on analysis, Dr. Yonggao Chen for mathematical support on modeling, Dr. Zhongfa Yang for advices on manuscript revision.

**Funding:** the Priority Academic Program Development of Jiangsu Higher Education Institutions – the third period (NO.035062002003c), the National Natural Science Foundation of China (NO. 82001206), the Yizhong Research Fund of Jiangsu Provincial Hospital of Chinese Medicine (Y19066).

**Author contributions:** BC, YZ and XZ design and interpret the reported analyses and results; HL, XY, YH, BZ, and MX participated in the acquisition of data; BC analyse the data, drafted, and revised the manuscript; HL and XZ revised the manuscript; YZ and FT provided technical support; XZ supervised the research and revised the manuscript.

**Competing interests:** Authors declare no competing interests.

**Data and materials availability:** Weather data and epidemiological data is all obtained from public databases. Detailed modeling results are available upon request by emailing to Biqing Chen, bq\_chen@qq.com.

## References:

- 1 Zhu N, Zhang D, Wang W, *et al.* A novel coronavirus from patients with pneumonia in China, 2019. *N Engl J Med* 2020;**382**:727–33. doi:10.1056/NEJMoa2001017
- 2 Dewey C, Hingle S, Goelz E, *et al.* I DEAS AND O PINIONS Supporting Clinicians During the COVID-19 Pandemic. 2020;**2019**:2019–21. doi:10.7326/M19

- 1  
2  
3 396 3 Chan JFW, Yuan S, Kok KH, *et al.* A familial cluster of pneumonia associated with the  
4  
5 397 2019 novel coronavirus indicating person-to-person transmission: a study of a family  
6  
7 cluster. *Lancet* 2020;**395**:514–23. doi:10.1016/S0140-6736(20)30154-9  
8 398  
9  
10  
11 399 4 Lowen AC, Mubareka S, Steel J, *et al.* Influenza virus transmission is dependent on  
12  
13 400 relative humidity and temperature. *PLoS Pathol* 2007;**3**:e151.  
14  
15  
16 401 5 Bourouiba L. Turbulent Gas Clouds and Respiratory Pathogen Emissions Potential  
17  
18 402 Implications for Reducing Transmission of COVID-19. *JAMA* 2020;:E1–2.  
19  
20 403 doi:10.1001/jama.2020.4756  
21  
22  
23 404 6 Proverbio AM, Crotti N, Manfredi M, *et al.* Preliminary evidence that higher temperatures  
24  
25 405 are associated with lower incidence of COVID-19, for cases reported globally up to 29th  
26  
27 February 2020. *medRxiv* Published Online First: 2020.  
28 406  
29  
30 407 doi:https://doi.org/10.1101/2020.03.18.20036731  
31  
32  
33 408 7 Wang M, Jiang A, Gong L, *et al.* Temperature Significantly Change COVID-19  
34  
35 409 Transmission in 429 cities. *Block Caving – A Viable Altern* Published Online First: 2020.  
36  
37 410 doi:https://doi.org/10.1101/2020.02.22.20025791.  
38  
39  
40 411 8 Luo W, Majumder MS, Liu D, *et al.* The role of absolute humidity on transmission rates of  
41  
42 412 the COVID-19 outbreak. *medRxiv* 2020;:2020.02.12.20022467.  
43  
44  
45 413 doi:10.1101/2020.02.12.20022467  
46  
47  
48 414 9 Bu J, Peng D-D, Xiao H, *et al.* Analysis of meteorological conditions and prediction of  
49  
50 415 epidemic trend of 2019-nCoV infection in 2020. *medRxiv* 2020;:2020.02.13.20022715.  
51  
52 416 doi:10.1101/2020.02.13.20022715  
53  
54  
55  
56  
57  
58  
59  
60

1  
2  
3  
4  
5  
6  
7  
8  
9  
10  
11  
12  
13  
14  
15  
16  
17  
18  
19  
20  
21  
22  
23  
24  
25  
26  
27  
28  
29  
30  
31  
32  
33  
34  
35  
36  
37  
38  
39  
40  
41  
42  
43  
44  
45  
46  
47  
48  
49  
50  
51  
52  
53  
54  
55  
56  
57  
58  
59  
60

- 10 Cai Y. The Effects of "Fangcang, Huoshenshan."  
<https://www.medrxiv.org/content/10.1101/2020.02.26.20028472v3>
- 11 Organization WH. <https://www.who.int/emergencies/diseases/novel-coronavirus-2019/situation-reports>. 2020. <https://www.who.int/emergencies/diseases/novel-coronavirus-2019/situation-reports> (accessed 29 Mar 2020).
- 12 <https://github.com/BlankerL/DXY-COVID-19-Data>.
- 13 <ftp://ftp.ncdc.noaa.gov/pub/data/noaa/2020/>. 2020.
- 14 Peci A, Winter AL, Li Y, *et al*. Effects of Absolute Humidity, Relative Humidity, Temperature, and Wind Speed on Influenza Activity in Toronto, Ontario, Canada. *Appl Env Microbiol* 2019;**85**:e02426-18. doi:10.1128/AEM.02426-18
- 15 Kudo E, Song E, Yockey LJ, *et al*. Low ambient humidity impairs barrier function and innate resistance against influenza infection. *Proc Natl Acad Sci U S A* 2019;**116**:10905–10.
- 16 Oliveiros B, Caramelo L, Ferreira NC, *et al*. Role of temperature and humidity in the modulation of the doubling time of COVID-19 cases. *medRxiv* Published Online First: 2020. doi:<https://doi.org/10.1101/2020.03.05.20031872>

## FIGURE LEGENDS

**Fig. 1.** Loess regression interpolation of confirmed new case count to the four meteorological variables, (A) average temperature (T) in °C, (B) relative humidity (RH) in %, (C) wind speed (SPD) in meter per second (m/s), (D) visibility (VSB) in statute miles, for Wuhan city. Five time

1  
2  
3 437 point's delay of confirmation from viral infection are displayed together in one figure, namely,  
4  
5 438 exposure on the day, three days before, seven days before, 3~7 days before, and 14 days before.  
6  
7

8  
9 439 **Fig. 2.** Scatterplots of confirmed new case counts to the four meteorological variables, (A)  
10  
11 440 average temperature (T) in °C, (B) relative humidity (RH) in %, (C) wind speed (SPD) in meter  
12  
13  
14 441 per second (m/s), (D) visibility (VSB) in statute miles, for all the studied datasets. Quadric  
15  
16 442 regression for T, RH, and SPD, and linear regression for VSB are illustrated for each dataset.  
17  
18 443 Interpolation curves with 95% confidence intervals are shown in shadow. The discovery dataset  
19  
20  
21 444 includes the major outbreak Chinese cities, while the replication datasets included provincial data  
22  
23 445 in Italy, and national data around the world(except China).  
24  
25

26 446 **Fig. 3.** The observed daily new case counts versus the predicted values by the short-term model  
27  
28  
29 447 (A-E) and the long-term model (F) are illustrated for all the studied areas. The plots exhibit five  
30  
31 448 prediction-observation correlation patterns, which indicates five viral transmission modes: (A)  
32  
33 449 the "restricted" pattern including the Chinese top affected cities excluding Wuhan; (B) the  
34  
35 450 "controlled" pattern including early outbreak areas, namely, Iran, Italy, Japan, and Korea, and  
36  
37  
38 451 Chinese Wuhan city; (C) the "natural" pattern including late outbreak European and American  
39  
40 452 countries, namely, France, Germany, Spain, United Kingdom, and United States; (D) the  
41  
42 453 "tropical" pattern including tropical countries India, Singapore, and Thailand; (E) the "southern"  
43  
44  
45 454 pattern including countries in the southern hemisphere, Australia and South Africa. Each dot  
46  
47 455 represents one day. Loess regression (A, B, E) and linear regression (C, D) interpolation curves  
48  
49 456 are illustrated for each dataset, with 95% confidence intervals showing in shadow. The black  
50  
51  
52 457 solid line represents that the observed values are equal to the predicted ones, and dots closer to  
53  
54 458 this line means better prediction performance.  
55  
56  
57  
58  
59



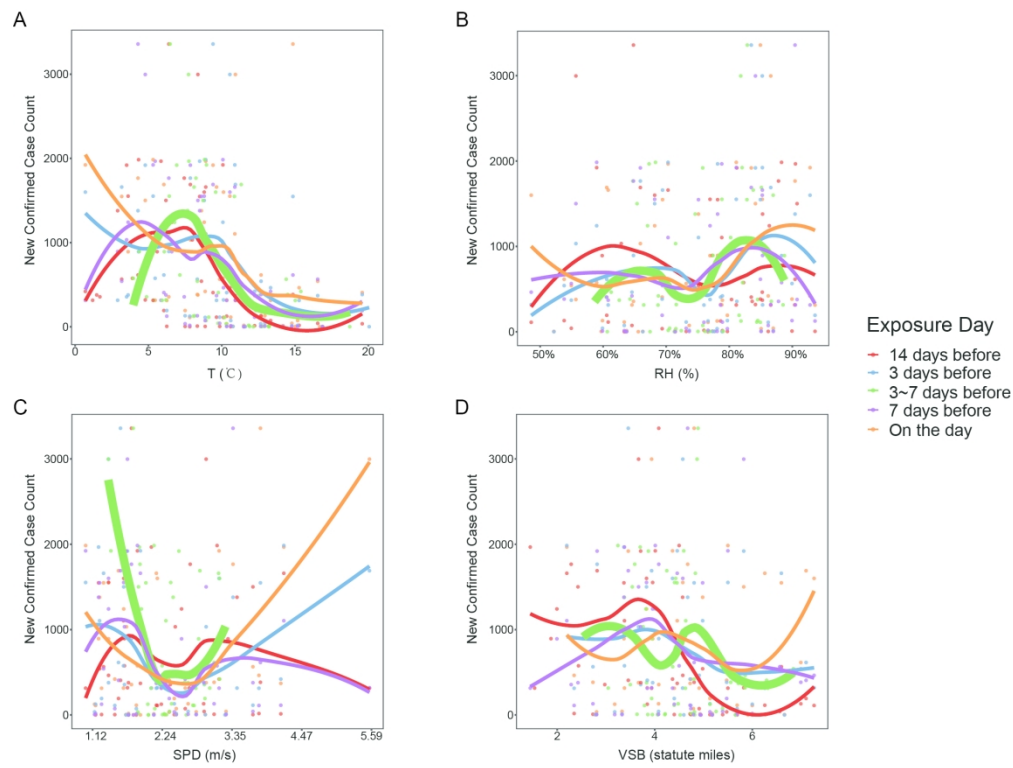

Fig. 1. Loess regression interpolation of confirmed new case count to the four meteorological variables, (A) average temperature (T) in °C, (B) relative humidity (RH) in %, (C) wind speed (SPD) in meter per second (m/s), (D) visibility (VSB) in statute miles, for Wuhan city. Five time point's delay of confirmation from viral infection are displayed together in one figure, namely, exposure on the day, three days before, seven days before, 3~7 days before, and 14 days before.

207x156mm (300 x 300 DPI)

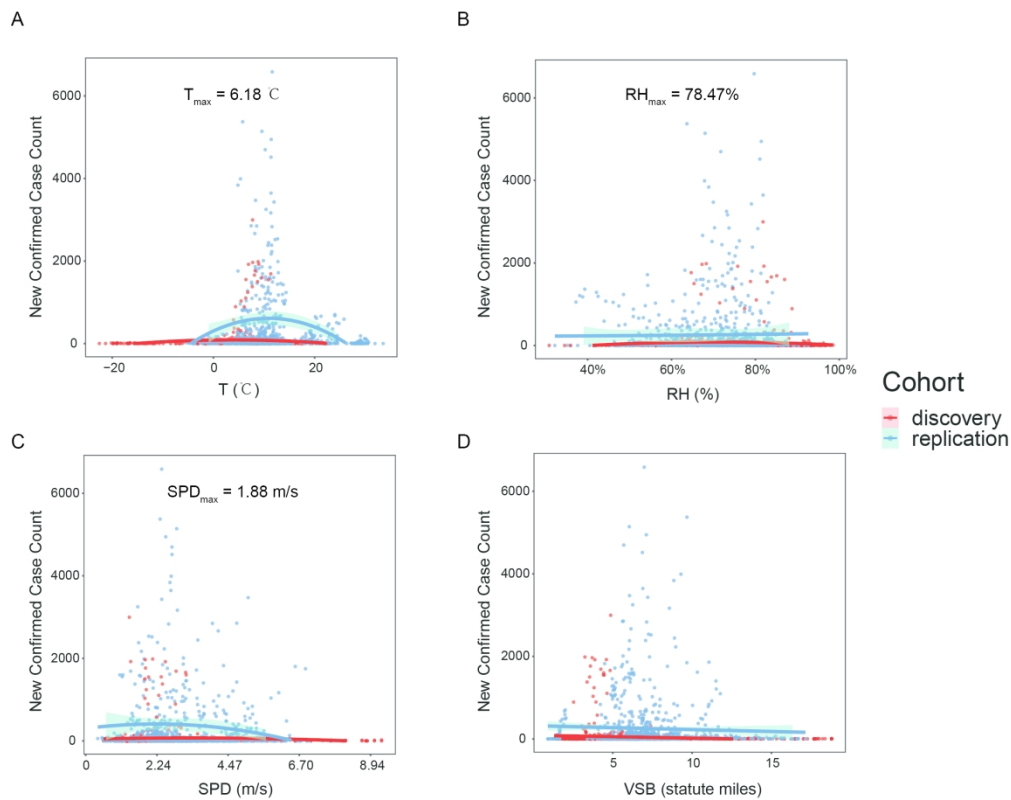

Fig. 2. Scatterplots of confirmed new case counts to the four meteorological variables, (A) average temperature (T) in °C, (B) relative humidity (RH) in %, (C) wind speed (SPD) in meter per second (m/s), (D) visibility (VSB) in statute miles, for all the studied datasets. Quadric regression for T, RH, and SPD, and linear regression for VSB are illustrated for each dataset. Interpolation curves with 95% confidence intervals are shown in shadow. The discovery dataset includes the major outbreak Chinese cities, while the replication datasets included provincial data in Italy, and national data around the world(except China).

218x172mm (300 x 300 DPI)



Fig. 3. The observed daily new case counts versus the predicted values by the short-term model (A-E) and the long-term model (F) are illustrated for all the studied areas. The plots exhibit five prediction-observation correlation patterns, which indicates five viral transmission modes: (A) the "restricted" pattern including the Chinese top affected cities excluding Wuhan; (B) the "controlled" pattern including early outbreak areas, namely, Iran, Italy, Japan, and Korea, and Chinese Wuhan city; (C) the "natural" pattern including late outbreak European and American countries, namely, France, Germany, Spain, United Kingdom, and United States; (D) the "tropical" pattern including tropical countries India, Singapore, and Thailand; (E) the "southern" pattern including countries in the southern hemisphere, Australia and South Africa. Each dot represents one day. Loess regression (A, B, E) and linear regression (C, D) interpolation curves are illustrated for each dataset, with 95% confidence intervals showing in shadow. The black solid line represents that the observed values are equal to the predicted ones, and dots closer to this line means better prediction performance.

209x244mm (300 x 300 DPI)

## 1 **Supplementary Materials and Methods**

### 2 Epidemiological data

3 We scrutinized WHO's situation reports to rule out these countries with only  
4 imported cases, and only collected the confirmed cases with possible or confirmed  
5 local transmission (i.e., without recent travel history to China).

6 For Wuhan city, there was a shortage of test kits at the beginning of the pandemic,  
7 which would make confirmed case counts much lower than the actual data, thus, we  
8 discarded epidemic data before January 28th, the day when domestic test kits have  
9 been approved, produced in large quantities, and were available for Wuhan hospitals.  
10 As there was a cut down problem for the existing confirmed case count on February  
11 20th for Wuhan, when modeling with the existing confirmed case count, only data  
12 before February 20th were used.

### 13 Weather data

14 Temperature and dew point displayed in Fahrenheit were transformed into  
15 Celsius forms, and relative humidity was calculated from temperature and dew point  
16 using the following formula for each time point:

$$RH = \begin{cases} e^{\frac{7.5D}{237.3+D} - \frac{7.5T}{237.3+T}} \times 100\%, & T < 0 \\ 10^{\frac{7.5D}{237.3+D} - \frac{7.5T}{237.3+T}} \times 100\%, & T \geq 0 \end{cases}$$

17 where RH is the relative humidity, D is the dew point in degrees Celsius, T is the  
18 temperature in degrees Celsius, and  $e$  is the base of the natural log.

19 For each city with epidemiological data, the meteorological station in that city or  
20 that was closest to the latitude and longitude coordinates of the city center was chosen.

1  
2  
3  
4 21 For a city with more than one meteorological stations, the one nearest to the city  
5  
6 22 center was chosen. For a province with epidemiological data, the meteorological  
7  
8  
9 23 station in the capital city of that province was chosen. For a country with only  
10  
11  
12 24 national wide epidemiological data, weather data were averaged across all the  
13  
14  
15 25 meteorological observatories in the cities where outbreak was officially reported.  
16  
17 26 Latitude and elevation for the meteorological observatories were also collected.

### 18 19 20 27 Statistical modeling

21  
22 28 Only one city Wuhan was chosen for illustrating the time delay effect because it  
23  
24  
25 29 is the first city to have an outbreak of COVID-19, there was none reported imported  
26  
27  
28 30 cases for Wuhan, which might obscure the correlation between weather and virus  
29  
30 31 transmission.

### 32 32 **Supplementary Results**

#### 33 33 Datasets description

34  
35 34 Only Chinese cities with monthly confirmed cases over 50 were included in the  
36  
37  
38 35 discovery dataset, which was 60 cities including Wuhan. The confirmed new cases in  
39  
40  
41 36 Wuhan on February 13, 2020, reached 13,436, which was oddly high as the daily  
42  
43  
44 37 confirmed new cases were no larger than 3,000 on all the other dates in Wuhan or in  
45  
46  
47 38 all the other Chinese cities. We suppose that it might be due to abrupt large  
48  
49  
50 39 supplement of virus test kits or data correction on that day. In order to reduce the  
51  
52  
53 40 potential contamination of modeling by this outlier, data on that day were discarded  
54  
55  
56 41 from the subsequent analysis. There were also two oddly large new confirmed case  
57  
58  
59 42 counts for Lombardy, which were discarded from the subsequent analysis. Except the  
60

1  
2  
3  
4 43 outliers, the daily confirmed new cases in the discovery dataset ranged from 1 to  
5  
6 44 2,997, the average temperature ranged  $-22.54^{\circ}\text{C} \sim 22.16^{\circ}\text{C}$ , the wind speed ranged  
7  
8  
9 45  $0.56 \sim 9.29$  meter per second, visibility ranged  $1.3 \sim 18.8$  statute miles, and relative  
10  
11  
12 46 humidity ranged  $30.84\% \sim 98.52\%$ .

#### 13 14 47 Model selection

15  
16  
17 48 With the increase of relative humidity, the amount of droplets in the air increases,  
18  
19 49 leading to more virus load. However, as the air gets humid, human's respiratory tract  
20  
21  
22 50 could better defend virus infection. Thus, the relationship of relative humidity could  
23  
24  
25 51 be complex, not pure linear. Giving comprehensive consideration, we defined the  
26  
27 52 effect of relative humidity to be quadric. As for visibility, it only affects the amount of  
28  
29  
30 53 particles in the air, which is positively correlated with virus load. Thus, it is most  
31  
32  
33 54 probably to exert its effect linearly.

34  
35 55 Although relative humidity and visibility 7 days ago correlated with the  
36  
37 56 confirmed new case counts best, there was not great loss of model fitting statistics for  
38  
39  
40 57 relative humidity and visibility 3~7 days ago, as compared to the loss between 7 days  
41  
42  
43 58 time delay and 3~7 days time delay for temperature.

#### 44 45 59 Fitted models

46  
47  
48 60 The fitted single-factor models were as follows:

$$49 \quad \text{New Case Count} = -0.11305 \times T^2 + 1.39819 \times T + 45.11405$$

50  
51  
52 61 where T is temperature in  $^{\circ}\text{C}$ .

53  
54  
55 62 The estimate p-value for constant was  $< 0.001$ . The extremum was  $-1.39819/$   
56  
57  
58 63  $(2 \times (-0.11305)) = 6.183945 \text{ }^{\circ}\text{C}$ .

$$\text{New Case Count} = -0.05759 \times \text{RH}^2 + 9.038 \times \text{RH} - 303.0$$

64 where RH is relative humidity in percentage.

65 The extremum was  $-9.038/(2 \times (-0.05759)) = 78.46848$  %.

$$\text{New Case Count} = -1.360056 \times \text{SPD}^2 + 5.120123 \times \text{SPD} + 42.1855$$

66 where SPD is wind speed in meter per second (m/s).

67 The extremum was  $-5.120123/(2 \times (-1.360056)) = 1.882321$  m/s.

$$\text{New Case Count} = -7.021 \times \text{VSB} + 89.041$$

68 where VSB is visibility in statute miles.

69 The estimate p-value for VSB was  $< 0.01$ , constant was  $< 0.001$ .

70 Thus, the complex short-term model to be regressed was

New Case Count

$$\begin{aligned} &= (-0.11 \times T^2 + 1.40 \times T - 0.058 \times \text{RH}^2 + 9.04 \times \text{RH} - 1.36 \\ &\times \text{SPD}^2 + 5.12 \times \text{SPD} - 7.02 \times \text{VSB} - 126.66) \times a \\ &\times \text{Existing Confirmed Case Count} \end{aligned}$$

71 where a is a constant to be fitted. All parameters take values 3~7 days before the day

72 new case count is confirmed.

73 Through fitting this full model with the discovery data, a was estimated to be  
74 0.0004786 (standard error 0.0000128,  $p$ -values  $< 2e-16$ ).

75 For long-term model, the fitted model with temperature 14 days ago was as  
76 follows:

$$\text{New Case Count} = -0.10062 \times T^2 + 1.11189 \times T + 46.41792$$

77 The estimate p-value for constant was  $< 0.001$ . The extremum was  $-1.11189/$   
78  $(2 \times (-0.10062)) = 5.525194$ .

79 Thus, the simplified long-term model to be regressed was:

$$\begin{aligned} \text{New Case Count} \\ &= (-0.10 \times T^2 + 1.11 \times T + 46.42) \times b \\ &\times \text{Existing Confirmed Case Count} \end{aligned}$$

80 where b is a constant to be fitted. All parameters take values 14 days before the day  
81 new case count is confirmed.

82 Through fitting this simplified model with the discovery data, b was estimated to  
83 be 0.0061382 (standard error 0.0002666,  $p$ -values  $< 2e-16$ ).



84 Table S1. Model fitness statistics for comparing and selecting proper fitting

85 relationship

|                          | <b>sigma</b> | <b>finTol</b>        | <b>logLik</b> | <b>AIC</b> | <b>BIC</b> | <b>deviance</b> | <b>Corr</b> |
|--------------------------|--------------|----------------------|---------------|------------|------------|-----------------|-------------|
| <b>Temperature</b>       |              |                      |               |            |            |                 |             |
| <b>Linear</b>            | 493          | $4.5 \times 10^{-8}$ | -167          | 339        | 342        | 4860391         | 0.757       |
| <b>Quadric</b>           | 421          | $1.3 \times 10^{-7}$ | -163          | 333        | 337        | 3370230         | 0.812       |
| <b>Relative humidity</b> |              |                      |               |            |            |                 |             |
| <b>Linear</b>            | 627          | $9.8 \times 10^{-8}$ | -172          | 350        | 353        | 7855418         | 0.401       |
| <b>Quadric</b>           | 626          | $8.4 \times 10^{-6}$ | -171          | 351        | 355        | 7442367         | 0.358       |
| <b>Wind speed</b>        |              |                      |               |            |            |                 |             |
| <b>Linear</b>            | 585          | $3.1 \times 10^{-8}$ | -170          | 347        | 350        | 6840545         | 0.380       |
| <b>Quadric</b>           | 546          | $2.4 \times 10^{-7}$ | -168          | 344        | 349        | 5654728         | 0.423       |
| <b>Visibility</b>        |              |                      |               |            |            |                 |             |
| <b>Linear</b>            | 594          | $3.3 \times 10^{-8}$ | -171          | 347        | 351        | 7059799         | 0.354       |
| <b>Quadric</b>           | 598          | $7.9 \times 10^{-7}$ | -170          | 349        | 353        | 6799355         | 0.358       |

86 Note: sigma, estimated standard error of the residuals; finTol, the achieved convergence tolerance; logLik, the

87 log-likelihood of the model; AIC, Akaike's Information Criterion for the model; BIC, Bayesian Information

88 Criterion for the model; deviance, deviance of the model; Corr, Spearman's correlation coefficient between the real

89 values and the predicted values by the predisposed model.

90

91 Table S2. Model fitness statistics for comparing and selecting proper time delay of

92 virus exposure

|                          | <b>sigma</b> | <b>finTol</b>        | <b>logLik</b> | <b>AIC</b> | <b>BIC</b> | <b>deviance</b> | <b>Corr</b> |
|--------------------------|--------------|----------------------|---------------|------------|------------|-----------------|-------------|
| <b>Temperature</b>       |              |                      |               |            |            |                 |             |
| <b>Day 0</b>             | 626          | $2.6 \times 10^{-8}$ | -171          | 351        | 355        | 7441513         | 0.330       |
| <b>Day -3</b>            | 605          | $1.3 \times 10^{-8}$ | -171          | 349        | 353        | 6953553         | 0.479       |
| <b>Day -7</b>            | 664          | $5.4 \times 10^{-8}$ | -173          | 353        | 358        | 8386957         | 0.262       |
| <b>Day -14</b>           | 528          | $1.1 \times 10^{-7}$ | -168          | 343        | 347        | 5297229         | 0.534       |
| <b>Day -3 ~ -7</b>       | 421          | $1.3 \times 10^{-7}$ | -163          | 333        | 337        | 3370230         | 0.812       |
| <b>Relative humidity</b> |              |                      |               |            |            |                 |             |
| <b>Day 0</b>             | 605          | $5.9 \times 10^{-6}$ | -171          | 349        | 353        | 6953396         | 0.389       |
| <b>Day -3</b>            | 679          | $4.3 \times 10^{-6}$ | -173          | 354        | 359        | 8768069         | 0.065       |
| <b>Day -7</b>            | 560          | $5.0 \times 10^{-8}$ | -169          | 346        | 350        | 5962416         | 0.524       |
| <b>Day -14</b>           | 605          | $9.1 \times 10^{-6}$ | -171          | 349        | 353        | 6962609         | 0.326       |
| <b>Day -3 ~ -7</b>       | 626          | $8.4 \times 10^{-6}$ | -171          | 351        | 355        | 7442367         | 0.358       |
| <b>Wind speed</b>        |              |                      |               |            |            |                 |             |
| <b>Day 0</b>             | 526          | $7.4 \times 10^{-8}$ | -167          | 343        | 347        | 5251026         | 0.500       |
| <b>Day -3</b>            | 663          | $1.4 \times 10^{-8}$ | -173          | 353        | 357        | 8343427         | 0.268       |
| <b>Day -7</b>            | 559          | $1.1 \times 10^{-8}$ | -169          | 346        | 350        | 5926891         | 0.516       |
| <b>Day -14</b>           | 674          | $5.2 \times 10^{-8}$ | -173          | 354        | 358.       | 8643076         | 0.014       |
| <b>Day -3 ~ -7</b>       | 546          | $2.4 \times 10^{-7}$ | -168          | 344        | 349        | 5654728         | 0.423       |
| <b>Visibility</b>        |              |                      |               |            |            |                 |             |

|                    |     |                      |      |     |     |         |       |
|--------------------|-----|----------------------|------|-----|-----|---------|-------|
| <b>Day 0</b>       | 646 | $4.2 \times 10^{-9}$ | -173 | 351 | 354 | 8343221 | 0.286 |
| <b>Day -3</b>      | 663 | $5.1 \times 10^{-8}$ | -173 | 352 | 355 | 8804055 | 0.016 |
| <b>Day -7</b>      | 514 | $3.9 \times 10^{-8}$ | -168 | 341 | 344 | 5290247 | 0.502 |
| <b>Day -14</b>     | 635 | $1.1 \times 10^{-8}$ | -172 | 350 | 354 | 8052388 | 0.272 |
| <b>Day -3 ~ -7</b> | 594 | $3.3 \times 10^{-8}$ | -171 | 347 | 351 | 7059799 | 0.354 |

93 Note: sigma, estimated standard error of the residuals; finTol, the achieved convergence tolerance; logLik, the  
 94 log-likelihood of the model; AIC, Akaike's Information Criterion for the model; BIC, Bayesian Information  
 95 Criterion for the model; deviance, deviance of the model; Corr, Spearman's correlation coefficient between the real  
 96 values and the predicted values by the predisposed model.  
 97

98 Table S3. Model fitness statistics for weather-combined model and epidemic only

99 model

| Model                   | sigma | finTol               | logLik | AIC   | BIC   | deviance | Corr  |
|-------------------------|-------|----------------------|--------|-------|-------|----------|-------|
| <b>Weather-combined</b> | 147   | $1.8 \times 10^{-9}$ | -6239  | 12481 | 12491 | 21128810 | 0.171 |
| <b>Epidemic-only</b>    | 149   | $2.1 \times 10^{-8}$ | -6251  | 12507 | 12517 | 21689551 | 0.152 |

100 Note: The weather-combined model is the short-term model with multiplicative constant to be fitted. The  
 101 epidemic-only model is the model only with existing confirmed case count as an independent variable, assuming a  
 102 linear function.



103

104 **Fig. S1.** Scatterplots of new confirmed case count to (A) latitude, (B) elevation, and  
105 (C) the existing confirmed case count, for all the studied sites. Linear regression (C)  
106 interpolation curves are illustrated for each dataset, with 95% confidence intervals  
107 showing in shadow.
