# Supplementary material for: Predicting the local COVID-19 outbreak around the world with meteorological conditions: a model-based qualitative study
Source: PubMed Central journal article supplement — BMJ Open. 2020 Nov 16;10(11):e041397. doi: 10.1136/bmjopen-2020-041397 (PMC7670553; doi:10.1136/bmjopen-2020-041397), 2020-11-16
Supplement: bmjopen-2020-041397supp001.pdf [file bmjopen-2020-041397supp001.pdf]

## 1 **Supplementary Materials and Methods**

### 2 Epidemiological data

3 We scrutinized WHO's situation reports to rule out these countries with only  
4 imported cases, and only collected the confirmed cases with possible or confirmed  
5 local transmission (i.e., without recent travel history to China).

6 For Wuhan city, there was a shortage of test kits at the beginning of the pandemic,  
7 which would make confirmed case counts much lower than the actual data, thus, we  
8 discarded epidemic data before January 28th, the day when domestic test kits have  
9 been approved, produced in large quantities, and were available for Wuhan hospitals.  
10 As there was a cut down problem for the existing confirmed case count on February  
11 20th for Wuhan, when modeling with the existing confirmed case count, only data  
12 before February 20th were used.

### 13 Weather data

14 Temperature and dew point displayed in Fahrenheit were transformed into  
15 Celsius forms, and relative humidity was calculated from temperature and dew point  
16 using the following formula for each time point:

$$\text{RH} = \begin{cases} e^{\frac{7.5D}{237.3+D} - \frac{7.5T}{237.3+T}} \times 100\%, & T < 0 \\ 10^{\frac{7.5D}{237.3+D} - \frac{7.5T}{237.3+T}} \times 100\%, & T \geq 0 \end{cases}$$

17 where RH is the relative humidity, D is the dew point in degrees Celsius, T is the  
18 temperature in degrees Celsius, and  $e$  is the base of the natural log.

19 For each city with epidemiological data, the meteorological station in that city or  
20 that was closest to the latitude and longitude coordinates of the city center was chosen.

21 For a city with more than one meteorological stations, the one nearest to the city  
22 center was chosen. For a province with epidemiological data, the meteorological  
23 station in the capital city of that province was chosen. For a country with only  
24 national wide epidemiological data, weather data were averaged across all the  
25 meteorological observatories in the cities where outbreak was officially reported.  
26 Latitude and elevation for the meteorological observatories were also collected.

### 27 Statistical modeling

28 Only one city Wuhan was chosen for illustrating the time delay effect because it  
29 is the first city to have an outbreak of COVID-19, there was none reported imported  
30 cases for Wuhan, which might obscure the correlation between weather and virus  
31 transmission.

## 32 **Supplementary Results**

### 33 Datasets description

34 Only Chinese cities with monthly confirmed cases over 50 were included in the  
35 discovery dataset, which was 60 cities including Wuhan. The confirmed new cases in  
36 Wuhan on February 13, 2020, reached 13,436, which was oddly high as the daily  
37 confirmed new cases were no larger than 3,000 on all the other dates in Wuhan or in  
38 all the other Chinese cities. We suppose that it might be due to abrupt large  
39 supplement of virus test kits or data correction on that day. In order to reduce the  
40 potential contamination of modeling by this outlier, data on that day were discarded  
41 from the subsequent analysis. There were also two oddly large new confirmed case  
42 counts for Lombardy, which were discarded from the subsequent analysis. Except the

43 outliers, the daily confirmed new cases in the discovery dataset ranged from 1 to  
44 2,997, the average temperature ranged  $-22.54^{\circ}\text{C} \sim 22.16^{\circ}\text{C}$ , the wind speed ranged  
45  $0.56 \sim 9.29$  meter per second, visibility ranged  $1.3 \sim 18.8$  statute miles, and relative  
46 humidity ranged  $30.84\% \sim 98.52\%$ .

#### 47 Model selection

48 With the increase of relative humidity, the amount of droplets in the air increases,  
49 leading to more virus load. However, as the air gets humid, human's respiratory tract  
50 could better defend virus infection. Thus, the relationship of relative humidity could  
51 be complex, not pure linear. Giving comprehensive consideration, we defined the  
52 effect of relative humidity to be quadric. As for visibility, it only affects the amount of  
53 particles in the air, which is positively correlated with virus load. Thus, it is most  
54 probably to exert its effect linearly.

55 Although relative humidity and visibility 7 days ago correlated with the  
56 confirmed new case counts best, there was not great loss of model fitting statistics for  
57 relative humidity and visibility 3~7 days ago, as compared to the loss between 7 days  
58 time delay and 3~7 days time delay for temperature.

#### 59 Fitted models

60 The fitted single-factor models were as follows:

$$\text{New Case Count} = -0.11305 \times T^2 + 1.39819 \times T + 45.11405$$

61 where T is temperature in  $^{\circ}\text{C}$ .

62 The estimate p-value for constant was  $< 0.001$ . The extremum was  $-1.39819/$   
63  $(2 \times (-0.11305)) = 6.183945$   $^{\circ}\text{C}$ .

$$\text{New Case Count} = -0.05759 \times \text{RH}^2 + 9.038 \times \text{RH} - 303.0$$

64 where RH is relative humidity in percentage.

65 The extremum was  $-9.038/(2 \times (-0.05759)) = 78.46848 \%$ .

$$\text{New Case Count} = -1.360056 \times \text{SPD}^2 + 5.120123 \times \text{SPD} + 42.1855$$

66 where SPD is wind speed in meter per second (m/s).

67 The extremum was  $-5.120123/(2 \times (-1.360056)) = 1.882321 \text{ m/s}$ .

$$\text{New Case Count} = -7.021 \times \text{VSB} + 89.041$$

68 where VSB is visibility in statute miles.

69 The estimate p-value for VSB was  $< 0.01$ , constant was  $< 0.001$ .

70 Thus, the complex short-term model to be regressed was

New Case Count

$$\begin{aligned} &= (-0.11 \times T^2 + 1.40 \times T - 0.058 \times \text{RH}^2 + 9.04 \times \text{RH} - 1.36 \\ &\times \text{SPD}^2 + 5.12 \times \text{SPD} - 7.02 \times \text{VSB} - 126.66) \times a \\ &\times \text{Existing Confirmed Case Count} \end{aligned}$$

71 where a is a constant to be fitted. All parameters take values 3~7 days before the day  
72 new case count is confirmed.

73 Through fitting this full model with the discovery data, a was estimated to be  
74 0.0004786 (standard error 0.0000128,  $p$ -values  $< 2e-16$ ).

75 For long-term model, the fitted model with temperature 14 days ago was as  
76 follows:

$$\text{New Case Count} = -0.10062 \times T^2 + 1.11189 \times T + 46.41792$$

77 The estimate p-value for constant was  $< 0.001$ . The extremum was  $-1.11189/$   
78  $(2 \times (-0.10062)) = 5.525194$ .

79 Thus, the simplified long-term model to be regressed was:

New Case Count

$$= (-0.10 \times T^2 + 1.11 \times T + 46.42) \times b$$

$\times$  Existing Confirmed Case Count

80 where  $b$  is a constant to be fitted. All parameters take values 14 days before the day  
81 new case count is confirmed.

82 Through fitting this simplified model with the discovery data,  $b$  was estimated to  
83 be 0.0061382 (standard error 0.0002666,  $p$ -values  $< 2e-16$ ).

84 Table S1. Model fitness statistics for comparing and selecting proper fitting

85 relationship

|                          | <b>sigma</b> | <b>finTol</b>        | <b>logLik</b> | <b>AIC</b> | <b>BIC</b> | <b>deviance</b> | <b>Corr</b> |
|--------------------------|--------------|----------------------|---------------|------------|------------|-----------------|-------------|
| <b>Temperature</b>       |              |                      |               |            |            |                 |             |
| <b>Linear</b>            | 493          | $4.5 \times 10^{-8}$ | -167          | 339        | 342        | 4860391         | 0.757       |
| <b>Quadric</b>           | 421          | $1.3 \times 10^{-7}$ | -163          | 333        | 337        | 3370230         | 0.812       |
| <b>Relative humidity</b> |              |                      |               |            |            |                 |             |
| <b>Linear</b>            | 627          | $9.8 \times 10^{-8}$ | -172          | 350        | 353        | 7855418         | 0.401       |
| <b>Quadric</b>           | 626          | $8.4 \times 10^{-6}$ | -171          | 351        | 355        | 7442367         | 0.358       |
| <b>Wind speed</b>        |              |                      |               |            |            |                 |             |
| <b>Linear</b>            | 585          | $3.1 \times 10^{-8}$ | -170          | 347        | 350        | 6840545         | 0.380       |
| <b>Quadric</b>           | 546          | $2.4 \times 10^{-7}$ | -168          | 344        | 349        | 5654728         | 0.423       |
| <b>Visibility</b>        |              |                      |               |            |            |                 |             |
| <b>Linear</b>            | 594          | $3.3 \times 10^{-8}$ | -171          | 347        | 351        | 7059799         | 0.354       |
| <b>Quadric</b>           | 598          | $7.9 \times 10^{-7}$ | -170          | 349        | 353        | 6799355         | 0.358       |

86 Note: sigma, estimated standard error of the residuals; finTol, the achieved convergence tolerance; logLik, the

87 log-likelihood of the model; AIC, Akaike's Information Criterion for the model; BIC, Bayesian Information

88 Criterion for the model; deviance, deviance of the model; Corr, Spearman's correlation coefficient between the real

89 values and the predicted values by the predisposed model.

90

91 Table S2. Model fitness statistics for comparing and selecting proper time delay of

92 virus exposure

|                          | <b>sigma</b> | <b>finTol</b>        | <b>logLik</b> | <b>AIC</b> | <b>BIC</b> | <b>deviance</b> | <b>Corr</b> |
|--------------------------|--------------|----------------------|---------------|------------|------------|-----------------|-------------|
| <b>Temperature</b>       |              |                      |               |            |            |                 |             |
| <b>Day 0</b>             | 626          | $2.6 \times 10^{-8}$ | -171          | 351        | 355        | 7441513         | 0.330       |
| <b>Day -3</b>            | 605          | $1.3 \times 10^{-8}$ | -171          | 349        | 353        | 6953553         | 0.479       |
| <b>Day -7</b>            | 664          | $5.4 \times 10^{-8}$ | -173          | 353        | 358        | 8386957         | 0.262       |
| <b>Day -14</b>           | 528          | $1.1 \times 10^{-7}$ | -168          | 343        | 347        | 5297229         | 0.534       |
| <b>Day -3 ~ -7</b>       | 421          | $1.3 \times 10^{-7}$ | -163          | 333        | 337        | 3370230         | 0.812       |
| <b>Relative humidity</b> |              |                      |               |            |            |                 |             |
| <b>Day 0</b>             | 605          | $5.9 \times 10^{-6}$ | -171          | 349        | 353        | 6953396         | 0.389       |
| <b>Day -3</b>            | 679          | $4.3 \times 10^{-6}$ | -173          | 354        | 359        | 8768069         | 0.065       |
| <b>Day -7</b>            | 560          | $5.0 \times 10^{-8}$ | -169          | 346        | 350        | 5962416         | 0.524       |
| <b>Day -14</b>           | 605          | $9.1 \times 10^{-6}$ | -171          | 349        | 353        | 6962609         | 0.326       |
| <b>Day -3 ~ -7</b>       | 626          | $8.4 \times 10^{-6}$ | -171          | 351        | 355        | 7442367         | 0.358       |
| <b>Wind speed</b>        |              |                      |               |            |            |                 |             |
| <b>Day 0</b>             | 526          | $7.4 \times 10^{-8}$ | -167          | 343        | 347        | 5251026         | 0.500       |
| <b>Day -3</b>            | 663          | $1.4 \times 10^{-8}$ | -173          | 353        | 357        | 8343427         | 0.268       |
| <b>Day -7</b>            | 559          | $1.1 \times 10^{-8}$ | -169          | 346        | 350        | 5926891         | 0.516       |
| <b>Day -14</b>           | 674          | $5.2 \times 10^{-8}$ | -173          | 354        | 358        | 8643076         | 0.014       |
| <b>Day -3 ~ -7</b>       | 546          | $2.4 \times 10^{-7}$ | -168          | 344        | 349        | 5654728         | 0.423       |
| <b>Visibility</b>        |              |                      |               |            |            |                 |             |

---

|                    |     |                      |      |     |     |         |       |
|--------------------|-----|----------------------|------|-----|-----|---------|-------|
| <b>Day 0</b>       | 646 | $4.2 \times 10^{-9}$ | -173 | 351 | 354 | 8343221 | 0.286 |
| <b>Day -3</b>      | 663 | $5.1 \times 10^{-8}$ | -173 | 352 | 355 | 8804055 | 0.016 |
| <b>Day -7</b>      | 514 | $3.9 \times 10^{-8}$ | -168 | 341 | 344 | 5290247 | 0.502 |
| <b>Day -14</b>     | 635 | $1.1 \times 10^{-8}$ | -172 | 350 | 354 | 8052388 | 0.272 |
| <b>Day -3 ~ -7</b> | 594 | $3.3 \times 10^{-8}$ | -171 | 347 | 351 | 7059799 | 0.354 |

---

93 Note: sigma, estimated standard error of the residuals; finTol, the achieved convergence tolerance; logLik, the  
94 log-likelihood of the model; AIC, Akaike's Information Criterion for the model; BIC, Bayesian Information  
95 Criterion for the model; deviance, deviance of the model; Corr, Spearman's correlation coefficient between the real  
96 values and the predicted values by the predisposed model.

97



98 Table S3. Model fitness statistics for weather-combined model and epidemic only

99 model

| <b>Model</b>            | <b>sigma</b> | <b>finTol</b>        | <b>logLik</b> | <b>AIC</b> | <b>BIC</b> | <b>deviance</b> | <b>Corr</b> |
|-------------------------|--------------|----------------------|---------------|------------|------------|-----------------|-------------|
| <b>Weather-combined</b> | 147          | $1.8 \times 10^{-9}$ | -6239         | 12481      | 12491      | 21128810        | 0.171       |
| <b>Epidemic-only</b>    | 149          | $2.1 \times 10^{-8}$ | -6251         | 12507      | 12517      | 21689551        | 0.152       |

100 Note: The weather-combined model is the short-term model with multiplicative constant to be fitted. The

101 epidemic-only model is the model only with existing confirmed case count as an independent variable, assuming a

102 linear function.

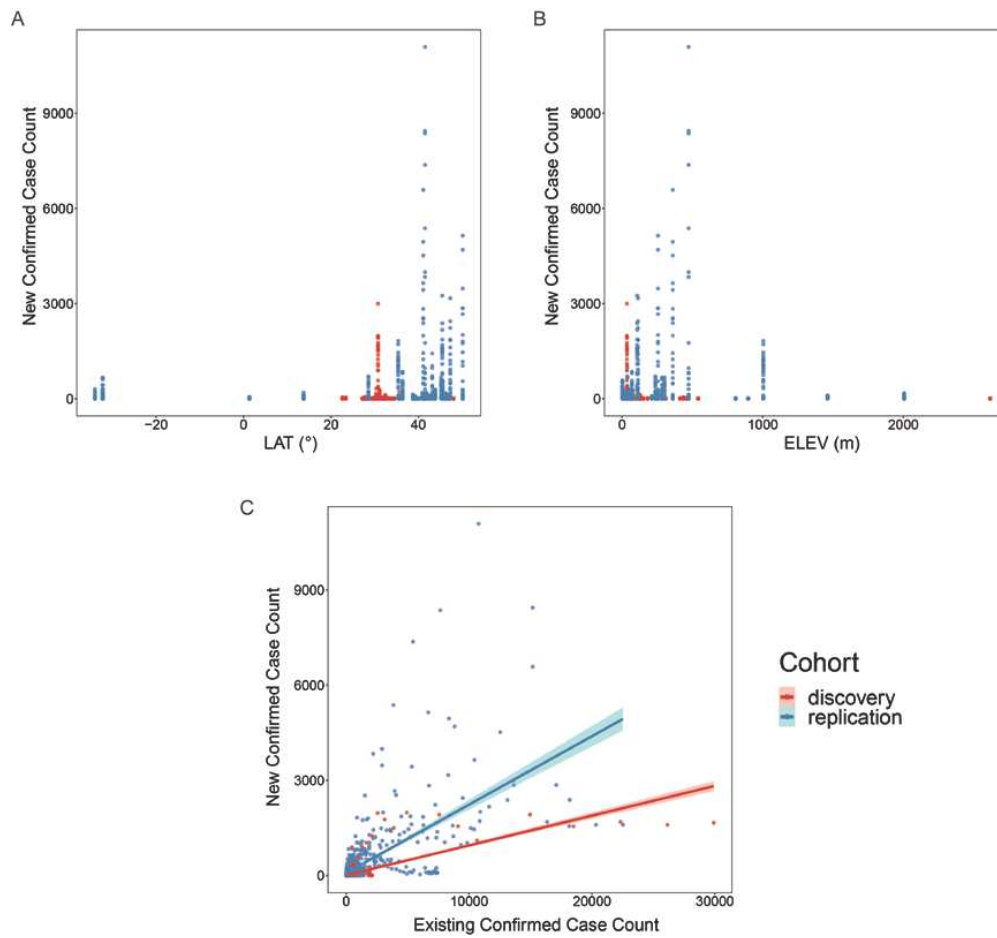

103

104 **Fig. S1.** Scatterplots of new confirmed case count to (A) latitude, (B) elevation, and  
105 (C) the existing confirmed case count, for all the studied sites. Linear regression (C)  
106 interpolation curves are illustrated for each dataset, with 95% confidence intervals  
107 showing in shadow.
